# Supplementary material for: Pseudoautosomal Region 1 Overdosage Affects the Global Transcriptome in iPSCs From Patients With Klinefelter Syndrome and High-Grade X Chromosome Aneuploidies
Source: Front Cell Dev Biol. 2022 Feb 3;9:801597. doi: 10.3389/fcell.2021.801597 (PMC8850648; doi:10.3389/fcell.2021.801597)
Supplement: Supplementary file 11 [file Table12.xlsx]

## Sheet: Bulk RNA-Seq
Table S12: Bulk and scRNA-Sequencing technical Information. Counts of sequenced reads in the bulk RNA-Seq uniquely mapped to a single location and number of detected mono- and bi-allelically expressed escape genes. In the second sheet (scRNA-Seq) are reported: the name of the samples, and the number of cells , detected UMIs per cell and number of genes per cell for each iPSC line used for the scR…
RNA-seq Sample name	Sample nomenclature	Stage	Karyotype	Input-reads	Unique	Multi	Unmapped	Mismatch-ratio	Mapped reads	Mapped reads (%)	N. X-Linked Biallelic genes	N. X-Linked Monollelic genes
M_18_3210_1302_AD016_L006_R1_001	HM #A	iPSC	XX,46	32821142	30244818 (92.1504%)	2184080 (6.65449%)	392244 (1.1951%)	0.001	26676967	81.2798	18	135
M_19_1100_1306_AD027_L002_R1_001	HM #B	iPSC	XX,46	33747322	30864658 (91.4581%)	1993170 (5.90616%)	889494 (2.63575%)	0.0008	27120843	80.3644	15	139
M_19_1146_1305_AD025_L007_R1_001	HM #B	iPSC	XX,46	56249382	51730979 (91.9672%)	3199227 (5.68758%)	1319176 (2.34523%)	0.0008	45180727	80.3222	19	153
M_18_3209_1301_AD014_L006_R1_001	HM #A	iPSC	XX,46	54806862	50584816 (92.2965%)	3451308 (6.29722%)	770738 (1.40628%)	0.001	44816689	81.772	N/A	N/A
M_18_3198_1285_AD005_L005_R1_001	HB #A	iPSC	XY,46	28292744	26205106 (92.6213%)	1646275 (5.81872%)	441363 (1.55999%)	0.0009	23204047	82.0141	7	95
M_18_3197_1284_AD004_L005_R1_001	HB #A	iPSC	XY,46	33582386	31402155 (93.5078%)	1861636 (5.54349%)	318595 (0.948697%)	0.001	27558262	82.0617	7	101
M_18_3199_1286_AD007_L005_R1_001	HB #B	iPSC	XY,46	18138464	16951620 (93.4568%)	995493 (5.4883%)	191351 (1.05495%)	0.001	14996797	82.6795	5	93
M_18_3200_1287_AD012_L005_R1_001	HB #B	iPSC	XY,46	37165364	34520685 (92.884%)	2247961 (6.04854%)	396718 (1.06744%)	0.001	30209429	81.2838	8	111
M_18_3201_1288_AD014_L005_R1_001	HB #C	iPSC	XY,46	50918686	47216285 (92.7288%)	2876522 (5.64925%)	825879 (1.62196%)	0.001	41017492	80.5549	9	114
M_18_3202_1289_AD016_L005_R1_001	HB #C	iPSC	XY,46	56884484	52514250 (92.3174%)	3426651 (6.02388%)	943583 (1.65877%)	0.001	45764870	80.4523	9	118
M-19-3759_1785_AD008_L008_R1_001	KS4 #A	iPSC	XY,46	33513011	30885949 (92.1611%)	2001372 (5.97193%)	625690 (1.86701%)	0.0009	27547189	82.1985	N/A	N/A
M-19-3757_1783_AD001_L008_R1_001	KS4 #A	iPSC	XY,46	40815216	37736041 (92.4558%)	2439733 (5.97751%)	639442 (1.56668%)	0.0009	33588426	82.2939	N/A	N/A
M-19-3758_1784_AD003_L008_R1_001	KS4 #A	iPSC	XY,46	52285133	48048664 (91.8974%)	3255034 (6.22554%)	981435 (1.87708%)	0.0009	42629423	81.5326	N/A	N/A
M_18_3331_1382_AD016_L002_R1_001	KS6 #A	iPSC	XY,46	26606640	24087269 (90.531%)	1600160 (6.01414%)	919211 (3.45482%)	0.0008	21798320	81.9281	8	100
M_18_3330_1381_AD015_L002_R1_001	KS6 #A	iPSC	XY,46	36956997	33797288 (91.4503%)	2168491 (5.86761%)	991218 (2.68208%)	0.0008	30563167	82.6993	9	108
M-19-3760_1845_AD020_L008_R1_001	KS4 #B	iPSC	XY,46	36367573	33445101 (91.9641 )	2400589 (6.60091 )	521883 (1.43502 )	0.09	29567127	81.3008	N/A	N/A
M-19-3761_1846_AD021_L008_R1_001	KS4 #B	iPSC	XY,46	53909147	48983955 (90.8639 )	3670697 (6.80904 )	1254495 (2.32705 )	0.1	43389633	80.4866	N/A	N/A
M_18_3319_1370_AD004_L001_R1_001	KS2 #A	iPSC	XXY,47	29784860	26884988 (90.2639%)	1814786 (6.09298%)	1085086 (3.64308%)	0.0009	23731347	79.6759	11	105
M_18_3320_1371_AD005_L001_R1_001	KS2 #B	iPSC	XXY,47	38439511	34513855 (89.7874%)	2425109 (6.3089%)	1500547 (3.90366%)	0.0009	30683867	79.8238	15	111
M_18_3321_1372_AD006_L001_R1_001	KS2 #B	iPSC	XXY,47	42979356	38504244 (89.5878%)	2596075 (6.04028%)	1879037 (4.37195%)	0.0009	34291478	79.7859	15	111
M_18_3336_1387_AD005_L003_R1_001	KS3 #A	iPSC	XXY,47	27558024	24872199 (90.2539%)	1820896 (6.6075%)	864929 (3.13857%)	0.0009	22135610	80.3236	60	60
M_18_3337_1388_AD014_L003_R1_001	KS3 #A	iPSC	XXY,47	28757499	26193560 (91.0843%)	1822482 (6.33741%)	741457 (2.57831%)	0.0009	23354998	81.2136	58	62
M_18_3339_1390_AD016_L003_R1_001	KS3 #B	iPSC	XXY,47	32379519	28996686 (89.5526%)	2218932 (6.85289%)	1163901 (3.59456%)	0.0009	25808637	79.7067	32	82
M_18_3338_1389_AD015_L003_R1_001	KS3 #B	iPSC	XXY,47	43978927	39621085 (90.0911%)	2909623 (6.61595%)	1448219 (3.29298%)	0.0009	35338674	80.3537	57	91
M_18_3323_1374_AD013_L001_R1_001	KS4 #C	iPSC	XXY,47	42165852	38183727 (90.556%)	2555152 (6.05977%)	1426973 (3.38419%)	0.001	33757121	80.058	23	139
M_18_3325_1376_AD019_L001_R1_001	KS4 #D	iPSC	XXY,47	39576049	35830082 (90.5348%)	2434367 (6.15111%)	1311600 (3.31413%)	0.0009	31962427	80.762	21	138
M_18_3324_1375_AD018_L001_R1_001	KS4 #D	iPSC	XXY,47	43299819	39072351 (90.2368%)	2837573 (6.55331%)	1389895 (3.20993%)	0.0009	34740133	80.2316	20	144
M_18_3208_1295_AD013_L006_R1_001	KS4 #E	iPSC	XXY,47	37459397	34767375 (92.8135%)	2346629 (6.26446%)	345393 (0.922046%)	0.001	30870694	82.4111	20	139
M_18_3205_1292_AD002_L006_R1_001	KS4 #F	iPSC	XXY,47	27894599	25871382 (92.7469%)	1789319 (6.41457%)	233898 (0.838506%)	0.0011	22896472	82.0821	24	121
M_19_1117_1397_AD003_L004_R1_001	KS5 #A	iPSC	XXY,47	28206399	25958588 (92.0308%)	1615379 (5.72699%)	632432 (2.24216%)	0.0009	22671367	80.3767	16	123
M_18_3326_1377_AD007_L002_R1_001	KS6 #B	iPSC	XXY,47	38083294	34423983 (90.3913%)	2197794 (5.77102%)	1461517 (3.83769%)	0.0008	30298707	79.5591	10	107
M_18_3327_1378_AD012_L002_R1_001	KS6 #B	iPSC	XXY,47	21592239	19503477 (90.3263%)	1243500 (5.75901%)	845262 (3.91466%)	0.0008	17292927	80.0886	11	97
M_18_3203_1290_AD018_L005_R1_001	KS4 #G	iPSC	XXY,47	50672548	47153017 (93.0544 )	2903483 (5.72989 )	616048 (1.21574 )	0.11	41166009	81.2393	N/A	N/A
M_18_3204_1291_AD019_L005_R1_001	KS4 #G	iPSC	XXY,47	63481300	58601568 (92.3131 )	3854682 (6.07215 )	1025050 (1.61473 )	0.11	51200906	80.6551	N/A	N/A
M_18_3206_1293_AD007_L006_R1_001	KS4 #F	iPSC	XXY,47	44891800	41560305 (92.5788 )	2930126 (6.52709 )	401369 (0.894081 )	0.1	36840883	82.066	N/A	N/A
M_18_3207_1294_AD012_L006_R1_001	KS4 #E	iPSC	XXY,47	47792423	44254813 (92.598 )	3146656 (6.58401 )	390954 (0.818025 )	0.1	39407992	82.4566	N/A	N/A
M_18_3322_1373_AD007_L001_R1_001	KS4 #C	iPSC	XXY,47	33943335	30744277 (90.5753 )	2053200 (6.0489 )	1145858 (3.3758 )	0.1	27202233	80.1401	N/A	N/A
M_18_3318_1369_AD002_L001_R1_001	KS2 #A	iPSC	XXY,47	44099741	40197917 (91.1523 )	2468556 (5.59767 )	1433268 (3.25006 )	0.09	35332334	80.1191	N/A	N/A
M_19_1118_1398_AD008_L004_R1_001	KS5 #A	iPSC	XXY,47	27465809	25335919 (92.2453 )	1538058 (5.5999 )	591832 (2.1548 )	0.09	22319840	81.2641	N/A	N/A
M_19_1107_1395_AD022_L002_R1_001	KS5 #B	iPSC	XXY,47	39475506	36008649 (91.2177 )	2528545 (6.40535 )	938312 (2.37695 )	0.09	31337871	79.3856	N/A	N/A
M_19_1116_1396_AD001_L004_R1_001	KS5 #A	iPSC	XXY,47	31274327	28491973 (91.1034 )	1937975 (6.1967 )	844379 (2.69991 )	0.09	24843948	79.4388	N/A	N/A
M_18_3334_1385_AD002_L003_R1_001	KS7 #A	iPSC	XXXY,48	35820000	32497080 (90.7233%)	2141586 (5.97874%)	1181334 (3.29797%)	0.0009	29190894	0.814933	17	134
M_18_3335_1386_AD004_L003_R1_001	KS7 #A	iPSC	XXXY,48	31545000	28552185 (90.5126%)	2014565 (6.38632%)	978250 (3.10113%)	0.0009	25661755	0.813497	17	134
M_18_3332_1383_AD018_L002_R1_001	KS7 #B	iPSC	XXXXY,49	30745147	28256581 (91.9058%)	1894026 (6.16041%)	594540 (1.93377%)	0.0008	25069936	0.815411	20	120
M_18_3333_1384_AD019_L002_R1_001	KS7 #B	iPSC	XXXXY,49	50067345	45318087 (90.5143%)	3140560 (6.27267%)	1608698 (3.21307%)	0.0008	40210921	0.803137	23	136
M_19_1094_1580_AD008_L001_R1_001	KS1 #D	iPSC	XXXXY,49	49927767	45765877 (91.6642%)	3159592 (6.32833%)	1002298 (2.0075%)	0.0011	40835621	0.817894	N/A	N/A
M_19_1095_1581_AD009_L001_R1_001	KS1 #D	iPSC	XXXXY,49	43563992	40236863 (92.3627%)	2636432 (6.05186%)	690697 (1.58548%)	0.0012	35913688	0.824389	N/A	N/A
M_19_1444_1321_AD015_L006_R1_001	HM #B	DE	46,XX	46807938	42854916 (91.5548%)	2732118 (5.83687%)	1220904 (2.60833%)	0.001	38376643	0.819875	18	142
M_19_1445_1322_AD016_L006_R1_001	HM #B	DE	46,XX	24868200	22557217 (90.7071%)	1396212 (5.61445%)	914771 (3.67848%)	0.001	20156357	0.810527	18	112
M_19_1446_1323_AD018_L006_R1_001	HM #A	DE	46,XX	39404630	36095226 (91.6015%)	2274046 (5.77101%)	1035358 (2.6275%)	0.001	31977968	0.811528	20	132
M_19_1447_1324_AD019_L006_R1_001	HM #A	DE	46,XX	44970060	41188885 (91.5918%)	2679905 (5.95931%)	1101270 (2.4489%)	0.001	36498145	0.81161	17	131
M_19_1432_1307_AD002_L005_R1_001	HB #A	DE	46,XY	26351394	24480558 (92.9004%)	1587675 (6.02501%)	283161 (1.07456%)	0.0011	21220942	0.805306	9	92
M_19_1433_1308_AD004_L005_R1_001	HB #A	DE	46,XY	103810155	95281957 (91.7848%)	5774108 (5.56218%)	2754090 (2.65301%)	0.0011	82853237	0.798123	11	133
M_19_1434_1309_AD005_L005_R1_001	HB #B	DE	46,XY	34426803	31585946 (91.7481%)	1959938 (5.69306%)	880919 (2.55882%)	0.0011	27789581	0.807208	8	105
M_19_1435_1310_AD014_L005_R1_001	HB #B	DE	46,XY	28677471	26247842 (91.5277%)	1649751 (5.75278%)	779878 (2.71948%)	0.0011	23237812	0.810316	8	90
M_19_1437_1312_AD016_L005_R1_001	HB #C	DE	46,XY	16779751	15227119 (90.747%)	1025729 (6.1129%)	526903 (3.14011%)	0.0011	13331606	0.794506	N/A	N/A
M_19_1436_1311_AD015_L005_R1_001	HB #C	DE	46,XY	34342007	31389406 (91.4024%)	2107170 (6.13584%)	845431 (2.4618%)	0.0011	27568167	0.802754	N/A	N/A
M_19_1439_1314_AD019_L005_R1_001	not used in iPSC	DE	47,XXY KS	43046352	39325245 (91.3556%)	2766174 (6.42604%)	954933 (2.21838%)	0.0012	34736472	0.806955	N/A	N/A
M_19_1438_1313_AD018_L005_R1_001	not used in iPSC	DE	47,XXY KS	27261345	25000839 (91.708%)	1622701 (5.95239%)	637805 (2.33959%)	0.0012	22299344	0.817984	N/A	N/A
M_19_1441_1316_AD004_L006_R1_001	KS4 #F	DE	47,XXY KS	34792054	31621862 (90.8882%)	2078800 (5.97493%)	1091392 (3.1369%)	0.0011	27843397	0.80028	N/A	N/A
M_19_1440_1315_AD002_L006_R1_001	KS4 #F	DE	47,XXY KS	37161358	33512401 (90.1808%)	2058460 (5.53925%)	1590497 (4.27998%)	0.001	29825273	0.802588	24	126
M_19_1442_1317_AD005_L006_R1_001	KS4 #E	DE	47,XXY KS	66416497	60910697 (91.7102%)	4187366 (6.30471%)	1318434 (1.9851%)	0.0011	53131618	0.799976	21	152
M_19_1443_1318_AD014_L006_R1_001	KS4 #E	DE	47,XXY KS	37482255	34303712 (91.5199%)	2216703 (5.91401%)	961840 (2.56612%)	0.001	30074176	0.802358	18	134
M_19_1105_1639_AD011_L002_R1_001	KS4 #D	DE	47,XXY KS	25729793	23784341 (92.4389%)	1423395 (5.53209%)	522057 (2.029%)	0.0009	20774850	0.807424	21	112
M_19_1104_1638_AD010_L002_R1_001	KS4 #D	DE	47,XXY KS	32632034	29718027 (91.0701%)	1835368 (5.62444%)	1078639 (3.30546%)	0.0009	26115307	0.800297	20	124
M_19_1098_1618_AD021_L001_R1_001	KS5 #A	DE	47,XXY KS	59333832	54612283 (92.0424%)	3541106 (5.96811%)	1180443 (1.98949%)	0.0012	47989099	0.808798	20	155
M_19_1099_1619_AD022_L001_R1_001	KS5 #A	DE	47,XXY KS	30567210	28094827 (91.9116%)	1826741 (5.97615%)	645642 (2.1122%)	0.0012	25102236	0.821214	16	128
M_19_1103_1615_AD009_L002_R1_001	KS3 #A	DE	47,XXY KS	24805145	22680554 (91.4349%)	1431580 (5.7713%)	693011 (2.79382%)	0.0008	20032680	0.807602	54	59
M_19_1102_1614_AD008_L002_R1_001	KS3 #A	DE	47,XXY KS	29941300	27447290 (91.6703%)	1747397 (5.83608%)	746613 (2.49359%)	0.0008	24235201	0.809424	55	60
M_19_1092_1606_AD001_L001_R1_001	KS7 #A	DE	48,XXXY KS	33149137	30496242 (91.9971%)	1951166 (5.88602%)	701729 (2.11688%)	0.0011	27133025	0.818514	22	122
M_19_1093_1607_AD003_L001_R1_001	KS7 #A	DE	48,XXXY KS	24451751	22402012 (91.6172%)	1438695 (5.88381%)	611044 (2.49898%)	0.0011	20102314	0.822122	20	111
M_19_1097_1583_AD011_L001_R1_001	KS1 #D	DE	49,XXXXY	25620480	23591297 (92.0798%)	1429991 (5.58144%)	599192 (2.33872%)	0.0012	20831055	0.813063	24	133
M_19_1096_1582_AD010_L001_R1_001	KS1 #D	DE	49,XXXXY	36561815	33590300 (91.8726%)	2210704 (6.04648%)	760811 (2.08089%)	0.0012	29502648	0.806925	27	146
M_19_1127_1603_AD022_L005_R1_001	KS7 #B	DE	49,XXXXY	83013421	76540178 (92.2022%)	4887251 (5.8873%)	1585992 (1.91052%)	0.0011	67212821	0.809662	31	153
M_19_1453_1602_AD021_L007_R1_001	KS7 #B	DE	49,XXXXY	62311014	57274063 (91.9164%)	3630324 (5.82614%)	1406627 (2.25743%)	0.0009	50670148	0.813181	28	148
M_19_1451_1598_AD010_L007_R1_001	not used in iPSC	DE	49,XXXXY	43266457	39512721 (91.3241%)	2200312 (5.08549%)	1553424 (3.59037%)	0.0009	34815881	0.804685	N/A	N/A
M_19_1452_1599_AD011_L007_R1_001	not used in iPSC	DE	49,XXXXY	39347642	35991505 (91.4706%)	2301779 (5.84985%)	1054358 (2.6796%)	0.0009	31517636	0.801004	N/A	N/A
M_19_3739_1672_AD010_L005_R1_001	KS4	Fibroblasts	47,XXY	27522191	25936495 (94.2385%)	1231514 (4.47462%)	354182 (1.2869%)	0.001	24366878	0.885354	32	194
M_19_3740_1673_AD022_L005_R1_001	KS4	Fibroblasts	47,XXY	24727206	23196655 (93.8103%)	1129148 (4.56642%)	401403 (1.62333%)	0.001	21792040	0.881298	35	197
M_19_1408_1680_AD001_L002_R1_001	HM	Fibroblasts	46,XX	43281338	40482996 (93.5345%)	1917702 (4.43078%)	880640 (2.03469%)	0.0009	37763878	0.872521	85	60
M_19_1409_1681_AD003_L002_R1_001	HM	Fibroblasts	46,XX	35710766	33655083 (94.2435%)	1525713 (4.27242%)	529970 (1.48406%)	0.0009	31390003	0.879007	82	57
M_19_1410_1682_AD008_L002_R1_001	HB	Fibroblasts	46,XY	37822399	35815668 (94.6943%)	1571470 (4.15487%)	435261 (1.1508%)	0.0009	33578827	0.887803	9	97
M_19_1411_1683_AD009_L002_R1_001	HB	Fibroblasts	46,XY	41780142	39498086 (94.5379%)	1792722 (4.29085%)	489334 (1.17121%)	0.0009	37019667	0.886059	9	96
M_19_1412_1684_AD010_L002_R1_001	KS2	Fibroblasts	47,XXY	26309598	24850903 (94.4557%)	1003730 (3.81507%)	454965 (1.72927%)	0.0009	23371833	0.888339	32	185
M_19_1413_1685_AD011_L002_R1_001	KS2	Fibroblasts	47,XXY	41918874	39689769 (94.6823%)	1599526 (3.81577%)	629579 (1.5019%)	0.0009	37428800	0.892887	35	199
M_19_1414_1686_AD021_L002_R1_001	KS7	Fibroblasts	49,XXXXY	51766229	48720023 (94.1155%)	2038263 (3.93744%)	1007943 (1.94711%)	0.0008	46177532	0.89204	69	168
M_19_1415_1687_AD022_L002_R1_001	KS7	Fibroblasts	49,XXXXY	43619730	40990141 (93.9716%)	1732419 (3.97164%)	897170 (2.0568%)	0.0009	38404540	0.88044	72	174
M_19_1454_1670_AD020_L007_R1_001	KS1	Fibroblasts	49,XXXXY	18584699	17553738 (94.4526%)	707747 (3.80822%)	323214 (1.73914%)	0.0007	16552543	0.890654	23	173
M_19_1455_1671_AD023_L007_R1_001	KS1	Fibroblasts	49,XXXXY	14713005	13959756 (94.8804%)	589045 (4.00357%)	164204 (1.11605%)	0.0008	13186363	0.896239	24	152

## Sheet: scRNA-Seq
Table S12: : Bulk and scRNA-Sequencing technical Information. Counts of sequenced reads in the bulk RNA-Seq uniquely mapped to a single location. Summary of samples, number of cells, number of genes per cell and detected UMIs per cell in the scRNA-Seq. Mean reads per cell and percentage of reads confidently mapped to genome are shown.
			UMIs per cell				Genes per cell
Sample Name	Karyotype	Number of cells	min	median	mean	max	min	median	mean	max	Reads Mapped Confidently to genome(%)
KS1-iPSC#D	49, XXXXY	1747	10487	20227	22757.5	22757.5	3622	4864	5044.89	8646	8646
HB-iPSC#A	46, XY	1152	13282	45973.5	49830.8	49830.8	3738	7137.5	7232.28	11715	11715
HM-iPSC#B	46, XX	1153	14471	59568	61406.9	61406.9	3627	8082	8034.66	11912	11912
KS6-iPSC#B	47, XXY	1158	11497	39608.5	44849.3	44849.3	3671	6968	7120.87	12265	12265
KS6-iPSC#A	46, XY	775	11238	51643	56143.3	56143.3	3930	7775	7848.27	11954	11954
KS7-iPSC#B	49, XXXXY	1141	14500	42779	45525.5	45525.5	3737	6799	6870.23	10886	10886
KS7-iPSC#A	48, XXXY	825	12284	48353	50261.1	50261.1	3827	7423	7436.45	10861	10861
KS3-iPSC#A	47, XXY	984	11387	59196.5	65280.9	65280.9	3657	7671.5	7790.57	11633	11633
