# Supplementary material for: Pseudoautosomal Region 1 Overdosage Affects the Global Transcriptome in iPSCs From Patients With Klinefelter Syndrome and High-Grade X Chromosome Aneuploidies
Source: Front Cell Dev Biol. 2022 Feb 3;9:801597. doi: 10.3389/fcell.2021.801597 (PMC8850648; doi:10.3389/fcell.2021.801597)
Supplement: Supplementary file 12 [file Table5.xlsx]

## Sheet: TABLE S5
Table S5: Survey of previously published transcriptomic analysis. The table compares X-linked gene Xa/Xi status in different cell types, mono- or biallelic gene expression status, identified X-linked DEGs in healthy males Vs 47, XXY Klinefelter patients or sex-biased X-linked genes.
Present study (47,XXY vs 46,XY) AND (48,XXXY/49,XXXXY vs 46,XY) (hiPSC)									Present study (47,XXY vs 46,XY) AND (48,XXXY/49,XXXXY vs 46,XY) (Definitive Endoderm)					Tukiainen et al., 2017 (Table 13)		Panula et al., 2019 (47,XXY vs 46,XY) (hiPSCs) Table S6					Skakkebæk et al., 2018 (47,XXY vs 46,XY) (Peripheral blood)		Zhang et al., 2020 (47,XXY vs 46,XY) (PBMCs) Dataset S2		Raznahan et al., 2018 (47,XXY vs 46,XY) (LCLs)		Balaton et al., 2015 (47,XXY vs 46,XY) (Table S1) E= escaping XCI, VE=Variable Escape, S= Subject to XCI		Oliva et al., 2020 (XX Vs XY) (Table S3) Gene reported as X-inactivation escapee, 1 if reported, otherwise 0
48-49,KS Vs 46,XY							Gene status		48-49,KS Vs 46,XY			Gene status		Sex-biased X-linked genes		47,XXY Vs 46,XY			Gene status		47,XXY Vs 46,XY		47,XXY Vs 46,XY		47,XXY Vs 46,XY		Consensus of X-linked genes inactivation status		Sex-biased X-linked genes
Gene stable ID	Gene name	Chromosome	Gene start (bp)	Gene end (bp)	Categories	DEGs	Biallelic	Monoallelic	Gene name	Categories	DEGs	Biallelic	Monoallelic	Gene name	Categories	Gene name	Categories	DEGs	KS#1	KS#2	Gene name	DEGs	Gene name	DEGs	Gene name	DEGs	Gene name	XCI status	Gene name	XCI status
ENSG00000197976	AKAP17A	X	1591604	1602520	PAR1	Upregulated	Biallelic	#N/A	AKAP17A		Upregulated	Biallelic	#N/A	AKAP17A	Escape	AKAP17A	AKAP17A	PAR	bi-allelic	bi-allelic	AKAP17A	Upregulated	AKAP17A	0.519347			AKAP17A	PAR	AKAP17A	1
ENSG00000182287	AP1S2	X	15825806	15854931	#N/A	Upregulated	#N/A	Monoallelic	AP1S2		Upregulated	#N/A	Monoallelic	AP1S2	Escape	AP1S2	AP1S2	escape	bi-allelic	0					AP1S2	Upregulated	AP1S2	Mostly E	AP1S2	1
ENSG00000171388	APLN	X	129645259	129654956	#N/A	Downregulated	#N/A	Monoallelic						APLN	Inactive												APLN	Mostly S	APLN	0
ENSG00000169093	ASMTL	X	1403139	1453762	PAR1	Upregulated	Biallelic	#N/A	ASMTL		Upregulated	Biallelic	#N/A	ASMTL	Escape	ASMTL	ASMTL	PAR	bi-allelic	0	ASMTL	Upregulated	ASMTL	0.586382	ASMTL	Upregulated	ASMTL	PAR	ASMTL	1
ENSG00000236017	ASMTL-AS1	X	1401769	1414028	PAR1	Upregulated	Biallelic	#N/A	ASMTL-AS1		Upregulated	Biallelic	#N/A			ASMTL-AS1	ASMTL-AS1	unknown	bi-allelic	0							ASMTL-AS1	PAR	ASMTL-AS1	0
ENSG00000085185	BCORL1	X	129981107	130058083	Escape	Downregulated	Biallelic	#N/A						BCORL1	Inactive												BCORL1	S
ENSG00000182492	BGN	X	153494980	153509546	#N/A	Downregulated	#N/A	Monoallelic	BGN		Upregulated	#N/A	Monoallelic	BGN	Inactive	BGN	BGN	inactive	0	0							BGN	S	BGN	0
ENSG00000002586	CD99	X	2691187	2741309	PAR1	Upregulated	Biallelic	#N/A						CD99	Escape	CD99	CD99	PAR	0	bi-allelic			CD99	0.31505	CD99	Upregulated	CD99	PAR	CD99	1
ENSG00000008086	CDKL5	X	18425583	18653629	#N/A	Downregulated	#N/A	Monoallelic						CDKL5	Inactive												CDKL5	Mostly S	CDKL5	0
ENSG00000169084	DHRSX	X	2219506	2502805	PAR1	Upregulated	Biallelic	#N/A	DHRSX		Upregulated	Biallelic	#N/A	DHRSX	Escape	DHRSX	DHRSX	PAR	0	0	DHRSX	Upregulated	DHRSX	0.618005	DHRSX	Upregulated	DHRSX	PAR	DHRSX	1
ENSG00000173674	EIF1AX	X	20124525	20141838	#N/A	Upregulated	#N/A	Monoallelic						EIF1AX	Escape	EIF1AX	EIF1AX	escape	0	0	EIF1AX	Upregulated	EIF1AX	0.717534	EIF1AX	Upregulated	EIF1AX	E	EIF1AX	1
ENSG00000130054	FAM155B	X	69505241	69532508	S (Balaton et al, 2015)	Downregulated	#N/A	Monoallelic						FAM155B	Unknown												FAM155B	S	FAM155B	0
ENSG00000123575	FAM199X	X	104166453	104195902	#N/A	Upregulated	#N/A	Monoallelic						FAM199X	Inactive	FAM199X	FAM199X	inactive	bi-allelic	0							FAM199X	S	FAM199X	0
ENSG00000022267	FHL1	X	136146702	136211359	#N/A	Downregulated	#N/A	Monoallelic						FHL1	Inactive	FHL1	FHL1	inactive	bi-allelic	0							FHL1	Mostly S	FHL1	1
ENSG00000268089	GABRQ	X	152637895	152657542	S (Balaton et al, 2015)	Downregulated	#N/A	Monoallelic																			GABRQ	S
ENSG00000203879	GDI1	X	154436913	154443467	#N/A	Downregulated	#N/A	Monoallelic						GDI1	Inactive										GDI1	Upregulated	GDI1	S	GDI1	1
ENSG00000147257	GPC3	X	133535745	133985594	#N/A	Downregulated	#N/A	Monoallelic						GPC3	Inactive	GPC3	GPC3	inactive	mono-allelic	0							GPC3	S	GPC3	0
ENSG00000046653	GPM6B	X	13770939	13938638	#N/A	Upregulated	#N/A	Monoallelic						GPM6B	Escape	GPM6B	GPM6B	escape	0	0							GPM6B	Mostly E	GPM6B	1
ENSG00000189369	GSPT2	X	51743442	51746232	#N/A	Downregulated	#N/A	Monoallelic						GSPT2	Inactive										GSPT2	Upregulated	GSPT2	S
ENSG00000178605	GTPBP6	X	304529	318819	PAR1	Upregulated	Biallelic	#N/A						GTPBP6	Escape								GTPBP6	0.520741	GTPBP6	Upregulated	GTPBP6	PAR	GTPBP6	1
ENSG00000133124	IRS4	X	108732482	108736409	S (Balaton et al, 2015)	Downregulated	#N/A	Monoallelic								IRS4	IRS4	unknown	bi-allelic	0							IRS4	Mostly S	IRS4	0
ENSG00000225470	JPX	X	73944182	74070408	#N/A	Upregulated	#N/A	Monoallelic	JPX		Upregulated	#N/A	Monoallelic	JPX	Escape	JPX	JPX	escape	mono-allelic	mono-allelic	JPX	Upregulated	JPX	0.694555			JPX	E	JPX	1
ENSG00000102057	KCND1	X	48961378	48971844	#N/A	Downregulated	#N/A	Monoallelic	KCND1		Downregulated	#N/A	Monoallelic	KCND1	Inactive												KCND1	Mostly S	KCND1	0
ENSG00000147050	KDM6A	X	44873177	45112602	Escape	Upregulated	Biallelic	#N/A						KDM6A	Escape						KDM6A	Upregulated	KDM6A	0.941531	KDM6A	Upregulated	KDM6A	Mostly E	KDM6A	1
ENSG00000236871	LINC00106	X	1396427	1399402	PAR1	Upregulated	Biallelic	#N/A	LINC00106		Upregulated	#N/A	Monoallelic	LINC00106	Escape														LINC00106	1
ENSG00000147381	MAGEA4	X	151912509	151925170	Escape	Upregulated	Biallelic	#N/A																			MAGEA4	No call
ENSG00000189221	MAOA	X	43654907	43746824	#N/A	Downregulated	#N/A	Monoallelic						MAOA	Escape												MAOA	Mostly S	MAOA	1
ENSG00000129680	MAP7D3	X	136213220	136256482	#N/A	Downregulated	#N/A	Monoallelic						MAP7D3	Inactive	MAP7D3	MAP7D3	inactive	bi-allelic	mono-allelic							MAP7D3	S
ENSG00000101871	MID1	X	10445310	10833654	#N/A	Downregulated	#N/A	Monoallelic	MID1		Downregulated	#N/A	Monoallelic	MID1	Inactive	MID1	MID1	inactive	bi-allelic	0							MID1	Mostly S	MID1	0
ENSG00000133131	MORC4	X	106813871	107000212	Escape	Upregulated	Biallelic	#N/A						MORC4	Inactive	MORC4	MORC4	inactive	0	0							MORC4	Mostly S	MORC4	0
ENSG00000186310	NAP1L3	X	93670930	93673578	#N/A	Upregulated	#N/A	Monoallelic	NAP1L3		Upregulated	#N/A	Monoallelic	NAP1L3	Escape	NAP1L3	NAP1L3	escape	0	0							NAP1L3	Mostly E	NAP1L3	1
ENSG00000188158	NHS	X	17375420	17735994	#N/A	Downregulated	#N/A	Monoallelic						NHS	Variable												NHS	Mostly VE	NHS	1
ENSG00000146938	NLGN4X	X	5840637	6228867	Escape	Upregulated	Biallelic	#N/A	NLGN4X		Upregulated	#N/A	Monoallelic	NLGN4X	Variable												NLGN4X	Mostly E	NLGN4X	1
ENSG00000172943	PHF8	X	53936676	54048958	#N/A	Downregulated	#N/A	Monoallelic						PHF8	Inactive												PHF8	S	PHF8	1
ENSG00000182378	PLCXD1	X	276322	303356	PAR1	Upregulated	Biallelic	#N/A	PLCXD1		Upregulated	Biallelic	#N/A	PLCXD1	Escape	PLCXD1	PLCXD1	PAR	0	0			PLCXD1	0.4547	PLCXD1	Upregulated	PLCXD1	PAR	PLCXD1	1
ENSG00000102007	PLP2	X	49171898	49175235	#N/A	Downregulated	#N/A	Monoallelic	PLP2		Downregulated	#N/A	Monoallelic	PLP2	Inactive												PLP2	S	PLP2	0
ENSG00000130822	PNCK	X	153669730	153689010	#N/A	Downregulated	#N/A	Monoallelic						PNCK	Variable												PNCK	S	PNCK	1
ENSG00000167393	PPP2R3B	X	333933	386955	PAR1	Upregulated	Biallelic	#N/A	PPP2R3B		Upregulated	Biallelic	#N/A	PPP2R3B	Escape	PPP2R3B	PPP2R3B	PAR	bi-allelic	0	PPP2R3B	Upregulated	PPP2R3B	0.621259	PPP2R3B	Upregulated	PPP2R3B	PAR	PPP2R3B	1
ENSG00000012211	PRICKLE3	X	49174802	49186528	#N/A	Downregulated	#N/A	Monoallelic	PRICKLE3		Downregulated	#N/A	Monoallelic	PRICKLE3	Inactive												PRICKLE3	S
ENSG00000130032	PRRG3	X	151694658	151705924	Mostly S (Balaton et al, 2015)	Downregulated	#N/A	Monoallelic						PRRG3	Unknown												PRRG3	Mostly S	PRRG3	0
ENSG00000101843	PSMD10	X	108084207	108091549	#N/A	Upregulated	#N/A	Monoallelic						PSMD10	Inactive												PSMD10	S	PSMD10	0
ENSG00000130021	PUDP	X	6667865	7148190	Escape	Upregulated	Biallelic	#N/A	PUDP		Upregulated	Biallelic	#N/A	HDHD1	Escape	PUDP	PUDP	#N/A	#N/A	#N/A	PUDP	Upregulated	HDHD1	0.590854					PUDP	1
ENSG00000072133	RPS6KA6	X	84058346	84188199	#N/A	Upregulated	#N/A	Monoallelic						RPS6KA6	Inactive												RPS6KA6	S	RPS6KA6	0
ENSG00000130066	SAT1	X	23783173	23786226	#N/A	Downregulated	#N/A	Monoallelic						SAT1	Inactive	SAT1	SAT1	inactive	bi-allelic	0					SAT1	Upregulated	SAT1	S	SAT1	1
ENSG00000102098	SCML2	X	18239313	18354688	#N/A	Downregulated	#N/A	Monoallelic						SCML2	Inactive	SCML2	SCML2	inactive	0	0							SCML2	Mostly S	SCML2	0
ENSG00000147010	SH3KBP1	X	19533977	19887600	#N/A	Downregulated	#N/A	Monoallelic						SH3KBP1	Inactive												SH3KBP1	Mostly S	SH3KBP1	1
ENSG00000169100	SLC25A6	X	1386152	1392113	PAR1	Upregulated	Biallelic	#N/A	SLC25A6		Upregulated	Biallelic	#N/A	SLC25A6	Escape	SLC25A6	SLC25A6	PAR	0	bi-allelic	SLC25A6	Upregulated	SLC25A6	0.611034	SLC25A6	Upregulated	SLC25A6	PAR	SLC25A6	1
ENSG00000101955	SRPX	X	38149336	38220924	#N/A	Downregulated	#N/A	Monoallelic						SRPX	Variable	SRPX	SRPX	variable	0	0							SRPX	S	SRPX	1
ENSG00000101846	STS	X	7147237	7804358	#N/A	Upregulated	#N/A	Monoallelic						STS	Escape	STS	STS	escape	0	0							STS	E	STS	1
ENSG00000169895	SYAP1	X	16719612	16765340	Escape	Upregulated	Biallelic	#N/A	SYAP1		Upregulated	Biallelic	#N/A	SYAP1	Escape								SYAP1	0.320305	SYAP1	Upregulated	SYAP1	E	SYAP1	1
ENSG00000184905	TCEAL2	X	102125679	102140426	#N/A	Downregulated	#N/A	Monoallelic						TCEAL2	Inactive										TCEAL2	Upregulated	TCEAL2	S	TCEAL2	0
ENSG00000133142	TCEAL4	X	103576231	103587736	#N/A	Downregulated	#N/A	Monoallelic						TCEAL4	Inactive	TCEAL4	TCEAL4	inactive	mono-allelic	0					TCEAL4	Upregulated	TCEAL4	S	TCEAL4	1
ENSG00000126953	TIMM8A	X	101345661	101348742	#N/A	Upregulated	#N/A	Monoallelic						TIMM8A	Inactive										TIMM8A	Upregulated	TIMM8A	Mostly S
ENSG00000156298	TSPAN7	X	38561370	38688920	#N/A	Downregulated	#N/A	Monoallelic						TSPAN7	Inactive												TSPAN7	Mostly S	TSPAN7	0
ENSG00000184205	TSPYL2	X	53082367	53088540	#N/A	Downregulated	#N/A	Monoallelic						TSPYL2	Inactive										TSPYL2	Upregulated	TSPYL2	S
ENSG00000102178	UBL4A	X	154483717	154486615	#N/A	Upregulated	#N/A	Monoallelic						UBL4A	Inactive	UBL4A	UBL4A	inactive	0	0							UBL4A	S	UBL4A	1
ENSG00000247746	USP51	X	55484616	55489202	S (Balaton et al, 2015)	Downregulated	#N/A	Monoallelic						USP51	Unknown												USP51	S
ENSG00000047644	WWC3	X	10015562	10144478	#N/A	Downregulated	#N/A	Monoallelic						WWC3	Inactive	WWC3	WWC3	inactive	mono-allelic	0					WWC3	Upregulated	WWC3	Mostly S	WWC3	1
ENSG00000229807	XIST	X	73820649	73852723	Escape	Upregulated	Biallelic	#N/A	XIST		Upregulated	Biallelic	#N/A	XIST	Escape	XIST	XIST	escape	0	0	XIST	Upregulated	XIST	12.8615	XIST	Upregulated	XIST	Mostly S	XIST	1
ENSG00000214717	ZBED1	X	2486414	2500976	PAR1	Upregulated	Biallelic	#N/A	ZBED1		Upregulated	Biallelic	#N/A	ZBED1	Escape						ZBED1	Upregulated	ZBED1	0.491025			ZBED1	PAR	ZBED1	1
ENSG00000005889	ZFX	X	24149173	24216255	Escape	Upregulated	Biallelic	#N/A						ZFX	Escape						ZFX	Upregulated	ZFX	0.590569	ZFX	Upregulated	ZFX	E	ZFX	1
ENSG00000147394	ZNF185	X	152914442	152973480	#N/A	Downregulated	#N/A	Monoallelic						ZNF185	Inactive												ZNF185	Mostly S	ZNF185	0
ENSG00000131269														ABCB7	Inactive												ABCB7	Mostly S	ABCB7	1
ENSG00000279413																													AC112497.1	0
ENSG00000130234														ACE2	Escape												ACE2	E	ACE2	1
ENSG00000123130									ACOT9		Upregulated	#N/A	Monoallelic	ACOT9	Inactive	ACOT9	ACOT9	inactive	0	0							ACOT9	S	ACOT9	1
ENSG00000068366														ACSL4	Inactive												ACSL4	S	ACSL4	0
ENSG00000173698									ADGRG2		Upregulated	#N/A	Monoallelic	GPR64	Inactive	GPR64	GPR64	inactive	bi-allelic	0									ADGRG2	0
ENSG00000156920														GPR112	Escape														ADGRG4	1
ENSG00000155966														AFF2	Variable												AFF2	Mostly S	AFF2	1
ENSG00000156709														AIFM1	Inactive	AIFM1	AIFM1	inactive	0	0							AIFM1	S	AIFM1	1
ENSG00000158578														ALAS2	Inactive												ALAS2	S	ALAS2	0
ENSG00000101901														ALG13	Variable	ALG13	ALG13	variable	0	0							ALG13	VE	ALG13	1
ENSG00000229487																													ALG13-AS1	0
ENSG00000101935														AMMECR1	Inactive	AMMECR1	AMMECR1	inactive	bi-allelic	0							AMMECR1	S	AMMECR1	0
ENSG00000126016														AMOT	Inactive												AMOT	S	AMOT	1
ENSG00000011201														KAL1	Escape	KAL1	KAL1	escape	bi-allelic	0									ANOS1	1
ENSG00000169188														APEX2	Inactive	APEX2	APEX2	inactive	0	mono-allelic							APEX2	S	APEX2	1
ENSG00000184831														APOO	Inactive	APOO	APOO	inactive	0	0							APOO	S	APOO	1
ENSG00000169083														AR	Inactive												AR	Mostly S	AR	0
ENSG00000089820														ARHGAP4	Variable												ARHGAP4	Discordant	ARHGAP4	1
ENSG00000047648														ARHGAP6	Inactive												ARHGAP6	Mostly S	ARHGAP6	0
ENSG00000129675														ARHGEF6	Inactive												ARHGEF6	S	ARHGEF6	0
ENSG00000184867														ARMCX2	Inactive	ARMCX2	ARMCX2	inactive	bi-allelic	0							ARMCX2	S	ARMCX2	1
ENSG00000102401														ARMCX3	Inactive	ARMCX3	ARMCX3	inactive	bi-allelic	0							ARMCX3	S	ARMCX3	1
ENSG00000196440														ARMCX4	Inactive												ARMCX4	Mostly S	ARMCX4	0
ENSG00000198960														ARMCX6	Inactive												ARMCX6	S	ARMCX6	0
ENSG00000006756									ARSD		Upregulated	Biallelic	#N/A	ARSD	Escape								ARSD	0.378995			ARSD	Mostly E	ARSD	1
ENSG00000157399														ARSE	Escape														ARSE	1
ENSG00000062096														ARSF	Escape												ARSF	No call	ARSF	1
ENSG00000205667														ARSH	Escape												ARSH	E	ARSH	1
ENSG00000198881														ASB12	Inactive												ASB12	S	ASB12	0
ENSG00000196433														ASMT	Escape	ASMT	ASMT	PAR	bi-allelic	bi-allelic							ASMT	PAR	ASMT	1
ENSG00000101844														ATG4A	Inactive												ATG4A	Mostly S	ATG4A	0
ENSG00000101974														ATP11C	Inactive	ATP11C	ATP11C	inactive	bi-allelic	mono-allelic							ATP11C	S	ATP11C	1
ENSG00000071553														ATP6AP1	Inactive												ATP6AP1	S	ATP6AP1	1
ENSG00000182220														ATP6AP2	Inactive	ATP6AP2	ATP6AP2	inactive	0	0							ATP6AP2	Mostly S	ATP6AP2	1
ENSG00000165240														ATP7A	Variable												ATP7A	Mostly S	ATP7A	1
ENSG00000126895														AVPR2	Variable												AVPR2	Discordant	AVPR2	1
ENSG00000185825														BCAP31	Inactive												BCAP31	Mostly S	BCAP31	1
ENSG00000183337														BCOR	Inactive	BCOR	BCOR	inactive	0	0							BCOR	Mostly S	BCOR	1
ENSG00000177324														BEND2	Variable								BEND2	-0.795071			BEND2	VE	BEND2	1
ENSG00000166681														NGFRAP1	Inactive														BEX3	0
ENSG00000102409														BEX4	Inactive	BEX4	BEX4	inactive	bi-allelic	mono-allelic							BEX4	S	BEX4	0
ENSG00000184515														BEX5	Unknown												BEX5	No call	BEX5	0
ENSG00000102010														BMX	Variable												BMX	No call	BMX	1
ENSG00000185515														BRCC3	Inactive												BRCC3	Mostly S	BRCC3	1
ENSG00000223723																													BX842568.2	0
ENSG00000171155														C1GALT1C1	Inactive	C1GALT1C1	C1GALT1C1	inactive	0	0							C1GALT1C1	S	C1GALT1C1	1
ENSG00000169239														CA5B	Escape								CA5B	0.204846			CA5B	Mostly E	CA5B	1
ENSG00000186312																							CA5BP1	0.408438			CA5BP1	E	CA5BP1	1
ENSG00000102001														CACNA1F	Inactive												CACNA1F	S	CACNA1F	0
ENSG00000077274									CAPN6		Upregulated	#N/A	Monoallelic	CAPN6	Inactive	CAPN6	CAPN6	inactive	0	mono-allelic							CAPN6	S	CAPN6	0
ENSG00000147044														CASK	Inactive												CASK	S	CASK	0
ENSG00000147144														CCDC120	Inactive												CCDC120	S	CCDC120	1
ENSG00000203952														CCDC160	Unknown												CCDC160	S	CCDC160	0
ENSG00000101997														CCDC22	Inactive												CCDC22	S	CCDC22	1
ENSG00000147082														CCNB3	Inactive												CCNB3	Mostly S	CCNB3	0
ENSG00000102181									CD99L2		Upregulated	#N/A	Monoallelic	CD99L2	Inactive	CD99L2	CD99L2	inactive	0	0							CD99L2	S	CD99L2	1
ENSG00000223773																CD99P1	CD99P1	unknown	0	bi-allelic			CD99P1	0.576299			CD99P1	PAR	CD99P1	0
ENSG00000102225									CDK16		Upregulated	Biallelic	#N/A	CDK16	Escape								CDK16	0.278049			CDK16	Mostly E	CDK16	1
ENSG00000102384														CENPI	Inactive												CENPI	S	CENPI	0
ENSG00000204116														CHIC1	Inactive												CHIC1	S	CHIC1	0
ENSG00000188419														CHM	Inactive												CHM	Discordant	CHM	1
ENSG00000278530																													CHMP1B2P	0
ENSG00000101938														CHRDL1	Inactive	CHRDL1	CHRDL1	inactive	bi-allelic	0							CHRDL1	S	CHRDL1	0
ENSG00000147119														CHST7	Inactive												CHST7	S	CHST7	0
ENSG00000125931														CITED1	Inactive												CITED1	Discordant	CITED1	1
ENSG00000073464									CLCN4		Downregulated	#N/A	Monoallelic	CLCN4	Inactive												CLCN4	Mostly S	CLCN4	1
ENSG00000155962														CLIC2	Inactive												CLIC2	Mostly S	CLIC2	1
ENSG00000149970														CNKSR2	Variable												CNKSR2	Mostly S	CNKSR2	1
ENSG00000188153														COL4A5	Inactive												COL4A5	S	COL4A5	0
ENSG00000197565														COL4A6	Variable	COL4A6	COL4A6	variable	bi-allelic	0							COL4A6	Mostly VE	COL4A6	1
ENSG00000131174														COX7B	Variable												COX7B	VE	COX7B	1
ENSG00000205755																											CRLF2	PAR	CRLF2	0
ENSG00000198930																											CSAG1	No call	CSAG1	0
ENSG00000198223														CSF2RA	Escape												CSF2RA	PAR	CSF2RA	1
ENSG00000101811														CSTF2	Inactive												CSTF2	S	CSTF2	0
ENSG00000269586																													CT45A10	0
ENSG00000230162																													CT45A11P	0
ENSG00000047230									CTPS2		Upregulated	#N/A	Monoallelic	CTPS2	Variable	CTPS2	CTPS2	variable	bi-allelic	0							CTPS2	Mostly E	CTPS2	1
ENSG00000158290														CUL4B	Inactive												CUL4B	Mostly S	CUL4B	1
ENSG00000186810														CXCR3	Inactive												CXCR3	S	CXCR3	0
ENSG00000120280														CXorf21	Variable														CXorf21	1
ENSG00000173681														CXorf23	Inactive														CXorf23	1
ENSG00000147113														CXorf36	Inactive														CXorf36	0
ENSG00000185753														CXorf38	Escape	CXorf38	CXorf38	escape	0	0			CXorf38	0.318277			CXorf38	E	CXorf38	1
ENSG00000197620														CXorf40A	Inactive	CXorf40A	CXorf40A	inactive	bi-allelic	bi-allelic									CXorf40A	1
ENSG00000018610														CXorf56	Inactive	CXorf56	CXorf56	inactive	0	0									CXorf56	1
ENSG00000147231														CXorf57	Inactive								CXorf57	-0.790113					CXorf57	0
ENSG00000204165														CXorf65	Variable												CXorf65	VE	CXorf65	1
ENSG00000187690														CXorf67	Inactive														CXorf67	0
ENSG00000173198														CYSLTR1	Inactive												CYSLTR1	S	CYSLTR1	0
ENSG00000126733														DACH2	Variable												DACH2	Discordant	DACH2	1
ENSG00000198889														DCAF12L1	Unknown												DCAF12L1	No call	DCAF12L1	0
ENSG00000198354														DCAF12L2	Unknown												DCAF12L2	S	DCAF12L2	0
ENSG00000215301														DDX3X	Escape	DDX3X	DDX3X	escape	bi-allelic	mono-allelic			DDX3X	0.465962			DDX3X	E	DDX3X	1
ENSG00000274588																DGKK	DGKK	unknown	bi-allelic	0							DGKK	S	DGKK	0
ENSG00000223571																													DHRSX-IT1	0
ENSG00000147202														DIAPH2	Inactive												DIAPH2	Discordant	DIAPH2	1
ENSG00000082458														DLG3	Inactive												DLG3	S	DLG3	1
ENSG00000198947														DMD	Inactive												DMD	S	DMD	1
ENSG00000013563														DNASE1L1	Inactive	DNASE1L1	DNASE1L1	inactive	0	0							DNASE1L1	S	DNASE1L1	1
ENSG00000147251														DOCK11	Inactive	DOCK11	DOCK11	inactive	0	0							DOCK11	Mostly S	DOCK11	1
ENSG00000102385														DRP2	Inactive												DRP2	S	DRP2	1
ENSG00000165169														DYNLT3	Inactive	DYNLT3	DYNLT3	inactive	0	0							DYNLT3	S	DYNLT3	0
ENSG00000158813									EDA		Downregulated	#N/A	Monoallelic	EDA	Inactive												EDA	Mostly S	EDA	1
ENSG00000131080														EDA2R	Inactive												EDA2R	Discordant	EDA2R	1
ENSG00000234785																													EEF1GP5	0
ENSG00000183690														EFHC2	Variable												EFHC2	Discordant	EFHC2	1
ENSG00000090776									EFNB1		Upregulated	#N/A	Monoallelic	EFNB1	Inactive												EFNB1	Mostly S	EFNB1	1
ENSG00000198759														EGFL6	Inactive												EGFL6	S	EGFL6	0
ENSG00000130741														EIF2S3	Escape	EIF2S3	EIF2S3	escape	0	0			EIF2S3	0.430975			EIF2S3	E	EIF2S3	1
ENSG00000126767														ELK1	Inactive												ELK1	S	ELK1	1
ENSG00000186871														ERCC6L	Inactive												ERCC6L	S	ERCC6L	1
ENSG00000185010														F8	Inactive												F8	S	F8	0
ENSG00000165591														FAAH2	Inactive												FAAH2	S	FAAH2	1
ENSG00000184083														FAM120C	Inactive												FAM120C	S	FAM120C	0
ENSG00000203950														FAM127B	Inactive														FAM127B	0
ENSG00000212747									RTL8B		Upregulated	Biallelic	#N/A	FAM127C	Unknown														FAM127C	0
ENSG00000179083														FAM133A	Inactive												FAM133A	S	FAM133A	0
ENSG00000174028																													FAM3C2	0
ENSG00000071859														FAM50A	Inactive												FAM50A	S	FAM50A	1
ENSG00000262919																													FAM58A	1
ENSG00000187268														FAM9C	Escape												FAM9C	E	FAM9C	1
ENSG00000181544														FANCB	Inactive												FANCB	S	FANCB	1
ENSG00000102302														FGD1	Inactive	FGD1	FGD1	inactive	0	0							FGD1	Mostly S	FGD1	1
ENSG00000129682														FGF13	Variable												FGF13	Mostly S	FGF13	1
ENSG00000226031																													FGF13-AS1	0
ENSG00000196468														FGF16	Unknown												FGF16	No call	FGF16	0
ENSG00000213468														RP11-453F18__B.1	Variable	LOC286467	LOC286467	unknown	bi-allelic	0							FIRRE	VE	FIRRE	1
ENSG00000196924														FLNA	Inactive								FLNA	-0.209454			FLNA	S	FLNA	1
ENSG00000102081														FMR1	Inactive	FMR1	FMR1	inactive	0	0							FMR1	S	FMR1	0
ENSG00000184481														FOXO4	Variable												FOXO4	VE	FOXO4	1
ENSG00000049768														FOXP3	Inactive												FOXP3	S	FOXP3	0
ENSG00000165694														FRMD7	Variable												FRMD7	VE	FRMD7	1
ENSG00000147234														FRMPD3	Variable														FRMPD3	1
ENSG00000232368																													FTLP2	0
ENSG00000068438														FTSJ1	Inactive												FTSJ1	S	FTSJ1	1
ENSG00000230590														FTX	Inactive												FTX	S	FTX	1
ENSG00000069509														FUNDC1	Escape	FUNDC1	FUNDC1	escape	0	0							FUNDC1	E	FUNDC1	1
ENSG00000165775														FUNDC2	Inactive												FUNDC2	S	FUNDC2	0
ENSG00000160211														G6PD	Inactive												G6PD	S	G6PD	1
ENSG00000011677														GABRA3	Variable												GABRA3	Discordant	GABRA3	1
ENSG00000102287														GABRE	Variable	GABRE	GABRE	variable	0	0							GABRE	S	GABRE	1
ENSG00000147174														ACRC	Inactive														GCNA	0
ENSG00000130055														GDPD2	Unknown												GDPD2	No call	GDPD2	0
ENSG00000046647														GEMIN8	Escape												GEMIN8	Mostly E	GEMIN8	1
ENSG00000169562														GJB1	Unknown												GJB1	No call	GJB1	0
ENSG00000198814														GK	Inactive												GK	S	GK	0
ENSG00000171433														GLOD5	Unknown												GLOD5	No call	GLOD5	0
ENSG00000182890														GLUD2	Inactive	GLUD2	GLUD2	inactive	0	0							GLUD2	S	GLUD2	0
ENSG00000130119														GNL3L	Inactive												GNL3L	Mostly S	GNL3L	0
ENSG00000068394														GPKOW	Inactive												GPKOW	Mostly S	GPKOW	1
ENSG00000165370																											GPR101	S	GPR101	0
ENSG00000101850														GPR143	Variable	GPR143	GPR143	variable	bi-allelic	0							GPR143	Mostly S	GPR143	1
ENSG00000184194														GPR173	Inactive												GPR173	Mostly S	GPR173	1
ENSG00000171659														GPR34	Inactive												GPR34	S	GPR34	0
ENSG00000125675														GRIA3	Variable												GRIA3	Mostly S	GRIA3	1
ENSG00000068400														GRIPAP1	Inactive	GRIPAP1	GRIPAP1	inactive	0	mono-allelic							GRIPAP1	S	GRIPAP1	1
ENSG00000126010									GRPR		Upregulated	Biallelic	#N/A	GRPR	Variable	GRPR	GRPR	variable	bi-allelic	0							GRPR	Mostly VE	GRPR	1
ENSG00000260822																													GS1-358P8.4	0
ENSG00000101890																											GUCY2F	VE	GUCY2F	0
ENSG00000056998									GYG2		Upregulated	Biallelic	#N/A	GYG2	Escape	GYG2	GYG2	escape	bi-allelic	bi-allelic							GYG2	Mostly E	GYG2	1
ENSG00000213397														HAUS7	Inactive	HAUS7	HAUS7	inactive	0	0							HAUS7	S	HAUS7	1
ENSG00000172534									HCFC1		Downregulated	#N/A	Monoallelic	HCFC1	Variable	HCFC1	HCFC1	variable	mono-allelic	0							HCFC1	Mostly VE	HCFC1	1
ENSG00000094631														HDAC6	Inactive												HDAC6	Mostly S	HDAC6	0
ENSG00000147099														HDAC8	Inactive												HDAC8	S	HDAC8	0
ENSG00000089472									HEPH		Upregulated	#N/A	Monoallelic	HEPH	Inactive	HEPH	HEPH	inactive	0	mono-allelic							HEPH	S	HEPH	0
ENSG00000029993														HMGB3	Inactive	HMGB3	HMGB3	inactive	bi-allelic	0							HMGB3	S	HMGB3	0
ENSG00000198157														HMGN5	Variable												HMGN5	Discordant	HMGN5	1
ENSG00000165704									HPRT1		Downregulated	#N/A	Monoallelic	HPRT1	Inactive												HPRT1	S	HPRT1	0
ENSG00000171004														HS6ST2	Escape	HS6ST2	HS6ST2	escape	0	0							HS6ST2	Discordant	HS6ST2	1
ENSG00000072506														HSD17B10	Inactive												HSD17B10	Mostly S	HSD17B10	0
ENSG00000171116																											HSFX1	No call	HSFX1	0
ENSG00000268738																											HSFX2	No call	HSFX2	0
ENSG00000067829														IDH3G	Inactive												IDH3G	S	IDH3G	1
ENSG00000010404														IDS	Inactive	IDS	IDS	inactive	mono-allelic	mono-allelic							IDS	S	IDS	1
ENSG00000089289														IGBP1	Inactive												IGBP1	Mostly S	IGBP1	1
ENSG00000147255														IGSF1	Inactive	IGSF1	IGSF1	inactive	bi-allelic	mono-allelic							IGSF1	S	IGSF1	0
ENSG00000269335																											IKBKG	Mostly S	IKBKG	1
ENSG00000131724														IL13RA1	Inactive												IL13RA1	Mostly S	IL13RA1	0
ENSG00000189108														IL1RAPL2	Variable												IL1RAPL2	Discordant	IL1RAPL2	1
ENSG00000147168														IL2RG	Unknown												IL2RG	No call	IL2RG	0
ENSG00000185291														IL3RA	Escape												IL3RA	PAR	IL3RA	1
ENSG00000124334														IL9R	Variable												IL9R	S	IL9R	1
ENSG00000224975																							INE1	0.602455			INE1	E	INE1	0
ENSG00000124313														IQSEC2	Escape												IQSEC2	Mostly E	IQSEC2	1
ENSG00000184216														IRAK1	Inactive	IRAK1	IRAK1	inactive	mono-allelic	0							IRAK1	Mostly S	IRAK1	1
ENSG00000147166														ITGB1BP2	Inactive												ITGB1BP2	No call	ITGB1BP2	1
ENSG00000078596														ITM2A	Inactive												ITM2A	Discordant	ITM2A	1
ENSG00000102221														PHF16	Inactive														JADE3	0
ENSG00000232593									KANTR		Downregulated	#N/A	Monoallelic	RP11-258C19.5	Inactive														KANTR	0
ENSG00000176076																													KCNE5	0
ENSG00000126012														KDM5C	Escape								KDM5C	0.64262			KDM5C	Mostly E	KDM5C	1
ENSG00000235262																													KDM5C-IT1	0
ENSG00000050030														KIAA2022	Inactive														KIAA2022	0
ENSG00000102349														KLF8	Inactive												KLF8	S	KLF8	0
ENSG00000003096														KLHL13	Inactive												KLHL13	Mostly S	KLHL13	0
ENSG00000174010														KLHL15	Inactive	KLHL15	KLHL15	inactive	bi-allelic	0							KLHL15	S	KLHL15	0
ENSG00000102271									KLHL4		Upregulated	Biallelic	#N/A	KLHL4	Inactive	KLHL4	KLHL4	inactive	0	0							KLHL4	No call	KLHL4	1
ENSG00000198910									L1CAM		Downregulated	#N/A	Monoallelic	L1CAM	Variable												L1CAM	Mostly E	L1CAM	1
ENSG00000196976														LAGE3	Inactive	LAGE3	LAGE3	inactive	0	0							LAGE3	S	LAGE3	0
ENSG00000005893														LAMP2	Inactive	LAMP2	LAMP2	inactive	0	0							LAMP2	Mostly S	LAMP2	1
ENSG00000147036														LANCL3	Variable												LANCL3	Mostly S	LANCL3	1
ENSG00000001497														LAS1L	Inactive												LAS1L	S	LAS1L	1
ENSG00000182195														LDOC1	Inactive												LDOC1	S	LDOC1	0
ENSG00000182508														LHFPL1	Inactive												LHFPL1	Discordant	LHFPL1	0
ENSG00000230542																LINC00102	LINC00102	unknown	0	0							LINC00102	PAR	LINC00102	0
ENSG00000227060														LINC00629	Unknown														LINC00629	0
ENSG00000203930														LINC00632	Unknown														LINC00632	0
ENSG00000226179																													LINC00685	0
ENSG00000260802														LINC00890	Unknown	LINC00890	LINC00890	unknown	0	0									LINC00890	0
ENSG00000235703																													LINC00894	0
ENSG00000270012														LL0XNC01-7P3.1	Unknown														LL0XNC01-7P3.1	0
ENSG00000165509														MAGEC3	Escape												MAGEC3	No call	MAGEC3	1
ENSG00000179222														MAGED1	Inactive	MAGED1	MAGED1	inactive	mono-allelic	0							MAGED1	S	MAGED1	1
ENSG00000198934									MAGEE1		Upregulated	#N/A	Monoallelic	MAGEE1	Variable												MAGEE1	Discordant	MAGEE1	1
ENSG00000186675														MAGEE2	Unknown												MAGEE2	No call	MAGEE2	0
ENSG00000187601														MAGEH1	Inactive	MAGEH1	MAGEH1	inactive	0	0							MAGEH1	S	MAGEH1	1
ENSG00000269313																											MAGIX	Mostly S	MAGIX	0
ENSG00000102158														MAGT1	Inactive												MAGT1	S	MAGT1	0
ENSG00000013619														MAMLD1	Inactive	MAMLD1	MAMLD1	inactive	0	0							MAMLD1	Mostly S	MAMLD1	0
ENSG00000069535														MAOB	Inactive												MAOB	S	MAOB	0
ENSG00000184368														MAP7D2	Inactive												MAP7D2	Discordant	MAP7D2	1
ENSG00000076770														MBNL3	Inactive												MBNL3	Mostly S	MBNL3	1
ENSG00000012174														MBTPS2	Inactive	MBTPS2	MBTPS2	inactive	0	0							MBTPS2	S	MBTPS2	0
ENSG00000101977														MCF2	Inactive												MCF2	S	MCF2	0
ENSG00000232119														MCTS1	Inactive												MCTS1	S	MCTS1	1
ENSG00000169057														MECP2	Inactive												MECP2	S	MECP2	1
ENSG00000184634														MED12	Inactive	MED12	MED12	inactive	mono-allelic	mono-allelic							MED12	S	MED12	1
ENSG00000180182														MED14	Escape	MED14	MED14	escape	0	0							MED14	VE	MED14	1
ENSG00000234636																													MED14OS	0
ENSG00000165175														MID1IP1	Inactive												MID1IP1	S	MID1IP1	1
ENSG00000080561														MID2	Variable												MID2	Mostly S	MID2	1
ENSG00000207870																											MIR221	No call	MIR221	0
ENSG00000270069														RP6-99M1.2	Escape														MIR222HG	1
ENSG00000280870																													MIR325HG	0
ENSG00000123562									MORF4L2		Upregulated	#N/A	Monoallelic	MORF4L2	Inactive	MORF4L2	MORF4L2	inactive	0	0							MORF4L2	Mostly S	MORF4L2	1
ENSG00000101928														MOSPD1	Inactive												MOSPD1	S	MOSPD1	0
ENSG00000130830														MPP1	Inactive												MPP1	S	MPP1	1
ENSG00000005302														MSL3	Escape												MSL3	Discordant	MSL3	1
ENSG00000147065														MSN	Inactive	MSN	MSN	inactive	mono-allelic	0							MSN	S	MSN	0
ENSG00000171100														MTM1	Inactive												MTM1	S	MTM1	0
ENSG00000232177																													MTND4P24	0
ENSG00000157502														MUM1L1	Inactive														MUM1L1	0
ENSG00000101825														MXRA5	Escape	MXRA5	MXRA5	escape	0	0							MXRA5	Mostly E	MXRA5	1
ENSG00000102030														NAA10	Variable								NAA10	0.151222			NAA10	Mostly VE	NAA10	1
ENSG00000186462														NAP1L2	Inactive												NAP1L2	S	NAP1L2	0
ENSG00000204118														NAP1L6	Unknown														NAP1L6	0
ENSG00000204272																LOC550643	LOC550643	unknown	0	0									NBDY	1
ENSG00000204131														NHSL2	Variable												NHSL2	Discordant	NHSL2	1
ENSG00000186416														NKRF	Inactive								NKRF	0.225383			NKRF	S	NKRF	1
ENSG00000196338														NLGN3	Inactive												NLGN3	S	NLGN3	1
ENSG00000147140														NONO	Inactive	NONO	NONO	inactive	0	0							NONO	Mostly S	NONO	1
ENSG00000007952														NOX1	Escape												NOX1	No call	NOX1	1
ENSG00000169297									NR0B1		Upregulated	#N/A	Monoallelic	NR0B1	Escape												NR0B1	S	NR0B1	1
ENSG00000123572														NRK	Inactive												NRK	S	NRK	0
ENSG00000147383														NSDHL	Inactive												NSDHL	S	NSDHL	1
ENSG00000122824														NUDT10	Inactive	NUDT10	NUDT10	inactive	bi-allelic	0							NUDT10	S	NUDT10	0
ENSG00000196368														NUDT11	Inactive												NUDT11	S	NUDT11	0
ENSG00000198088														NUP62CL	Variable												NUP62CL	Mostly S	NUP62CL	1
ENSG00000147206														NXF3	Variable												NXF3	VE	NXF3	1
ENSG00000101888														NXT2	Inactive	NXT2	NXT2	inactive	0	0							NXT2	Mostly S	NXT2	1
ENSG00000046651														OFD1	Escape	OFD1	OFD1	escape	bi-allelic	0							OFD1	Mostly E	OFD1	1
ENSG00000079482														OPHN1	Inactive												OPHN1	S	OPHN1	0
ENSG00000036473														OTC	Variable												OTC	S	OTC	1
ENSG00000068308														OTUD5	Inactive												OTUD5	S	OTUD5	1
ENSG00000078589														P2RY10	Variable												P2RY10	VE	P2RY10	1
ENSG00000182162														P2RY8	Escape								P2RY8	0.586153			P2RY8	PAR	P2RY8	1
ENSG00000186288														PABPC1L2A	Unknown												PABPC1L2A	No call	PABPC1L2A	0
ENSG00000174740														PABPC5	Unknown												PABPC5	Mostly VE	PABPC5	1
ENSG00000101951														PAGE4	Unknown												PAGE4	No call	PAGE4	0
ENSG00000102290									PCDH11X		Upregulated	Biallelic	#N/A	PCDH11X	Variable	PCDH11X	PCDH11X	variable	0	0							PCDH11X	Discordant	PCDH11X	1
ENSG00000102109														PCSK1N	Unknown												PCSK1N	S	PCSK1N	0
ENSG00000102230														PCYT1B	Inactive	PCYT1B	PCYT1B	inactive	bi-allelic	0			PCYT1B	-0.680657			PCYT1B	S	PCYT1B	0
ENSG00000131828														PDHA1	Inactive												PDHA1	S	PDHA1	1
ENSG00000067992														PDK3	Inactive	PDK3	PDK3	inactive	bi-allelic	0							PDK3	S	PDK3	1
ENSG00000120509														PDZD11	Unknown												PDZD11	Mostly S	PDZD11	0
ENSG00000067840														PDZD4	Inactive												PDZD4	Discordant	PDZD4	1
ENSG00000158571														PFKFB1	Inactive												PFKFB1	Discordant	PFKFB1	0
ENSG00000102144														PGK1	Inactive												PGK1	S	PGK1	1
ENSG00000101856														PGRMC1	Inactive												PGRMC1	S	PGRMC1	1
ENSG00000102174														PHEX	Variable												PHEX	VE	PHEX	1
ENSG00000224204																													PHEX-AS1	0
ENSG00000067177									PHKA1		Upregulated	#N/A	Monoallelic	PHKA1	Inactive												PHKA1	Mostly S	PHKA1	0
ENSG00000044446														PHKA2	Inactive	PHKA2	PHKA2	inactive	bi-allelic	0							PHKA2	Mostly S	PHKA2	1
ENSG00000102309														PIN4	Inactive	PIN4	PIN4	inactive	bi-allelic	0							PIN4	Discordant	PIN4	1
ENSG00000087842														PIR	Variable	PIR	PIR	#N/A	#N/A	#N/A							PIR	Discordant	PIR	1
ENSG00000181191														PJA1	Inactive	PJA1	PJA1	inactive	0	mono-allelic							PJA1	S	PJA1	1
ENSG00000102024														PLS3	Variable												PLS3	Mostly VE	PLS3	1
ENSG00000130827														PLXNA3	Inactive	PLXNA3	PLXNA3	inactive	0	0							PLXNA3	S	PLXNA3	1
ENSG00000198753														PLXNB3	Escape												PLXNB3	Discordant	PLXNB3	1
ENSG00000183837														PNMA3	Variable												PNMA3	Discordant	PNMA3	1
ENSG00000198883														PNMA5	Variable												PNMA5	S	PNMA5	1
ENSG00000235961														PNMA6C	Unknown												PNMA6A	S	PNMA6A	0
ENSG00000268883																													PNMA6B	0
ENSG00000006757									PNPLA4		Upregulated	#N/A	Monoallelic	PNPLA4	Escape								PNPLA4	0.624624			PNPLA4	E	PNPLA4	1
ENSG00000124429														POF1B	Variable												POF1B	VE	POF1B	1
ENSG00000101868														POLA1	Inactive												POLA1	S	POLA1	1
ENSG00000049769									PPP1R3F		Downregulated	#N/A	Monoallelic	PPP1R3F	Inactive												PPP1R3F	S	PPP1R3F	0
ENSG00000102103														PQBP1	Variable												PQBP1	Mostly S	PQBP1	1
ENSG00000123131														PRDX4	Inactive												PRDX4	S	PRDX4	0
ENSG00000183943														PRKX	Escape	PRKX	PRKX	escape	bi-allelic	0			PRKX	0.514565			PRKX	E	PRKX	1
ENSG00000147224														PRPS1	Inactive	PRPS1	PRPS1	inactive	mono-allelic	mono-allelic							PRPS1	S	PRPS1	0
ENSG00000101911														PRPS2	Inactive	PRPS2	PRPS2	inactive	bi-allelic	0							PRPS2	S	PRPS2	1
ENSG00000130962														PRRG1	Inactive	PRRG1	PRRG1	inactive	0	0							PRRG1	Mostly S	PRRG1	0
ENSG00000165186														PTCHD1	Variable												PTCHD1	Discordant	PTCHD1	1
ENSG00000155961									RAB39B		Upregulated	#N/A	Monoallelic	RAB39B	Inactive												RAB39B	S	RAB39B	1
ENSG00000172476														RAB40A	Inactive												RAB40A	Discordant	RAB40A	1
ENSG00000123595														RAB9A	Escape												RAB9A	Mostly E	RAB9A	1
ENSG00000123570														RAB9B	Inactive												RAB9B	Mostly S	RAB9B	0
ENSG00000131831														RAI2	Inactive												RAI2	S	RAI2	0
ENSG00000102054														RBBP7	Variable	RBBP7	RBBP7	variable	0	0							RBBP7	Mostly E	RBBP7	1
ENSG00000182872														RBM10	Inactive	RBM10	RBM10	inactive	0	0							RBM10	S	RBM10	1
ENSG00000102317									RBM3		Upregulated	#N/A	Monoallelic	RBM3	Variable	RBM3	RBM3	variable	mono-allelic	mono-allelic							RBM3	S	RBM3	1
ENSG00000089682														RBM41	Inactive	RBM41	RBM41	inactive	0	0							RBM41	Mostly S	RBM41	1
ENSG00000134597														RBMX2	Inactive												RBMX2	S	RBMX2	1
ENSG00000102032														RENBP	Escape												RENBP	Discordant	RENBP	1
ENSG00000169891														REPS2	Inactive												REPS2	Discordant	REPS2	0
ENSG00000243978														RGAG1	Variable														RGAG1	1
ENSG00000242732									RTL5		Upregulated	#N/A	Monoallelic	RGAG4	Inactive	RGAG4	RGAG4	inactive	0	0									RGAG4	0
ENSG00000130988														RGN	Inactive												RGN	S	RGN	0
ENSG00000101883														RHOXF1	Unknown												RHOXF1	No call	RHOXF1	1
ENSG00000258545																													RHOXF1-AS1	0
ENSG00000234493														GS1-421I3.2	Unknown														RHOXF1P1	0
ENSG00000158423														RIBC1	Escape												RIBC1	Discordant	RIBC1	1
ENSG00000264573																													RN7SL15P	0
ENSG00000125352																											RNF113A	S	RNF113A	1
ENSG00000212663																													RP1-122K4.3	0
ENSG00000231217																													RP11-1M18.1	0
ENSG00000227329																													RP11-258C19.4	0
ENSG00000242021																													RP11-268G12.3	0
ENSG00000234062																													RP11-308D16.2	0
ENSG00000237531																													RP11-309M23.1	0
ENSG00000236393														RP11-320G24.1	Unknown														RP11-320G24.1	0
ENSG00000229491																													RP11-342D14.1	0
ENSG00000183171																													RP11-49C9.2	0
ENSG00000260081																													RP11-66N11.8	0
ENSG00000205664														RP11-706O15.1	Escape								RP11-706O15.1	0.74833					RP11-706O15.1	1
ENSG00000234449														RP11-706O15.3	Unknown														RP11-706O15.3	0
ENSG00000205663														RP11-706O15.5	Unknown														RP11-706O15.5	0
ENSG00000205662														RP11-706O15.7	Unknown														RP11-706O15.7	0
ENSG00000236120														RP11-733O18.1	Unknown														RP11-733O18.1	0
ENSG00000228906														RP13-216E22.4	Unknown								RP13-216E22.4	1.4554					RP13-216E22.4	1
ENSG00000271199																													RP13-216E22.5	0
ENSG00000225008																													RP13-228J13.6	0
ENSG00000228986																													RP13-228J13.8	0
ENSG00000223511														RP13-297E16.4	Unknown														RP13-297E16.4	0
ENSG00000234969																													RP13-33H18.1	0
ENSG00000281849																													RP13-465B17.4	0
ENSG00000280767																													RP13-465B17.5	0
ENSG00000271533																													RP3-368A4.6	0
ENSG00000223714																													RP5-1172N10.2	0
ENSG00000274536																													RP6-159A1.4	0
ENSG00000236064																													RP6-191P20.4	0
ENSG00000237863																													RP6-24A23.3	0
ENSG00000261409																													RP6-24A23.7	0
ENSG00000280322																													RP6-24A23.8	0
ENSG00000156313														RPGR	Inactive	RPGR	RPGR	inactive	0	0							RPGR	S	RPGR	0
ENSG00000147403														RPL10	Inactive												RPL10	S	RPL10	1
ENSG00000198918														RPL39	Inactive												RPL39	S	RPL39	0
ENSG00000198034														RPS4X	Escape	RPS4X	RPS4X	escape	bi-allelic	mono-allelic			RPS4X	0.534015			RPS4X	Mostly E	RPS4X	1
ENSG00000214018																													RRM2P3	0
ENSG00000181433														SAGE1	Unknown												SAGE1	No call	SAGE1	0
ENSG00000047634														SCML1	Inactive												SCML1	S	SCML1	0
ENSG00000230146																													SEPHS1P4	0
ENSG00000125354														SEPT6	Inactive								SEPT6	0.428407					SEPT6	1
ENSG00000185960														SHOX	Escape												SHOX	PAR	SHOX	1
ENSG00000146950														SHROOM2	Variable	SHROOM2	SHROOM2	variable	bi-allelic	0							SHROOM2	Mostly VE	SHROOM2	1
ENSG00000126903														SLC10A3	Inactive												SLC10A3	S	SLC10A3	0
ENSG00000147100														SLC16A2	Inactive												SLC16A2	Mostly S	SLC16A2	0
ENSG00000102078														SLC25A14	Inactive												SLC25A14	S	SLC25A14	0
ENSG00000005022														SLC25A5	Inactive	SLC25A5	SLC25A5	inactive	0	0							SLC25A5	S	SLC25A5	1
ENSG00000224281																											SLC25A5-AS1	No call	SLC25A5-AS1	0
ENSG00000130821									SLC6A8		Upregulated	#N/A	Monoallelic	SLC6A8	Unknown	SLC6A8	SLC6A8	unknown	0	mono-allelic							SLC6A8	No call	SLC6A8	1
ENSG00000165349														SLC7A3	Unknown	SLC7A3	SLC7A3	unknown	0	0							SLC7A3	Mostly S	SLC7A3	0
ENSG00000065923														SLC9A7	Inactive	SLC9A7	SLC9A7	inactive	0	mono-allelic							SLC9A7	S	SLC9A7	0
ENSG00000179542														SLITRK4	Unknown												SLITRK4	S	SLITRK4	0
ENSG00000072501														SMC1A	Escape								SMC1A	0.298006			SMC1A	Mostly E	SMC1A	1
ENSG00000178947														LINC00086	Unknown														SMIM10L2A	0
ENSG00000091482														SMPX	Inactive												SMPX	S	SMPX	0
ENSG00000102172														SMS	Inactive	SMS	SMS	inactive	mono-allelic	0							SMS	S	SMS	0
ENSG00000207165																											SNORA70	No call	SNORA70	0
ENSG00000147164														SNX12	Inactive	SNX12	SNX12	inactive	mono-allelic	mono-allelic							SNX12	S	SNX12	1
ENSG00000147059														SPIN2A	Inactive												SPIN2A	S	SPIN2A	0
ENSG00000186787														SPIN2B	Unknown												SPIN2B	Mostly S	SPIN2B	0
ENSG00000184343														SRPK3	Variable												SRPK3	S	SRPK3	1
ENSG00000102359														SRPX2	Variable												SRPX2	VE	SRPX2	1
ENSG00000180879														SSR4	Inactive	SSR4	SSR4	inactive	0	mono-allelic							SSR4	S	SSR4	1
ENSG00000134602														MST4	Inactive	MST4	MST4	inactive	mono-allelic	mono-allelic									STK26	0
ENSG00000101945														SUV39H1	Inactive												SUV39H1	S	SUV39H1	1
ENSG00000008056														SYN1	Inactive	SYN1	SYN1	inactive	0	0							SYN1	Mostly S	SYN1	1
ENSG00000102003														SYP	Inactive												SYP	S	SYP	1
ENSG00000102362														SYTL4	Escape												SYTL4	Mostly S	SYTL4	1
ENSG00000147041														SYTL5	Inactive												SYTL5	S	SYTL5	0
ENSG00000147133														TAF1	Inactive												TAF1	S	TAF1	0
ENSG00000187325														TAF9B	Unknown	TAF9B	TAF9B	unknown	mono-allelic	mono-allelic							TAF9B	S	TAF9B	1
ENSG00000102125														TAZ	Inactive												TAZ	S	TAZ	1
ENSG00000068354														TBC1D25	Inactive												TBC1D25	S	TBC1D25	1
ENSG00000133138														TBC1D8B	Inactive												TBC1D8B	S	TBC1D8B	0
ENSG00000101849														TBL1X	Variable	TBL1X	TBL1X	variable	bi-allelic	0							TBL1X	Discordant	TBL1X	1
ENSG00000122145														TBX22	Unknown												TBX22	S	TBX22	0
ENSG00000172465																											TCEAL1	S	TCEAL1	0
ENSG00000196507														TCEAL3	Unknown	TCEAL3	TCEAL3	unknown	mono-allelic	0							TCEAL3	No call	TCEAL3	0
ENSG00000182916														TCEAL7	Inactive	TCEAL7	TCEAL7	inactive	bi-allelic	0							TCEAL7	S	TCEAL7	0
ENSG00000180964														TCEAL8	Unknown	TCEAL8	TCEAL8	unknown	0	0							TCEAL8	S	TCEAL8	0
ENSG00000185222														WBP5	Variable														TCEAL9	1
ENSG00000176896														TCEANC	Escape												TCEANC	Mostly E	TCEANC	1
ENSG00000009694														TENM1	Inactive														TENM1	1
ENSG00000068323														TFE3	Inactive	TFE3	TFE3	inactive	0	0							TFE3	Mostly S	TFE3	1
ENSG00000125676														THOC2	Inactive												THOC2	S	THOC2	0
ENSG00000126768														TIMM17B	Inactive	TIMM17B	TIMM17B	inactive	0	0							TIMM17B	Mostly S	TIMM17B	0
ENSG00000102265														TIMP1	Variable												TIMP1	VE	TIMP1	1
ENSG00000157600														TMEM164	Inactive												TMEM164	S	TMEM164	1
ENSG00000177854														TMEM187	Inactive												TMEM187	Mostly VE	TMEM187	1
ENSG00000125355														TMEM255A	Inactive														TMEM255A	0
ENSG00000147003														TMEM27	Escape														TMEM27	1
ENSG00000179363																											TMEM31	No call	TMEM31	0
ENSG00000147027														TMEM47	Unknown	TMEM47	TMEM47	unknown	0	0							TMEM47	S	TMEM47	0
ENSG00000185973														TMLHE	Inactive												TMLHE	S	TMLHE	0
ENSG00000158164									TMSB15A		Upregulated	#N/A	Monoallelic	TMSB15A	Inactive												TMSB15A	S	TMSB15A	1
ENSG00000205542														TMSB4X	Unknown	TMSB4X	TMSB4X	unknown	0	0							TMSB4X	No call	TMSB4X	1
ENSG00000000005														TNMD	Unknown												TNMD	No call	TNMD	0
ENSG00000235447																													TRAPPC13P1	0
ENSG00000196459														TRAPPC2	Escape	TRAPPC2	TRAPPC2	escape	bi-allelic	0							TRAPPC2	Mostly E	TRAPPC2	1
ENSG00000183479														TREX2	Inactive												TREX2	S	TREX2	1
ENSG00000188917														TRMT2B	Inactive												TRMT2B	S	TRMT2B	1
ENSG00000067445														TRO	Inactive												TRO	Mostly S	TRO	0
ENSG00000157514									TSC22D3		Upregulated	#N/A	Monoallelic	TSC22D3	Inactive												TSC22D3	Mostly S	TSC22D3	1
ENSG00000270641																TSIX	TSIX	unknown	0	mono-allelic							TSIX	VE	TSIX	1
ENSG00000000003														TSPAN6	Variable	TSPAN6	TSPAN6	variable	bi-allelic	0							TSPAN6	Mostly S	TSPAN6	1
ENSG00000215105																											TTC3P1	No call	TTC3P1	0
ENSG00000086712														TXLNG	Escape	TXLNG	TXLNG	escape	0	bi-allelic			TXLNG	0.337279			TXLNG	E	TXLNG	1
ENSG00000214897																													U82695.5	0
ENSG00000130985									UBA1		Upregulated	Biallelic	#N/A	UBA1	Escape								UBA1	0.168532			UBA1	E	UBA1	1
ENSG00000077721														UBE2A	Inactive												UBE2A	S	UBE2A	1
ENSG00000188021														UBQLN2	Inactive												UBQLN2	S	UBQLN2	0
ENSG00000094841														UPRT	Inactive												UPRT	Mostly S	UPRT	0
ENSG00000102226														USP11	Inactive												USP11	Discordant	USP11	1
ENSG00000124486														USP9X	Escape	USP9X	USP9X	escape	0	0			USP9X	0.214901			USP9X	Mostly E	USP9X	1
ENSG00000156697														UTP14A	Inactive												UTP14A	Mostly S	UTP14A	1
ENSG00000126756														UXT	Inactive												UXT	S	UXT	1
ENSG00000124333														VAMP7	Inactive	VAMP7	VAMP7	PAR	0	0							VAMP7	S	VAMP7	0
ENSG00000155959														VBP1	Inactive	VBP1	VBP1	inactive	0	0							VBP1	S	VBP1	1
ENSG00000169059																											VCX3A	No call	VCX3A	0
ENSG00000205642																											VCX3B	No call	VCX3B	0
ENSG00000165197														FIGF	Inactive	FIGF	FIGF	#N/A	#N/A	#N/A									VEGFD	0
ENSG00000160131														VMA21	Inactive												VMA21	S	VMA21	0
ENSG00000182484																											WASH6P	No call	WASH6P	0
ENSG00000101940														WDR13	Inactive												WDR13	S	WDR13	0
ENSG00000196998														WDR45	Inactive												WDR45	S	WDR45	0
ENSG00000196632														WNK3	Inactive												WNK3	S	WNK3	0
ENSG00000155622																											XAGE2	No call	XAGE2	0
ENSG00000124343														XG	Escape												XG	PAR	XG	1
ENSG00000101966														XIAP	Inactive												XIAP	S	XIAP	1
ENSG00000047597														XK	Variable												XK	S	XK	1
ENSG00000122121														XPNPEP2	Inactive												XPNPEP2	Discordant	XPNPEP2	0
ENSG00000181704														YIPF6	Inactive	YIPF6	YIPF6	inactive	mono-allelic	0							YIPF6	S	YIPF6	0
ENSG00000177485														ZBTB33	Inactive	ZBTB33	ZBTB33	inactive	0	0							ZBTB33	S	ZBTB33	1
ENSG00000102053														ZC3H12B	Inactive												ZC3H12B	Discordant	ZC3H12B	0
ENSG00000126970														ZC4H2	Inactive												ZC4H2	S	ZC4H2	1
ENSG00000174460									ZCCHC12		Upregulated	#N/A	Monoallelic	ZCCHC12	Unknown												ZCCHC12	S	ZCCHC12	1
ENSG00000166707														ZCCHC18	Inactive												ZCCHC18	Mostly S	ZCCHC18	0
ENSG00000179300														ZCCHC5	Unknown														ZCCHC5	0
ENSG00000102383														ZDHHC15	Inactive												ZDHHC15	S	ZDHHC15	0
ENSG00000188706														ZDHHC9	Inactive												ZDHHC9	S	ZDHHC9	0
ENSG00000189420														ZFP92	Unknown												ZFP92	No call	ZFP92	0
ENSG00000166432														ZMAT1	Variable												ZMAT1	Mostly S	ZMAT1	1
ENSG00000147130														ZMYM3	Inactive	ZMYM3	ZMYM3	inactive	0	mono-allelic							ZMYM3	S	ZMYM3	0
ENSG00000147117														ZNF157	Variable												ZNF157	Discordant	ZNF157	1
ENSG00000147118														ZNF182	Inactive												ZNF182	S	ZNF182	0
ENSG00000063587														ZNF275	Inactive	ZNF275	ZNF275	inactive	0	0							ZNF275	S	ZNF275	1
ENSG00000056277														ZNF280C	Variable												ZNF280C	Mostly S	ZNF280C	1
ENSG00000147124														ZNF41	Inactive												ZNF41	S	ZNF41	0
ENSG00000173275														ZNF449	Inactive												ZNF449	S	ZNF449	0
ENSG00000147180														ZNF711	Variable												ZNF711	Discordant	ZNF711	1
ENSG00000186376														ZNF75D	Inactive												ZNF75D	S	ZNF75D	0
ENSG00000169249									ZRSR2		Upregulated	Biallelic	#N/A	ZRSR2	Escape	ZRSR2	ZRSR2	escape	bi-allelic	0			ZRSR2	0.46933			ZRSR2	E	ZRSR2	1
ENSG00000198455														ZXDB	Unknown												ZXDB	S	ZXDB	0
ENSG00000276861																											5S_rRNA	No call
ENSG00000271394																											7SK	No call
ENSG00000101986														ABCD1	Inactive												ABCD1	Mostly S
ENSG00000123165																											ACTRT1	No call
ENSG00000180772														AGTR2	Inactive												AGTR2	S
ENSG00000186471														AKAP14	Variable												AKAP14	Mostly S
ENSG00000147081																											AKAP4	S
ENSG00000125363																											AMELX	No call
ENSG00000184675														AMER1	Inactive												AMER1	S
ENSG00000155008														APOOL	Inactive												APOOL	Mostly S
ENSG00000078061														ARAF	Inactive												ARAF	S
ENSG00000147256														ARHGAP36	Inactive												ARHGAP36	No call
ENSG00000131089														ARHGEF9	Inactive												ARHGEF9	S
ENSG00000174225																											ARL13A	S
ENSG00000126947														ARMCX1	Inactive	ARMCX1	ARMCX1	inactive	0	bi-allelic							ARMCX1	S
ENSG00000125962														ARMCX5	Unknown												ARMCX5	S
ENSG00000271147																											ARMCX5-GPRASP2	S
ENSG00000286237																											ARMCX5-GPRASP2	S
ENSG00000120500														ARR3	Inactive												ARR3	S
ENSG00000004848														ARX	Unknown												ARX	No call
ENSG00000165192														ASB11	Variable												ASB11	VE
ENSG00000102048														ASB9	Inactive												ASB9	S
ENSG00000101892														ATP1B4	Inactive												ATP1B4	No call
ENSG00000067842														ATP2B3	Inactive												ATP2B3	Discordant
ENSG00000085224									ATRX		Downregulated	#N/A	Monoallelic	ATRX	Inactive	ATRX	ATRX	inactive	0	mono-allelic							ATRX	S
ENSG00000123594																											ATXN3L	No call
ENSG00000204195														AWAT1	Inactive												AWAT1	S
ENSG00000147160														AWAT2	Unknown												AWAT2	No call
ENSG00000236824																											BCYRN1	No call
ENSG00000133169									BEX1		Upregulated	#N/A	Monoallelic	BEX1	Unknown												BEX1	S
ENSG00000133134														BEX2	Inactive	BEX2	BEX2	inactive	bi-allelic	0							BEX2	S
ENSG00000198908														BHLHB9	Inactive	BHLHB9	BHLHB9	inactive	bi-allelic	0							BHLHB9	S
ENSG00000130385																											BMP15	No call
ENSG00000102239																											BRS3	VE
ENSG00000165288									BRWD3		Downregulated	#N/A	Monoallelic	BRWD3	Inactive												BRWD3	S
ENSG00000010671									BTK		Downregulated	#N/A	Monoallelic	BTK	Inactive												BTK	S
ENSG00000288368																C1GALT1C1	C1GALT1C1	inactive	0	0							C1GALT1C1	S
ENSG00000102245														CD40LG	Variable												CD40LG	VE
ENSG00000288642																											CDR1	S
ENSG00000131264														CDX4	Unknown												CDX4	No call
ENSG00000223591																											CENPVL1	No call
ENSG00000147400														CETN2	Inactive												CETN2	S
ENSG00000126759														CFP	Inactive												CFP	S
ENSG00000171365									CLCN5		Downregulated	#N/A	Monoallelic	CLCN5	Inactive												CLCN5	S
ENSG00000165376														CLDN2	Inactive												CLDN2	S
ENSG00000183862																											CNGA2	No call
ENSG00000147183																											CPXCR1	No call
ENSG00000268902																											CSAG2	No call
ENSG00000268916																											CSAG3	No call
ENSG00000268940																											CT45A1	No call
ENSG00000271449																											CT45A2	No call
ENSG00000269096																											CT45A3	No call
ENSG00000228836																											CT45A5	No call
ENSG00000278289																											CT45A6	No call
ENSG00000236371																											CT47A1	No call
ENSG00000288363																											CT47A1	No call
ENSG00000226929																											CT47A11	No call
ENSG00000226023																											CT47A6	No call
ENSG00000288273																											CT47A6	No call
ENSG00000228517																											CT47A7	No call
ENSG00000236446																											CT47B1	No call
ENSG00000288466																											CT47B1	No call
ENSG00000268651																											CTAG1A	No call
ENSG00000126890														CTAG2	Unknown												CTAG2	No call
ENSG00000215115																											CXorf49	No call
ENSG00000235699																											CXorf51B	No call
ENSG00000165182																											CXorf58	S
ENSG00000203933																											CXorf66	S
ENSG00000187893																											CXXC1P1	No call
ENSG00000165168														CYBB	Inactive												CYBB	S
ENSG00000183035																											CYLC1	No call
ENSG00000226372																											DCAF8L1	No call
ENSG00000189186																											DCAF8L2	No call
ENSG00000077279														DCX	Inactive												DCX	S
ENSG00000184735																											DDX53	No call
ENSG00000184210														DGAT2L6	Variable												DGAT2L6	VE
ENSG00000130826														DKC1	Inactive												DKC1	S
ENSG00000269502																											DMRTC1	No call
ENSG00000184911														DMRTC1B	Unknown												DMRTC1B	No call
ENSG00000189037																											DUSP21	No call
ENSG00000130829														DUSP9	Inactive												DUSP9	S
ENSG00000147155									EBP		Downregulated	#N/A	Monoallelic	EBP	Unknown												EBP	Mostly S
ENSG00000102034														ELF4	Inactive	ELF4	ELF4	inactive	0	0							ELF4	S
ENSG00000102119														EMD	Unknown												EMD	S
ENSG00000165675														ENOX2	Inactive												ENOX2	Mostly S
ENSG00000187682														ERAS	Unknown												ERAS	No call
ENSG00000123576																											ESX1	No call
ENSG00000277150																											F8A3	No call
ENSG00000101981														F9	Variable												F9	No call
ENSG00000182518														FAM104B	Inactive												FAM104B	S
ENSG00000268350																FAM156A	FAM156A	inactive	0	0							FAM156A	S
ENSG00000179304														FAM156B	Unknown	FAM156B	FAM156B	unknown	bi-allelic	0							FAM156B	No call
ENSG00000071889														FAM3A	Inactive	FAM3A	FAM3A	inactive	0	0							FAM3A	S
ENSG00000185448																											FAM47A	No call
ENSG00000189132																											FAM47B	No call
ENSG00000198173																											FAM47C	No call
ENSG00000183304																											FAM9A	No call
ENSG00000177138														FAM9B	Variable												FAM9B	No call
ENSG00000147378														FATE1	Unknown												FATE1	No call
ENSG00000268066																											FMR1-AS1	No call
ENSG00000176988																											FMR1NB	No call
ENSG00000189299																											FOXR2	No call
ENSG00000227942																											FRMD8P1	No call
ENSG00000169933														FRMPD4	Inactive												FRMPD4	Discordant
ENSG00000132446																											FTHL17	No call
ENSG00000160219														GAB3	Inactive												GAB3	Mostly S
ENSG00000205777																											GAGE1	No call
ENSG00000215274														GAGE10	Unknown												GAGE10	No call
ENSG00000236737																											GAGE12B	No call
ENSG00000227488																											GAGE12D	No call
ENSG00000216649																											GAGE12E	No call
ENSG00000236362																											GAGE12F	No call
ENSG00000224659																											GAGE12J	No call
ENSG00000274274																											GAGE13	No call
ENSG00000189064																											GAGE2A	No call
ENSG00000275113																											GAGE2E	No call
ENSG00000102145														GATA1	Inactive												GATA1	S
ENSG00000102393														GLA	Inactive												GLA	S
ENSG00000101958														GLRA2	Inactive												GLRA2	Mostly S
ENSG00000188828														GLRA4	Variable												GLRA4	VE
ENSG00000288118																GLUD2	GLUD2	inactive	0	0							GLUD2	S
ENSG00000076716														GPC4	Inactive	GPC4	GPC4	inactive	0	0							GPC4	Mostly S
ENSG00000147262																											GPR119	No call
ENSG00000147138														GPR174	Variable												GPR174	VE
ENSG00000102195														GPR50	Unknown												GPR50	No call
ENSG00000171657														GPR82	Unknown												GPR82	No call
ENSG00000198932														GPRASP1	Inactive												GPRASP1	S
ENSG00000158301									GPRASP2		Upregulated	#N/A	Monoallelic	GPRASP2	Inactive												GPRASP2	S
ENSG00000004961														HCCS	Inactive												HCCS	S
ENSG00000165259														HDX	Inactive												HDX	S
ENSG00000126945														HNRNPH2	Inactive	HNRNPH2	HNRNPH2	inactive	mono-allelic	0							HNRNPH2	S
ENSG00000102241														HTATSF1	Inactive												HTATSF1	S
ENSG00000147246														HTR2C	Escape												HTR2C	Mostly E
ENSG00000086758														HUWE1	Inactive	HUWE1	HUWE1	inactive	0	0							HUWE1	Mostly S
ENSG00000123496														IL13RA2	Unknown												IL13RA2	No call
ENSG00000169306														IL1RAPL1	Variable												IL1RAPL1	Discordant
ENSG00000281371																											INE2	No call
ENSG00000243468																											INGX	No call
ENSG00000102313														ITIH6	Unknown												ITIH6	No call
ENSG00000250423														KIAA1210	Variable												KIAA1210	VE
ENSG00000090889														KIF4A	Inactive												KIF4A	S
ENSG00000185915														KLHL34	Unknown												KLHL34	No call
ENSG00000175556														LONRF3	Inactive												LONRF3	Mostly S
ENSG00000147145														LPAR4	Inactive												LPAR4	No call
ENSG00000130224														LRCH2	Inactive												LRCH2	Discordant
ENSG00000102021																											LUZP4	No call
ENSG00000198681																											MAGEA1	No call
ENSG00000124260																											MAGEA10	No call
ENSG00000266560																											MAGEA10-MAGEA5	No call
ENSG00000185247																MAGEA11	MAGEA11	unknown	0	mono-allelic							MAGEA11	VE
ENSG00000213401																											MAGEA12	No call
ENSG00000268606																											MAGEA2	No call
ENSG00000221867																											MAGEA3	No call
ENSG00000242520																											MAGEA5	No call
ENSG00000197172																											MAGEA6	No call
ENSG00000156009																											MAGEA8	VE
ENSG00000123584																											MAGEA9	No call
ENSG00000267978																											MAGEA9B	No call
ENSG00000214107																											MAGEB1	No call
ENSG00000177689																											MAGEB10	No call
ENSG00000189023																											MAGEB16	No call
ENSG00000176774																											MAGEB18	No call
ENSG00000099399																											MAGEB2	No call
ENSG00000198798																											MAGEB3	No call
ENSG00000120289																											MAGEB4	No call
ENSG00000176746																											MAGEB6	No call
ENSG00000155495														MAGEC1	Unknown												MAGEC1	No call
ENSG00000046774																											MAGEC2	No call
ENSG00000102316														MAGED2	Inactive	MAGED2	MAGED2	inactive	mono-allelic	mono-allelic							MAGED2	Mostly S
ENSG00000154545																											MAGED4	No call
ENSG00000187243																											MAGED4B	No call
ENSG00000180815														MAP3K15	Variable												MAP3K15	Mostly S
ENSG00000288295																											MCTS1	S
ENSG00000276493																											Metazoa_SRP	No call
ENSG00000207957																											MIR105-1	No call
ENSG00000207818																											MIR105-2	No call
ENSG00000284157																											MIR106A	No call
ENSG00000221533																											MIR1184-1	S
ENSG00000221808																											MIR1256	No call
ENSG00000276158																											MIR1264	No call
ENSG00000221463																											MIR1277	No call
ENSG00000221710																											MIR1298	No call
ENSG00000222532																											MIR1468	No call
ENSG00000207768																											MIR188	No call
ENSG00000283931																											MIR18B	No call
ENSG00000222715																											MIR1911	No call
ENSG00000222321																											MIR1912	No call
ENSG00000284107																											MIR19B2	No call
ENSG00000284043																											MIR20B	No call
ENSG00000252454																											MIR2114	No call
ENSG00000207725																											MIR222	No call
ENSG00000284567																											MIR223	No call
ENSG00000264566																											MIR23C	No call
ENSG00000265176																											MIR3202-1	No call
ENSG00000283694																											MIR3202-2	No call
ENSG00000221081																											MIR320D2	No call
ENSG00000208015																											MIR362	No call
ENSG00000284499																											MIR363	No call
ENSG00000265658																											MIR3690	PAR
ENSG00000199168																											MIR374A	No call
ENSG00000212027																											MIR374B	No call
ENSG00000283534																											MIR374C	No call
ENSG00000283242																											MIR384	No call
ENSG00000265584																											MIR3978	No call
ENSG00000202566																											MIR421	No call
ENSG00000284231																											MIR424	No call
ENSG00000283622																											MIR4328	No call
ENSG00000283775																											MIR4329	No call
ENSG00000265789																											MIR4330	No call
ENSG00000199001																											MIR448	No call
ENSG00000199132																											MIR450A1	No call
ENSG00000207755																											MIR450A2	No call
ENSG00000216001																											MIR450B	No call
ENSG00000283751																											MIR452	No call
ENSG00000283334																											MIR4536-1	No call
ENSG00000264268																											MIR4767	No call
ENSG00000265465																											MIR4768	No call
ENSG00000263858																											MIR4769	No call
ENSG00000265284																											MIR4770	No call
ENSG00000207785																											MIR500A	No call
ENSG00000239057																											MIR500B	No call
ENSG00000211538																											MIR501	No call
ENSG00000272080																											MIR502	No call
ENSG00000208005																											MIR503	No call
ENSG00000207800																											MIR504	No call
ENSG00000207633																											MIR505	No call
ENSG00000207731																											MIR506	No call
ENSG00000207969																											MIR507	No call
ENSG00000207589																											MIR508	No call
ENSG00000208000																											MIR509-1	No call
ENSG00000207641																											MIR510	No call
ENSG00000207868																											MIR514A1	No call
ENSG00000207866																											MIR514A2	No call
ENSG00000252583																											MIR514B	No call
ENSG00000207758																											MIR532	No call
ENSG00000207784																											MIR542	No call
ENSG00000207820																											MIR545	No call
ENSG00000207628																											MIR651	No call
ENSG00000207970																											MIR660	No call
ENSG00000211991																											MIR676	No call
ENSG00000284286																											MIR718	S
ENSG00000212100																											MIR764	No call
ENSG00000211578																											MIR766	No call
ENSG00000211583																											MIR767	No call
ENSG00000216005																											MIR888	No call
ENSG00000216075																											MIR890	No call
ENSG00000216056																											MIR891A	No call
ENSG00000216064																											MIR891B	No call
ENSG00000215943																											MIR892A	No call
ENSG00000216098																											MIR892B	No call
ENSG00000284538																											MIR92A2	No call
ENSG00000216060																											MIR934	No call
ENSG00000271886																											MIR98	No call
ENSG00000208012																MIRLET7F2	MIRLET7F2	unknown	0	0							MIRLET7F2	No call
ENSG00000169446														MMGT1	Inactive	MMGT1	MMGT1	inactive	bi-allelic	0							MMGT1	S
ENSG00000130150														MOSPD2	Inactive	MOSPD2	MOSPD2	inactive	0	0							MOSPD2	S
ENSG00000214827														MTCP1	Inactive												MTCP1	S
ENSG00000063601														MTMR1	Inactive	MTMR1	MTMR1	inactive	0	mono-allelic							MTMR1	S
ENSG00000102043														MTMR8	Inactive												MTMR8	S
ENSG00000256045																											MTRNR2L10	No call
ENSG00000124479														NDP	Variable												NDP	No call
ENSG00000125356														NDUFA1	Inactive												NDUFA1	S
ENSG00000147123														NDUFB11	Inactive												NDUFB11	S
ENSG00000101882														NKAP	Inactive												NKAP	Mostly S
ENSG00000233382																											NKAPP1	Mostly S
ENSG00000269405																											NXF2	No call
ENSG00000269437																											NXF2B	No call
ENSG00000196970																											NXF4	No call
ENSG00000126952																											NXF5	E
ENSG00000188937																											NYX	S
ENSG00000122126														OCRL	Inactive	OCRL	OCRL	inactive	bi-allelic	0							OCRL	S
ENSG00000147162														OGT	Inactive	OGT	OGT	inactive	0	mono-allelic							OGT	Mostly S
ENSG00000102076																											OPN1LW	No call
ENSG00000268221																											OPN1MW	No call
ENSG00000171054																											OR13H1	No call
ENSG00000189401																											OTUD6A	No call
ENSG00000186912														P2RY4	Inactive												P2RY4	S
ENSG00000184388														PABPC1L2B	Unknown												PABPC1L2B	No call
ENSG00000068985																											PAGE1	No call
ENSG00000234068																											PAGE2	No call
ENSG00000238269														PAGE2B	Unknown												PAGE2B	No call
ENSG00000204279																											PAGE3	No call
ENSG00000158639																											PAGE5	No call
ENSG00000077264														PAK3	Inactive												PAK3	Mostly S
ENSG00000166049																											PASD1	No call
ENSG00000102390														PBDC1	Inactive												PBDC1	S
ENSG00000165194														PCDH19	Escape												PCDH19	S
ENSG00000226784														PGAM4	Unknown												PGAM4	No call
ENSG00000156531														PHF6	Inactive	PHF6	PHF6	inactive	0	0							PHF6	S
ENSG00000165195									PIGA		Upregulated	#N/A	Monoallelic	PIGA	Inactive												PIGA	S
ENSG00000102096									PIM2		Upregulated	#N/A	Monoallelic	PIM2	Inactive												PIM2	S
ENSG00000170965														PLAC1	Variable												PLAC1	VE
ENSG00000123560														PLP1	Inactive												PLP1	Mostly S
ENSG00000102312														PORCN	Inactive												PORCN	Mostly S
ENSG00000196767														POU3F4	Unknown												POU3F4	S
ENSG00000086717														PPEF1	Variable												PPEF1	VE
ENSG00000273850																											PPP2R3B	PAR
ENSG00000276438																											PPP2R3B	PAR
ENSG00000243279														PRAF2	Inactive												PRAF2	S
ENSG00000134594														RAB33A	Inactive												RAB33A	S
ENSG00000102128																											RAB40AL	No call
ENSG00000147127														RAB41	Inactive												RAB41	S
ENSG00000123728														RAP2C	Inactive												RAP2C	S
ENSG00000147274														RBMX	Inactive	RBMX	RBMX	inactive	mono-allelic	0							RBMX	S
ENSG00000175718																											RBMXL3	No call
ENSG00000131721																											RHOXF2	S
ENSG00000203989																											RHOXF2B	No call
ENSG00000147223																											RIPPLY1	S
ENSG00000131263														RLIM	Inactive	RLIM	RLIM	inactive	mono-allelic	0							RLIM	S
ENSG00000133135														RNF128	Unknown												RNF128	S
ENSG00000102218														RP2	Inactive												RP2	S
ENSG00000204086														RPA4	Unknown												RPA4	No call
ENSG00000241343														RPL36A	Inactive												RPL36A	S
ENSG00000257529																											RPL36A-HNRNPH2	S
ENSG00000163682																											RPL9	No call
ENSG00000196933																											RPS26P11	No call
ENSG00000177189									RPS6KA3		Downregulated	#N/A	Monoallelic	RPS6KA3	Inactive	RPS6KA3	RPS6KA3	inactive	0	0							RPS6KA3	S
ENSG00000083750														RRAGB	Inactive												RRAGB	Mostly S
ENSG00000102104														RS1	Inactive												RS1	Discordant
ENSG00000169906																											S100G	E
ENSG00000122122														SASH3	Inactive												SASH3	S
ENSG00000184788														SATL1	Inactive												SATL1	S
ENSG00000251869																SCARNA23	SCARNA23	unknown	mono-allelic	mono-allelic							SCARNA23	No call
ENSG00000123561														SERPINA7	Unknown												SERPINA7	No call
ENSG00000183918														SH2D1A	Variable												SH2D1A	VE
ENSG00000131171														SH3BGRL	Variable	SH3BGRL	SH3BGRL	variable	bi-allelic	0							SH3BGRL	Mostly S
ENSG00000158352									SHROOM4		Downregulated	#N/A	Monoallelic	SHROOM4	Inactive												SHROOM4	Mostly S
ENSG00000077713														SLC25A43	Inactive	SLC25A43	SLC25A43	inactive	0	0							SLC25A43	Mostly S
ENSG00000102100														SLC35A2	Inactive	SLC35A2	SLC35A2	inactive	0	0							SLC35A2	S
ENSG00000017483														SLC38A5	Inactive	SLC38A5	SLC38A5	inactive	0	0							SLC38A5	S
ENSG00000268104																											SLC6A14	No call
ENSG00000198689														SLC9A6	Inactive	SLC9A6	SLC9A6	inactive	0	mono-allelic							SLC9A6	S
ENSG00000185985														SLITRK2	Inactive												SLITRK2	Mostly S
ENSG00000102038														SMARCA1	Inactive												SMARCA1	Mostly S
ENSG00000221716																SNORA11	SNORA11	unknown	mono-allelic	0							SNORA11	No call
ENSG00000221459																											SNORA11C	No call
ENSG00000221475																											SNORA11D	No call
ENSG00000221705																											SNORA11E	No call
ENSG00000208839																											SNORA35	No call
ENSG00000206948																											SNORA36A	No call
ENSG00000206693																SNORA56	SNORA56	unknown	0	0							SNORA56	No call
ENSG00000206622																											SNORA69	No call
ENSG00000200237																											SNORA70	No call
ENSG00000201376																											SNORA70	No call
ENSG00000201945																											SNORA70	No call
ENSG00000202379																											SNORA70	No call
ENSG00000202389																											SNORA70	No call
ENSG00000206661																											SNORA70	No call
ENSG00000206886																											SNORA70	No call
ENSG00000206958																											SNORA70	No call
ENSG00000207098																											SNORA70	No call
ENSG00000207244																											SNORA70	No call
ENSG00000251796																											SNORA70	No call
ENSG00000251893																											SNORA70	No call
ENSG00000251925																											SNORA70	No call
ENSG00000252014																											SNORA70	No call
ENSG00000252133																											SNORA70	No call
ENSG00000252199																											SNORA70	No call
ENSG00000252258																											SNORA70	No call
ENSG00000252505																											SNORA70	No call
ENSG00000252526																											SNORA70	No call
ENSG00000252657																											SNORA70	No call
ENSG00000252724																											SNORA70	No call
ENSG00000252969																											SNORA70	No call
ENSG00000253027																											SNORA70	No call
ENSG00000253042																											SNORA70	No call
ENSG00000276094																											SNORA70	No call
ENSG00000278010																											SNORA70	No call
ENSG00000285264																											SNORA70	No call
ENSG00000277184																											SNORA9	No call
ENSG00000275662																											SNORD112	No call
ENSG00000206979																SNORD61	SNORD61	unknown	0	mono-allelic							SNORD61	No call
ENSG00000208883																											SNORD96B	No call
ENSG00000187808														SOWAHD	Unknown												SOWAHD	S
ENSG00000134595														SOX3	Unknown												SOX3	S
ENSG00000171489																											SPACA5	Mostly S
ENSG00000198021																											SPANXA1	No call
ENSG00000277215																											SPANXA2-OT1	No call
ENSG00000198573																											SPANXC	No call
ENSG00000203923																											SPANXN1	No call
ENSG00000268988																											SPANXN2	No call
ENSG00000189252																											SPANXN3	No call
ENSG00000189326																											SPANXN4	No call
ENSG00000204363																											SPANXN5	No call
ENSG00000204271														SPIN3	Inactive												SPIN3	Mostly S
ENSG00000186767														SPIN4	Inactive												SPIN4	Mostly S
ENSG00000168939														SPRY3	Inactive												SPRY3	S
ENSG00000232549																											SRD5A1P1	No call
ENSG00000126752														SSX1	Unknown												SSX1	No call
ENSG00000241476																											SSX2	No call
ENSG00000165584																											SSX3	No call
ENSG00000268009																											SSX4	No call
ENSG00000269791																											SSX4B	No call
ENSG00000165583																											SSX5	No call
ENSG00000187754																											SSX7	No call
ENSG00000101972														STAG2	Inactive												STAG2	Mostly S
ENSG00000130052														STARD8	Inactive												STARD8	S
ENSG00000157625														TAB3	Inactive												TAB3	S
ENSG00000102387														TAF7L	Escape												TAF7L	E
ENSG00000277800																											TBX22	S
ENSG00000204065														TCEAL5	Unknown												TCEAL5	No call
ENSG00000204071														TCEAL6	Unknown												TCEAL6	No call
ENSG00000225366																											TDGF1P3	No call
ENSG00000120498														TEX11	Unknown												TEX11	No call
ENSG00000268629																											TEX13A	No call
ENSG00000170925																											TEX13B	No call
ENSG00000278057																											TEX28	No call
ENSG00000183434																											TFDP3	No call
ENSG00000153779																											TGIF2LX	No call
ENSG00000007350														TKTL1	Inactive												TKTL1	Discordant
ENSG00000196664														TLR7	Inactive												TLR7	S
ENSG00000101916														TLR8	Unknown												TLR8	No call
ENSG00000233338																											TLR8-AS1	No call
ENSG00000269556									TMEM185A		Downregulated	#N/A	Monoallelic														TMEM185A	S
ENSG00000269226									TMSB15B		Downregulated	#N/A	Monoallelic														TMSB15B	Mostly S
ENSG00000158427														TMSB15B	Inactive												TMSB15B	Mostly S
ENSG00000072315														TRPC5	Variable												TRPC5	VE
ENSG00000158526														TSR2	Inactive												TSR2	S
ENSG00000273694																											U2	No call
ENSG00000283939																											U4	No call
ENSG00000283262																											U6	No call
ENSG00000251964																											U7	No call
ENSG00000229547																											UBE2DNL	No call
ENSG00000276380																											UBE2NL	No call
ENSG00000125351														UPF3B	Inactive												UPF3B	S
ENSG00000237748																											UQCRBP1	No call
ENSG00000134588																											USP26	No call
ENSG00000273820																											USP27X	No call
ENSG00000182583																											VCX	No call
ENSG00000177504																											VCX2	No call
ENSG00000259849																											VENTXP1	E
ENSG00000102243														VGLL1	Escape												VGLL1	E
ENSG00000101842														VSIG1	Unknown												VSIG1	No call
ENSG00000155659														VSIG4	Variable												VSIG4	No call
ENSG00000015285														WAS	Variable												WAS	VE
ENSG00000131725														WDR44	Inactive												WDR44	S
ENSG00000171402																											XAGE3	No call
ENSG00000171405																											XAGE5	No call
ENSG00000182489														XKRX	Variable												XKRX	S
ENSG00000201868																											Y_RNA	No call
ENSG00000230797																YY2	YY2	unknown	0	0							YY2	S
ENSG00000187969																											ZCCHC13	No call
ENSG00000156925														ZIC3	Unknown												ZIC3	S
ENSG00000221994									ZNF630		Downregulated	#N/A	Monoallelic	ZNF630	Inactive												ZNF630	Mostly S
ENSG00000251192														ZNF674	Inactive												ZNF674	S
ENSG00000197779														ZNF81	Inactive												ZNF81	Mostly S
ENSG00000198205														ZXDA	Unknown												ZXDA	S
ENSG00000173210																							ABLIM3	-0.910724
ENSG00000251660																							AC007036.5	-0.83652
ENSG00000049192																							ADAMTS6	-0.525839
ENSG00000165923																							AGBL2	-0.381068
ENSG00000204310																							AGPAT1	-0.227532
ENSG00000163050																							ADCK3	0.153373
ENSG00000223960																							AC009948.5	0.260919
ENSG00000237815																							AC007000.11	0.625466
ENSG00000253701																							AL928768.3	-0.980124
ENSG00000166126																							AMN	0.518584
ENSG00000213337																							ANKRD39	0.263612
ENSG00000255284																							AP006621.5	0.600952
ENSG00000034053																							APBA2	0.322911
ENSG00000243811																							APOBEC3D	-0.373996
ENSG00000214293																							APTR	-0.653416
ENSG00000196914																							ARHGEF12	-0.459616
ENSG00000133794																							ARNTL	-0.164015
ENSG00000183734																							ASCL2	-0.532761
ENSG00000105409																							ATP1A3	-0.324321
ENSG00000105778																							AVL9	0.114377
ENSG00000253320																							AZIN1-AS1	0.608356
ENSG00000171791																							BCL2	0.268323
ENSG00000153162																							BMP6	-0.615923
ENSG00000151136																							BTBD11	0.310099
ENSG00000100346																							CACNA1I	0.659874
ENSG00000108588																							CCDC47	-0.214044
ENSG00000154240																							CEP112	0.420144
ENSG00000117519																							CNN3	0.662129
ENSG00000261353																							CTA-14H9.5	-0.919916
ENSG00000273243																							CTA-217C2.2	-0.633804
ENSG00000271737																							CTB-113I20.2	1.16006
ENSG00000240808																							CTD-3236F5.1	0.991428
ENSG00000115165																							CYTIP	0.186192
ENSG00000165617																							DACT1	0.859299
ENSG00000066084																							DIP2B	0.134628
ENSG00000166938																							DIS3L	0.158401
ENSG00000158856																							DMTN	-0.500157
ENSG00000116641																							DOCK7	0.339021
ENSG00000154813																							DPH3	-0.255309
ENSG00000013016																							EHD3	-0.443863
ENSG00000075151																							EIF4G3	-0.221636
ENSG00000120533																							ENY2	0.161685
ENSG00000115109																							EPB41L5	0.350693
ENSG00000229153																							EPHA1-AS1	0.808147
ENSG00000072134																							EPN2	-0.301262
ENSG00000124491																							F13A1	-0.691969
ENSG00000122378																							FAM213A	0.301942
ENSG00000126882																							FAM78A	-0.143867
ENSG00000158169																							FANCC	-0.292273
ENSG00000119782																							FKBP1B	-0.608967
ENSG00000136068																							FLNB	0.269412
ENSG00000137312																							FLOT1	0.186194
ENSG00000034713																							GABARAPL2	-0.208322
ENSG00000159921																							GNE	0.174884
ENSG00000120053																							GOT1	-0.380819
ENSG00000203618																							GP1BB	-0.696088
ENSG00000100351																							GRAP2	-0.294312
ENSG00000213366																							GSTM2	0.502262
ENSG00000164116																							GUCY1A3	-0.640003
ENSG00000228223																							HCG11	-0.953706
ENSG00000162639																							HENMT1	-0.259961
ENSG00000103942																							HOMER2	-0.567722
ENSG00000166333																							ILK	-0.237064
ENSG00000132849																							INADL	0.278191
ENSG00000165898																							ISCA2	0.234699
ENSG00000005961																							ITGA2B	-0.950433
ENSG00000259207																							ITGB3	-0.965035
ENSG00000082781																							ITGB5	-0.74455
ENSG00000228382																							ITPKB-IT1	0.586807
ENSG00000166086																							JAM3	-0.662149
ENSG00000134152																							KATNBL1	0.221167
ENSG00000134504																							KCTD1	-0.544072
ENSG00000100441																							KHNYN	0.186099
ENSG00000121210																							KIAA0922	0.153006
ENSG00000087448																							KLHL42	0.199681
ENSG00000172037																							LAMB2	-0.626089
ENSG00000232662																							LDHBP1	0.766488
ENSG00000235532																							LINC00402	0.415349
ENSG00000255571																							LINC00925	-1.07898
ENSG00000253819																							LINC01151	-1.1496
ENSG00000132128																							LRRC41	0.20201
ENSG00000136802																							LRRC8A	-0.218287
ENSG00000049323																							LTBP1	-0.788837
ENSG00000234456																							MAGI2-AS3	-1.33246
ENSG00000166963																							MAP1A	-0.597072
ENSG00000156265																							MAP3K7CL	-0.774121
ENSG00000050393																							MCUR1	-0.322495
ENSG00000154305																							MIA3	-0.0935626
ENSG00000105556																							MIER2	-0.195072
ENSG00000265929																							MIR5195	0.595941
ENSG00000011143																							MKS1	-0.254511
ENSG00000103111																							MON1B	-0.185803
ENSG00000180354																							MTURN	-0.549289
ENSG00000196814																							MVB12B	0.440842
ENSG00000101335																							MYL9	-1.06206
ENSG00000198496																							NBR2	-0.383483
ENSG00000049759																							NEDD4L	-0.652748
ENSG00000136783																							NIPSNAP3A	-0.205567
ENSG00000154146																							NRGN	-0.692107
ENSG00000035681																							NSMAF	0.131195
ENSG00000228960																							OR2A9P	1.23237
ENSG00000228474																							OST4	-0.276231
ENSG00000140479																							PCSK6	-0.698153
ENSG00000162366																							PDZK1IP1	-1.13806
ENSG00000049246																							PER3	-0.618266
ENSG00000197121																							PGAP1	0.49391
ENSG00000131788																							PIAS3	-0.21463
ENSG00000117461																							PIK3R3	-0.49915
ENSG00000205038																							PKHD1L1	-0.791988
ENSG00000144283																							PKP4	-0.258035
ENSG00000054690																							PLEKHH1	0.356058
ENSG00000176903																							PNMA1	-0.231708
ENSG00000067113																							PPAP2A	0.322261
ENSG00000138078																							PREPL	-0.243351
ENSG00000163704																							PRRT3	-0.419667
ENSG00000072135																							PTPN18	-0.252696
ENSG00000172794																							RAB37	-0.275915
ENSG00000152942																							RAD17	-0.161721
ENSG00000204764																							RANBP17	-0.508145
ENSG00000138670																							RASGEF1B	0.582221
ENSG00000265802																							RN7SL49P	1.17603
ENSG00000264352																							RN7SL602P	0.774656
ENSG00000169855																							ROBO1	-0.948319
ENSG00000271840																							RP1-224A6.9	0.627155
ENSG00000280135																							RP1-47M23.3	0.334177
ENSG00000272468																							RP1-86C11.7	-1.18482
ENSG00000266086																							RP11-159D12.5	0.852492
ENSG00000260807																							RP11-161M6.2	0.811232
ENSG00000255089																							RP11-326C3.10	0.953458
ENSG00000260912																							RP11-363E7.4	-0.407755
ENSG00000229625																							RP11-44N12.2	0.296798
ENSG00000259773																							RP11-507J18.2	1.43796
ENSG00000270149																							RP11-544M22.13	-1.80109
ENSG00000260244																							RP11-588K22.2	-0.685074
ENSG00000266865																							RP11-848P1.9	0.843246
ENSG00000265458																							RP13-20L14.6	1.21557
ENSG00000273253																							RP3-402G11.26	0.5154
ENSG00000252712																							SCARNA14	0.51849
ENSG00000138758																							SEPT11	-0.250809
ENSG00000184702																							SEPT5	-0.810131
ENSG00000164300																							SERINC5	0.205989
ENSG00000169247																							SH3TC2	-0.664695
ENSG00000253861																							SLC2A3P1	0.543839
ENSG00000022567																							SLC45A4	-0.295002
ENSG00000139514																							SLC7A1	-0.388935
ENSG00000164038																							SLC9B2	0.25587
ENSG00000145335																							SNCA	-0.469606
ENSG00000206838																							SNORA5A	0.700347
ENSG00000170677																							SOCS6	0.374544
ENSG00000120896																							SORBS3	0.312044
ENSG00000113140																							SPARC	-0.684418
ENSG00000072195																							SPEG	0.472779
ENSG00000115306																							SPTBN1	0.201373
ENSG00000008513																							ST3GAL1	0.120095
ENSG00000136874																							STX17	0.154706
ENSG00000176438																							SYNE3	0.142768
ENSG00000143374																							TARS2	-0.178378
ENSG00000108239																							TBC1D12	-0.53129
ENSG00000179152																							TCAIM	-0.177165
ENSG00000158604																							TMED4	0.135189
ENSG00000139173																							TMEM117	0.467295
ENSG00000128872																							TMOD2	0.209928
ENSG00000170043																							TRAPPC1	-0.34093
ENSG00000255569																							TRAV1-1	0.66776
ENSG00000161911																							TREML1	-0.801094
ENSG00000227191																							TRGC2	-0.632316
ENSG00000109654																							TRIM2	0.781551
ENSG00000125733																							TRIP10	-0.514928
ENSG00000121297																							TSHZ3	-0.588941
ENSG00000168234																							TTC39C	0.176794
ENSG00000100271																							TTLL1	-0.323606
ENSG00000127824																							TUBA4A	-0.207393
ENSG00000130338																							TULP4	-0.138981
ENSG00000175931																							UBE2O	-0.135325
ENSG00000130939																							UBE4B	-0.15239
ENSG00000083290																							ULK2	0.203945
ENSG00000103404																							USP31	-0.263146
ENSG00000035403																							VCL	-0.445774
ENSG00000127831																							VIL1	-0.993474
ENSG00000132612																							VPS4A	0.153673
ENSG00000132471																							WBP2	-0.203898
ENSG00000127580																							WDR24	-0.156554
ENSG00000160193																							WDR4	-0.232763
ENSG00000169180																							XPO6	0.0945838
ENSG00000238933																							Y_RNA	0.738904
ENSG00000149658																							YTHDF1	-0.143194
ENSG00000128245																							YWHAH	-0.276011
ENSG00000157077																							ZFYVE9	0.744263
ENSG00000251247																							ZNF345	0.262148
ENSG00000171295																							ZNF440	0.196576
ENSG00000074657																							ZNF532	0.363028
ENSG00000188785																							ZNF548	0.261352
ENSG00000176083																							ZNF683	-1.06381
ENSG00000196757																							ZNF700	0.216637
ENSG00000197054																							ZNF763	0.494804
ENSG00000165359									INTS6L		Downregulated	#N/A	Monoallelic	DDX26B	Inactive	DDX26B	DDX26B	inactive	bi-allelic	0
ENSG00000235946		X	104062542	104063037					H2BW3P		Downregulated	#N/A	Monoallelic
ENSG00000285756		X	3817528	3937855					BX890604.2		Upregulated	#N/A	Monoallelic
ENSG00000238178		X	16152941	16170869					AC078993.1		Upregulated	#N/A	Monoallelic
ENSG00000196972									SMIM10L2B		Upregulated	#N/A	Monoallelic	LINC00087	Unknown
ENSG00000281566	AL157778.1	X	98450688	98892061	Novel	Upregulated	#N/A	Monoallelic	AL157778.1		Upregulated	#N/A	Monoallelic
ENSG00000228232	GAPDHP1	X	39787132	39788136	Novel	Upregulated	#N/A	Monoallelic
ENSG00000235437	LINC01278	X	63222993	63561095	#N/A	Downregulated	#N/A	Monoallelic
ENSG00000204019																CXorf61	CXorf61	unknown	0	0
																LOC100129520	unknown	#N/A	#N/A	#N/A
																LOC389906	unknown	#N/A	#N/A	#N/A
ENSG00000223749														MIR503HG	Inactive	MIR503HG	MIR503HG	inactive	0	0
ENST00000503018																XGPY2	XGPY2	unknown	0	0
ENSG00000215070																XRCC6P5	XRCC6P5	unknown	mono-allelic	0
ENSG00000269993														AF003625.3	Unknown
ENSG00000238039														AF011889.2	Unknown
ENSG00000184258														CDR1	Inactive
ENSG00000176034														CHDC2	Unknown
ENSG00000165164														CXorf22	Escape
ENSG00000196741														CXorf24	Inactive
ENSG00000205081														CXorf30	Variable
ENSG00000197021														CXorf40B	Inactive
ENSG00000183631														CXorf64	Escape
ENSG00000159123														DMRTC1	Unknown
ENSG00000197932														F8A1	Inactive
ENSG00000156504														FAM122B	Variable
ENSG00000156500														FAM122C	Inactive
ENSG00000134590														FAM127A	Inactive
ENSG00000182646														FAM156A	Inactive
ENSG00000147382														FAM58A	Inactive
ENSG00000147402														GABRQ	Unknown
ENSG00000228543														GS1-519E5.1	Unknown
ENSG00000235385														GS1-600G8.5	Escape
ENSG00000241489														IDS	Unknown
ENSG00000073009														IKBKG	Escape
ENSG00000147121														KRBOX4	Inactive
ENSG00000215162														LINC00269	Unknown
ENSG00000223546														LINC00630	Unknown
ENSG00000239407														LL0XNC01-237H1.2	Unknown
ENSG00000182798														MAGEB17	Unknown
ENSG00000017621														MAGIX	Inactive
ENSG00000185554														NXF2	Unknown
ENSG00000185945														NXF2B	Unknown
ENSG00000080572														PIH1D3	Escape
ENSG00000224201														PNMA6A	Inactive
ENSG00000228532														RP1-241P17.4	Unknown
ENSG00000236751														RP1-30G7.2	Unknown
ENSG00000232611														RP11-1114A5.4	Unknown
ENSG00000234129														RP11-120D5.1	Unknown
ENSG00000229563														RP11-245M24.1	Unknown
ENSG00000270189														RP11-258C19.7	Inactive
ENSG00000235304														RP11-265P11.2	Unknown
ENSG00000235244														RP11-761E20.1	Unknown
ENSG00000227486														RP13-188A5.1	Unknown
ENSG00000272294														RP3-326L13.3	Unknown
ENSG00000203650														RP4-562J12.2	Unknown
ENSG00000231566														RP5-1158E12.3	Unknown
ENSG00000260118														RP6-201G10.2	Unknown
ENSG00000260548														RP6-24A23.6	Unknown
ENSG00000269902														RP6-99M1.3	Unknown
ENSG00000176274														SLC25A53	Inactive
ENSG00000087916														SLC6A14	Inactive
ENSG00000184785														SMIM10	Inactive
ENSG00000155984														TMEM185A	Inactive
ENSG00000221870														TMEM257	Unknown
ENSG00000126950														TMEM35	Inactive
ENSG00000237736														U82670.4	Unknown
ENSG00000259886														U82695.10	Unknown
ENSG00000224963														U82695.9	Unknown
ENSG00000242013														USP27X	Unknown
ENSG00000234390														USP27X-AS1	Inactive
ENSG00000187823														ZCCHC16	Escape
ENSG00000230844														ZNF674-AS1	Inactive
