# Supplementary material for: Pseudoautosomal Region 1 Overdosage Affects the Global Transcriptome in iPSCs From Patients With Klinefelter Syndrome and High-Grade X Chromosome Aneuploidies
Source: Front Cell Dev Biol. 2022 Feb 3;9:801597. doi: 10.3389/fcell.2021.801597 (PMC8850648; doi:10.3389/fcell.2021.801597)
Supplement: Supplementary file 13 [file Table7.xlsx]

## Sheet: Common-DEGs-DE
Table S7: RNA-Seq analysis of the differentiated iPSCs into definitive endoderm. List of the 1777 up and down-regulated DEGs with FDR < 0.05 and LogFC ≥ |0.25| commonly dysregulated in low- and high-grade KS hiPSCs, with a dosage-sensitive pattern of expression. The second sheet (X_Linked_DEGs-DE) lists 76 common DEGs located on the X chromosome and their biallelic Vs monoallelic expression statu…
					47,XXY Vs 46,XY			48-49,KS Vs 46,XY
Gene stable ID	Gene name	Chromosome	Gene start (bp)	Gene end (bp)	LogFC 47,XXY Vs 46,XY	FDR	pvalue	logFC 48-49 KS Vs 46 XY	FDR	pvalue
ENSG00000229807	XIST	X	73820649	73852723	12.7468	0	0	14.2572	0	0
ENSG00000147724	FAM135B	8	138130023	138497261	7.72454	2.44339e-22	5.65901e-24	8.89755	0.00125802	0.000203979
ENSG00000226278	PSPHP1	7	55764797	55773288	8.78469	1.39754e-122	1.68581e-125	8.59826	1.66988e-09	5.1271e-11
ENSG00000169436	COL22A1	8	138588235	138914041	6.07106	7.33346e-05	1.40772e-05	6.78148	2.70294e-06	1.76888e-07
ENSG00000115902	SLC1A4	2	64988477	65023865	2.96149	1.42093e-45	1.14269e-47	4.50453	6.01916e-16	6.0968e-18
ENSG00000241945	PWP2	21	44107373	44131181	4.65692	2.01384e-230	9.71696e-234	4.20151	2.11393e-11	4.44968e-13
ENSG00000226686	LINC01535	19	37251885	37265535	4.07451	1.02786e-60	4.79421e-63	3.85074	1.0025e-08	3.60954e-10
ENSG00000022556	NLRP2	19	54953130	55001142	2.05459	0.00114427	0.000292992	3.44952	9.76684e-09	3.50113e-10
ENSG00000223865	HLA-DPB1	6	33075990	33089696	3.64223	2.19823e-110	3.53556e-113	3.07821	1.52534e-12	2.59976e-14
ENSG00000281566	AL157778.1	X	98450688	98892061	1.98109	2.10976e-26	4.02101e-28	2.87105	6.80493e-51	3.76945e-54
ENSG00000242516	LINC00960	3	75672300	75742048	2.64895	1.01286e-63	4.07264e-66	2.80081	1.97422e-16	1.82784e-18
ENSG00000183186	C2CD4C	19	405445	409147	1.23826	3.39757e-08	3.50549e-09	2.58897	1.63327e-18	1.36999e-20
ENSG00000180574	EIF2S3B	12	10505602	10523135	2.866	6.23888e-84	1.65567e-86	2.5455	8.03997e-11	1.89296e-12
ENSG00000171587	DSCAM	21	40010999	40847158	3.68888	4.80407e-38	5.29278e-40	2.53162	3.29746e-12	5.7928e-14
ENSG00000280362	AC084759.3	15	53910769	53914712	3.61244	1.22964e-31	1.72061e-33	2.50506	0.00200221	0.000358233
ENSG00000133636	NTS	12	85874295	85882992	1.91322	1.39603e-49	9.43039e-52	2.4002	1.92017e-10	4.81676e-12
ENSG00000168389	MFSD2A	1	39955112	39969968	1.44554	1.18205e-38	1.25992e-40	2.13501	6.22787e-23	2.95697e-25
ENSG00000188897	AC099489.1	16	11359845	11527245	0.657324	0.00633381	0.00204047	2.13001	2.05575e-09	6.39321e-11
ENSG00000151948	GLT1D1	12	128853427	128984968	2.34076	4.43104e-05	8.11021e-06	2.10564	0.000849721	0.000128026
ENSG00000149418	ST14	11	130159782	130210362	1.67175	1.60112e-25	3.21898e-27	2.0556	4.75769e-29	1.32532e-31
ENSG00000167861	HID1	17	74950742	74973166	1.64374	8.38639e-43	7.28371e-45	1.97321	3.06396e-29	8.00115e-32
ENSG00000254585	MAGEL2	15	23643549	23647867	2.14553	2.04848e-59	1.00488e-61	1.88975	5.51847e-26	2.00878e-28
ENSG00000168398	BDKRB2	14	96204679	96244166	0.955229	2.18884e-16	8.53711e-18	1.87277	6.14254e-13	9.81873e-15
ENSG00000250266	LINC01612	4	170226535	170283723	1.75602	1.81663e-24	3.82755e-26	1.87044	7.97457e-11	1.86791e-12
ENSG00000102290	PCDH11X	X	91779261	92623230	1.54762	7.8398e-22	1.89769e-23	1.84831	5.33054e-25	2.19346e-27
ENSG00000274276	CBSL	21	6444869	6468040	3.15892	7.61372e-156	6.12282e-159	1.78875	7.92871e-05	8.20665e-06
ENSG00000133433	GSTT2B	22	23957414	23961186	1.51361	1.23681e-32	1.67096e-34	1.77049	2.86291e-07	1.42953e-08
ENSG00000211459	MT-RNR1	MT	648	1601	1.24515	3.47838e-15	1.56086e-16	1.74354	2.0614e-14	2.59367e-16
ENSG00000175106	TVP23C	17	15502264	15563595	0.985767	1.92246e-08	1.88768e-09	1.73722	3.36605e-18	2.85011e-20
ENSG00000277117	FP565260.3	21	5022493	5040666	1.47991	3.35461e-13	1.82635e-14	1.72107	1.17285e-12	1.96758e-14
ENSG00000151640	DPYSL4	10	132186948	132205759	0.689824	5.86685e-08	6.25608e-09	1.71768	3.82904e-15	4.36861e-17
ENSG00000187017	ESPN	1	6424776	6461367	1.29923	3.08273e-10	2.42205e-11	1.68555	6.84977e-12	1.28464e-13
ENSG00000169851	PCDH7	4	30720415	31146805	1.03728	1.61778e-13	8.52148e-15	1.67653	1.384e-15	1.46756e-17
ENSG00000006756	ARSD	X	2903972	2929349	0.890037	2.07584e-08	2.04829e-09	1.6588	8.21406e-42	9.10001e-45
ENSG00000135046	ANXA1	9	73151865	73170393	1.20108	3.18862e-05	5.65157e-06	1.61462	0.00232899	0.000427944
ENSG00000178726	THBD	20	23045633	23049672	1.77339	1.05539e-27	1.84174e-29	1.61232	6.59929e-07	3.62943e-08
ENSG00000169169	CPT1C	19	49690898	49713731	1.64233	1.70832e-47	1.2639e-49	1.57542	1.56582e-15	1.69753e-17
ENSG00000272674	PCDHB16	5	141181399	141186399	1.27921	3.11764e-10	2.45335e-11	1.57129	0.00351368	0.000705127
ENSG00000187513	GJA4	1	34792999	34795747	1.05814	9.14586e-06	1.43715e-06	1.56474	3.58952e-06	2.46838e-07
ENSG00000269994	AL513318.2	9	87008440	87042419	1.28209	8.38739e-12	5.41623e-13	1.55438	5.54479e-07	2.99683e-08
ENSG00000146938	NLGN4X	X	5840637	6228867	1.24931	1.38316e-53	8.2311e-56	1.51309	1.65327e-63	5.2331e-67
ENSG00000272734	ADIRF-AS1	10	86965345	86971311	2.21868	1.31253e-15	5.53088e-17	1.51146	1.98176e-08	7.60586e-10
ENSG00000236871	LINC00106	X	1396427	1399402	0.473428	0.00176008	0.0004736	1.50454	6.14076e-09	2.08952e-10
ENSG00000186310	NAP1L3	X	93670930	93673578	0.644163	0.00168832	0.000451985	1.50316	8.45309e-14	1.1706e-15
ENSG00000236017	ASMTL-AS1	X	1401769	1414028	0.353999	0.0197634	0.00759385	1.48941	9.63337e-12	1.8448e-13
ENSG00000251271	ALG1L7P	4	3935447	3942519	0.549221	0.000152606	3.15728e-05	1.48762	6.90986e-06	5.13988e-07
ENSG00000177519	RPRM	2	153477338	153478762	0.478108	0.00243704	0.000684849	1.48142	2.01841e-11	4.23264e-13
ENSG00000215146	BX322639.1	10	42331866	42367974	1.08129	8.1167e-06	1.25585e-06	1.4806	1.5829e-10	3.90808e-12
ENSG00000142794	NBPF3	1	21440128	21485005	0.937003	1.44607e-25	2.884e-27	1.47976	4.90504e-28	1.5526e-30
ENSG00000129991	TNNI3	19	55151767	55157773	1.54834	8.10427e-12	5.218e-13	1.47834	8.56885e-05	8.95739e-06
ENSG00000162069	BICDL2	16	3027682	3036944	1.14851	2.44031e-08	2.44349e-09	1.47827	5.72157e-12	1.05041e-13
ENSG00000182253	SYNM	15	99098217	99135593	0.890573	4.75821e-21	1.25508e-22	1.47215	1.64931e-13	2.42756e-15
ENSG00000165215	CLDN3	7	73768997	73770270	2.02929	9.74895e-16	4.0037e-17	1.46369	4.25508e-08	1.76776e-09
ENSG00000148798	INA	10	103277138	103290346	0.760769	5.77989e-06	8.71e-07	1.46019	1.57951e-08	5.92457e-10
ENSG00000184156	KCNQ3	8	132120859	132481095	-0.981038	6.17204e-14	3.11208e-15	1.45153	0.000313477	3.99629e-05
ENSG00000206159	GYG2P1	Y	12088010	12421587	2.02436	1.18205e-38	1.26428e-40	1.43445	3.82904e-15	4.39353e-17
ENSG00000186510	CLCNKA	1	16018875	16034050	1.05313	2.36758e-11	1.63741e-12	1.42456	1.81125e-15	1.97795e-17
ENSG00000184012	TMPRSS2	21	41464305	41531116	1.2017	2.17924e-20	6.05366e-22	1.42331	4.43647e-06	3.13506e-07
ENSG00000075213	SEMA3A	7	83955777	84492724	1.04188	1.17403e-08	1.12541e-09	1.40091	8.45309e-14	1.15985e-15
ENSG00000115963	RND3	2	150468195	150539011	1.48259	1.58494e-14	7.64746e-16	1.38879	9.78695e-10	2.78808e-11
ENSG00000235770	LINC00607	2	215611563	215848954	0.672812	2.74532e-06	3.85492e-07	1.3857	2.37543e-07	1.17108e-08
ENSG00000113083	LOX	5	122063195	122078360	0.420792	0.0217455	0.00850411	1.37547	2.54505e-22	1.2688e-24
ENSG00000172379	ARNT2	15	80404350	80597933	1.34134	1.62788e-72	5.89101e-75	1.37259	4.75769e-29	1.39301e-31
ENSG00000185112	FAM43A	3	194685883	194689037	1.9079	7.13348e-29	1.18174e-30	1.35829	0.000129641	1.43008e-05
ENSG00000186153	WWOX	16	78099430	79212667	1.52739	2.77839e-15	1.22665e-16	1.35355	2.09423e-05	1.78814e-06
ENSG00000180787	ZFP3	17	5078467	5096374	0.555716	0.000372466	8.38386e-05	1.35118	3.0231e-16	2.91856e-18
ENSG00000128965	CHAC1	15	40952962	40956512	-0.889726	6.22247e-07	7.80623e-08	1.34895	0.00416706	0.000869553
ENSG00000100413	POLR3H	22	41525799	41544606	0.670318	6.07889e-09	5.58759e-10	1.34679	5.72108e-09	1.92408e-10
ENSG00000273748	AL592183.1	GL000219.1	54224	83311	1.08949	1.9304e-12	1.15032e-13	1.34497	0.000189154	2.18686e-05
ENSG00000260528	FAM157C	16	90102271	90178344	1.60257	5.73861e-19	1.75366e-20	1.34204	1.70065e-11	3.47208e-13
ENSG00000176920	FUT2	19	48695971	48705951	1.23148	1.72587e-15	7.3837e-17	1.3388	1.83661e-10	4.57809e-12
ENSG00000189143	CLDN4	7	73799542	73832693	2.24455	1.4305e-29	2.27775e-31	1.32484	1.47663e-12	2.50058e-14
ENSG00000214717	ZBED1	X	2486414	2500976	0.471538	9.60862e-14	4.92215e-15	1.32353	9.85244e-25	4.13215e-27
ENSG00000077274	CAPN6	X	111245099	111270483	1.82918	9.47838e-48	6.55521e-50	1.30893	9.99021e-17	8.93324e-19
ENSG00000159176	CSRP1	1	201483530	201509456	0.89195	2.30527e-08	2.29878e-09	1.30482	4.08605e-09	1.33863e-10
ENSG00000269564	AC008753.2	19	53788782	53789168	1.07196	1.73956e-05	2.89437e-06	1.2939	6.12864e-11	1.37248e-12
ENSG00000204520	MICA	6	31399784	31415315	0.655844	3.1214e-08	3.19294e-09	1.28835	6.08522e-05	6.06259e-06
ENSG00000168830	HTR1E	6	86937528	87016679	1.00639	1.23481e-07	1.3793e-08	1.26708	3.36388e-11	7.26707e-13
ENSG00000067113	PLPP1	5	55424854	55534969	0.593157	1.31786e-07	1.47948e-08	1.26655	4.45253e-46	3.52341e-49
ENSG00000056998	GYG2	X	2828822	2882820	0.849728	6.42914e-41	6.25593e-43	1.26408	2.79461e-53	1.10572e-56
ENSG00000182378	PLCXD1	X	276322	303356	0.795828	8.77202e-37	1.00876e-38	1.26164	9.65382e-20	6.49343e-22
ENSG00000169515	CCDC8	19	46410329	46413564	0.580908	0.000105602	2.10441e-05	1.25633	3.59965e-08	1.47552e-09
ENSG00000105889	STEAP1B	7	22419444	22727613	1.62201	8.15627e-79	2.42688e-81	1.25378	1.6325e-28	4.909e-31
ENSG00000126010	GRPR	X	16123565	16153518	0.992986	6.78202e-10	5.63941e-11	1.2483	2.24888e-07	1.10513e-08
ENSG00000122674	CCZ1	7	5898725	5926550	1.38023	2.53171e-53	1.52697e-55	1.24179	3.85709e-08	1.59326e-09
ENSG00000179178	TMEM125	1	43269983	43274002	0.593065	2.16987e-09	1.88457e-10	1.23874	9.99098e-19	8.06426e-21
ENSG00000163492	CCDC141	2	178829757	179050086	1.61017	7.2786e-49	4.97532e-51	1.23687	6.84827e-40	1.02965e-42
ENSG00000196972	SMIM10L2B	X	135094985	135098712	0.905603	9.92296e-12	6.48763e-13	1.23573	1.47669e-09	4.41711e-11
ENSG00000185818	NAT8L	4	2059327	2069089	0.722366	0.000311755	6.9053e-05	1.23317	1.63671e-10	4.0539e-12
ENSG00000196659	TTC30B	2	177548998	177552796	1.16378	4.71717e-10	3.83899e-11	1.23084	3.0054e-09	9.60816e-11
ENSG00000196793	ZNF239	10	43556344	43574618	0.937171	4.24321e-11	3.06084e-12	1.22931	3.87552e-08	1.60394e-09
ENSG00000188321	ZNF559	19	9323772	9351162	1.46535	1.58755e-47	1.16178e-49	1.21976	0.000207009	2.42933e-05
ENSG00000173250	GPR151	5	146513103	146516190	1.41922	2.65446e-24	5.63553e-26	1.21483	3.28839e-05	2.99772e-06
ENSG00000169093	ASMTL	X	1403139	1453762	0.900792	6.04125e-25	1.23886e-26	1.21221	1.62542e-26	5.78806e-29
ENSG00000104833	TUBB4A	19	6494319	6502848	1.98342	1.73708e-29	2.79386e-31	1.21083	1.3633e-05	1.11658e-06
ENSG00000108797	CNTNAP1	17	42682531	42699993	1.07682	2.86893e-20	8.075e-22	1.2097	5.62582e-28	1.86978e-30
ENSG00000181754	AMIGO1	1	109504178	109509738	1.14581	1.02324e-14	4.83024e-16	1.20489	1.72141e-10	4.27729e-12
ENSG00000182107	TMEM30B	14	61277370	61281761	0.983701	3.45912e-11	2.45073e-12	1.20431	1.92869e-14	2.41144e-16
ENSG00000100027	YPEL1	22	21697536	21735794	1.2924	1.52407e-17	5.36826e-19	1.20041	0.000777768	0.000115288
ENSG00000197462	AC003975.1	7	125917871	125933832	1.30649	1.1023e-15	4.59179e-17	1.19592	1.64913e-09	5.03731e-11
ENSG00000178878	APOLD1	12	12725917	12829975	1.18439	7.4227e-27	1.3371e-28	1.19423	0.000251193	3.0512e-05
ENSG00000169249	ZRSR2	X	15790472	15823260	0.741042	1.21015e-22	2.78329e-24	1.18799	1.83982e-20	1.16472e-22
ENSG00000197976	AKAP17A	X	1591604	1602520	0.414256	1.58096e-09	1.36165e-10	1.18614	7.60251e-16	7.82089e-18
ENSG00000081692	JMJD4	1	227730425	227735411	0.697527	1.23156e-06	1.62227e-07	1.18416	1.93077e-05	1.63177e-06
ENSG00000076351	SLC46A1	17	28394642	28407197	0.812498	2.10904e-20	5.83443e-22	1.17927	3.44224e-07	1.75967e-08
ENSG00000107281	NPDC1	9	137039463	137046179	0.855573	1.49626e-07	1.70262e-08	1.17614	7.13928e-07	3.95465e-08
ENSG00000077092	RARB	3	25174332	25597932	-0.752182	0.0145508	0.00533705	1.16201	0.000274228	3.39611e-05
ENSG00000136167	LCP1	13	46125920	46211871	1.67667	7.68299e-23	1.73616e-24	1.15649	3.20648e-06	2.1796e-07
ENSG00000249550	LINC01234	12	113583886	113773726	0.883917	3.22138e-06	4.58531e-07	1.15588	3.43919e-06	2.35412e-07
ENSG00000184185	KCNJ12	17	21376357	21419870	1.19104	1.69816e-12	1.001e-13	1.15531	1.31885e-08	4.83204e-10
ENSG00000185215	TNFAIP2	14	103123442	103137439	1.46112	2.96702e-65	1.14529e-67	1.13859	4.9116e-13	7.69562e-15
ENSG00000135502	SLC26A10	12	57619527	57626151	0.470793	3.17628e-05	5.62713e-06	1.13757	3.35677e-07	1.71066e-08
ENSG00000249673	NOP14-AS1	4	2934882	2961738	0.861778	8.28898e-15	3.86619e-16	1.13581	3.47512e-13	5.38992e-15
ENSG00000225470	JPX	X	73944182	74070408	0.435879	1.38089e-11	9.19483e-13	1.13208	5.14031e-38	8.54211e-41
ENSG00000242732	RTL5	X	72127110	72131901	0.796507	1.63729e-11	1.10337e-12	1.12949	5.64142e-07	3.05352e-08
ENSG00000255823	MTRNR2L8	11	10507894	10509186	2.27956	7.72027e-51	4.90471e-53	1.12329	0.000550165	7.69718e-05
ENSG00000164794	KCNV1	8	109963636	109975771	1.20178	3.70976e-11	2.6462e-12	1.12085	3.50025e-07	1.79209e-08
ENSG00000188766	SPRED3	19	38388421	38399587	1.45265	2.74078e-40	2.73306e-42	1.11347	5.72108e-09	1.92069e-10
ENSG00000167311	ART5	11	3638512	3642316	0.520665	6.36862e-05	1.20919e-05	1.10779	3.37411e-09	1.0867e-10
ENSG00000099715	PCDH11Y	Y	5000226	5742224	2.29616	8.77202e-37	1.00637e-38	1.10589	0.0155619	0.00424612
ENSG00000236609	ZNF853	7	6615610	6624290	0.998827	4.39486e-24	9.36581e-26	1.10316	6.20762e-11	1.39508e-12
ENSG00000125872	LRRN4	20	6040546	6054060	1.40194	1.84371e-11	1.24841e-12	1.09757	0.0175789	0.00492159
ENSG00000124019	FAM124B	2	224378698	224402107	1.42236	3.60946e-13	1.97381e-14	1.09144	0.000627599	8.95563e-05
ENSG00000128833	MYO5C	15	52192322	52295804	0.38712	0.000395879	8.96497e-05	1.09109	1.33105e-15	1.40089e-17
ENSG00000162981	LRATD1	2	14632700	14650814	1.62521	3.02666e-30	4.57589e-32	1.08996	1.2325e-05	9.96771e-07
ENSG00000101265	RASSF2	20	4780023	4823608	0.757097	7.73719e-09	7.18654e-10	1.0891	0.000338042	4.37097e-05
ENSG00000151012	SLC7A11	4	138164097	138242349	0.594251	7.22137e-05	1.38388e-05	1.08706	0.000105227	1.12496e-05
ENSG00000183798	EMILIN3	20	41359962	41366818	0.946964	5.60234e-11	4.09982e-12	1.08484	2.97146e-06	1.99245e-07
ENSG00000170412	GPRC5C	17	74424851	74451653	0.699458	3.12454e-13	1.69104e-14	1.07774	6.20212e-19	4.80975e-21
ENSG00000015475	BID	22	17734138	17774770	1.00792	4.59233e-19	1.39229e-20	1.07588	1.9634e-13	2.92094e-15
ENSG00000253305	PCDHGB6	5	141408021	141512979	1.29323	7.8572e-21	2.09778e-22	1.06957	7.3115e-09	2.52839e-10
ENSG00000197763	TXNRD3	3	126607059	126655124	0.895676	1.35948e-14	6.51588e-16	1.06717	7.27721e-22	3.8583e-24
ENSG00000159784	FAM131B	7	143353400	143362770	1.45208	1.13095e-18	3.57428e-20	1.06442	2.08587e-10	5.29305e-12
ENSG00000007062	PROM1	4	15963076	16084378	1.20855	6.34668e-25	1.3066e-26	1.05513	4.77395e-06	3.41195e-07
ENSG00000174721	FGFBP3	10	91906584	91909486	0.358435	0.00473141	0.00146337	1.05068	2.29183e-12	3.97176e-14
ENSG00000254602	AP000662.1	11	57638024	57652790	0.556031	0.000481869	0.000111913	1.04678	3.88901e-09	1.26792e-10
ENSG00000183778	B3GALT5	21	39556442	39673137	0.822903	7.40737e-05	1.42369e-05	1.04653	1.4029e-05	1.15123e-06
ENSG00000159753	CARMIL2	16	67644988	67657569	0.817982	1.0511e-07	1.16649e-08	1.04046	3.89793e-07	2.01729e-08
ENSG00000197362	ZNF786	7	149069641	149090782	0.458694	0.010248	0.00356209	1.03907	1.73573e-07	8.19998e-09
ENSG00000273270	AC090114.2	7	128524016	128531069	0.748699	1.93198e-05	3.25803e-06	1.03153	7.23218e-10	1.99733e-11
ENSG00000166676	TVP23A	16	10760919	10818794	0.753053	8.95083e-07	1.15529e-07	1.02903	6.09193e-07	3.31183e-08
ENSG00000227403	LINC01806	2	161244730	161249050	1.12174	3.6192e-15	1.62696e-16	1.02894	2.7004e-05	2.36554e-06
ENSG00000274286	ADRA2B	2	96112876	96116571	1.12667	7.07042e-13	4.00288e-14	1.02547	2.89519e-08	1.1501e-09
ENSG00000187792	ZNF70	22	23738682	23751112	0.724113	3.66186e-09	3.26284e-10	1.02081	3.10266e-10	8.10223e-12
ENSG00000137968	SLC44A5	1	75202131	75611116	1.59309	9.96433e-31	1.48243e-32	1.01973	0.000312488	3.98005e-05
ENSG00000183248	PRR36	19	7868719	7874390	1.44535	4.15072e-23	9.21269e-25	1.01654	5.67552e-05	5.57806e-06
ENSG00000245532	NEAT1	11	65422774	65445540	1.23621	3.20622e-21	8.32818e-23	1.01632	2.47049e-21	1.38803e-23
ENSG00000140015	KCNH5	14	62699464	63102037	1.29132	5.76943e-15	2.62605e-16	1.01327	0.0386607	0.0131796
ENSG00000197457	STMN3	20	63639705	63657682	0.657261	1.68151e-06	2.25418e-07	1.01052	3.9433e-07	2.04389e-08
ENSG00000253313	C1orf210	1	43281877	43285617	1.12811	1.52322e-25	3.05011e-27	1.0063	0.000133472	1.48079e-05
ENSG00000166341	DCHS1	11	6621330	6655809	1.02878	8.09036e-28	1.40532e-29	1.00579	2.04407e-09	6.34072e-11
ENSG00000267080	ASB16-AS1	17	44175968	44186723	0.505055	0.00269665	0.000768551	1.00577	8.97245e-10	2.52334e-11
ENSG00000177352	CCDC71	3	49162535	49166331	0.916154	2.45416e-08	2.46107e-09	1.00153	3.49764e-05	3.21339e-06
ENSG00000118495	PLAGL1	6	143940300	144064599	-0.673552	0.00196418	0.000535787	0.995745	0.000515262	7.13547e-05
ENSG00000163412	EIF4E3	3	71675414	71754773	0.914758	1.4842e-20	4.05813e-22	0.994711	1.11559e-12	1.85388e-14
ENSG00000198168	SVIP	11	22813799	22830299	1.13238	1.47626e-12	8.65457e-14	0.9942	2.35197e-06	1.51872e-07
ENSG00000182013	PNMA8A	19	46466491	46471563	0.555043	4.90528e-17	1.78697e-18	0.994153	5.06375e-10	1.37042e-11
ENSG00000170373	CST1	20	23747553	23751268	-0.676877	0.0456713	0.0199487	0.993495	0.011118	0.00282466
ENSG00000083307	GRHL2	8	101492439	101669726	0.893776	2.6296e-12	1.60293e-13	0.990299	3.35753e-10	8.9272e-12
ENSG00000238178	AC078993.1	X	16152941	16170869	0.556379	5.50274e-09	5.03145e-10	0.985074	5.53536e-21	3.28521e-23
ENSG00000163435	ELF3	1	202007945	202017183	0.758673	4.11765e-06	6.00345e-07	0.983943	0.000857135	0.000129279
ENSG00000228624	HDAC2-AS2	6	113969701	114471705	0.829605	8.72004e-11	6.5076e-12	0.983198	2.7856e-06	1.82959e-07
ENSG00000055163	CYFIP2	5	157266079	157395595	1.17248	1.37235e-38	1.48988e-40	0.981006	4.8561e-22	2.53622e-24
ENSG00000234420	ZNF37BP	10	42513510	42552822	0.353307	0.00124232	0.000321495	0.97866	6.14076e-09	2.08927e-10
ENSG00000173077	2020-12-01	9	114850968	115402644	-0.517063	0.00113938	0.000291465	0.9774	4.34965e-07	2.28548e-08
ENSG00000184908	CLCNKB	1	16043736	16057308	0.671247	2.29355e-07	2.67258e-08	0.97706	3.51443e-05	3.23159e-06
ENSG00000132846	ZBED3	5	77072072	77087285	0.691392	4.00886e-08	4.19424e-09	0.976747	1.15123e-06	6.78697e-08
ENSG00000183665	TRMT12	8	124450820	124462150	0.957658	3.04222e-29	4.94192e-31	0.972523	1.58544e-18	1.30479e-20
ENSG00000141040	ZNF287	17	16546954	16569204	0.879943	8.13438e-10	6.82935e-11	0.972522	1.31737e-06	7.92278e-08
ENSG00000143126	CELSR2	1	109249539	109275751	0.767128	7.74842e-17	2.89125e-18	0.968655	4.36078e-21	2.51909e-23
ENSG00000185272	RBM11	21	14216130	14228372	1.05712	1.13537e-18	3.59739e-20	0.968056	0.000104506	1.11395e-05
ENSG00000253507	AC104257.1	8	131308545	131317632	1.12792	1.58183e-17	5.58444e-19	0.967731	1.43507e-09	4.26989e-11
ENSG00000128253	RFPL2	22	32190435	32205001	2.03617	1.57575e-33	2.0275e-35	0.964761	8.60011e-06	6.56731e-07
ENSG00000240771	ARHGEF25	12	57610180	57617245	0.344852	1.13725e-08	1.08558e-09	0.96378	9.75853e-17	8.64885e-19
ENSG00000198890	PRMT6	1	107056674	107067636	0.657268	4.83882e-11	3.51773e-12	0.963121	6.18382e-09	2.10907e-10
ENSG00000186439	TRDN	6	123216339	123637093	1.38398	7.37177e-50	4.92044e-52	0.959806	1.00347e-08	3.62099e-10
ENSG00000174516	PELI3	11	66466327	66477337	0.545459	0.000216473	4.61845e-05	0.952205	7.84171e-06	5.93232e-07
ENSG00000102096	PIM2	X	48913182	48919024	0.791699	8.45584e-61	3.87602e-63	0.94854	4.93177e-12	8.89802e-14
ENSG00000237515	SHISA9	16	12901598	13240416	0.508818	9.01359e-08	9.90154e-09	0.948062	9.43439e-14	1.32889e-15
ENSG00000176387	HSD11B2	16	67430652	67437553	0.812288	3.77347e-07	4.56701e-08	0.947732	6.07098e-08	2.60384e-09
ENSG00000167393	PPP2R3B	X	333933	386955	0.394384	8.03837e-05	1.56566e-05	0.946606	3.12174e-10	8.17676e-12
ENSG00000157693	TMEM268	9	114611206	114646422	0.376347	0.00112097	0.000286311	0.943468	1.15877e-12	1.93479e-14
ENSG00000051128	HOMER3	19	18929201	18941261	0.823242	4.08424e-10	3.27461e-11	0.942853	7.30067e-08	3.22947e-09
ENSG00000176108	CHMP6	17	80991598	81009517	0.58918	0.000867602	0.000216081	0.941665	0.000504648	6.96452e-05
ENSG00000267640	AC016582.3	19	37817359	37832160	0.331102	0.00502249	0.00156955	0.939891	6.70617e-13	1.08258e-14
ENSG00000128268	MGAT3	22	39457012	39492194	0.814402	1.24509e-28	2.09267e-30	0.931617	3.0231e-16	2.90511e-18
ENSG00000189430	NCR1	19	54906148	54916140	0.909293	0.000215609	4.59481e-05	0.928214	0.0269366	0.00832164
ENSG00000168461	RAB31	18	9708275	9862551	0.418935	0.000826082	0.00020481	0.92758	2.29766e-05	1.97093e-06
ENSG00000154645	CHODL	21	17901263	18267373	0.678695	2.18022e-11	1.49906e-12	0.926939	1.66758e-06	1.03325e-07
ENSG00000130021	PUDP	X	6667865	7148190	0.395609	1.57409e-06	2.09625e-07	0.925197	5.816e-23	2.71539e-25
ENSG00000150455	TIRAP	11	126283065	126298845	0.758851	2.04997e-12	1.22322e-13	0.923071	4.61248e-08	1.93449e-09
ENSG00000224050	RP1-90G24.6	22	32273420	32277186	1.4905	5.04643e-14	2.51612e-15	0.922365	0.00112842	0.000180018
ENSG00000006016	CRLF1	19	18572220	18607741	1.14924	1.55522e-05	2.55639e-06	0.92206	0.00228543	0.000418131
ENSG00000125459	MSTO1	1	155610188	155614971	0.431375	1.73858e-05	2.88995e-06	0.920304	1.30249e-08	4.7618e-10
ENSG00000110881	ASIC1	12	50057548	50083611	0.878625	8.68387e-15	4.07831e-16	0.915582	1.17423e-06	6.95969e-08
ENSG00000187123	LYPD6	2	149329985	149474138	0.529936	0.000183654	3.85326e-05	0.910571	1.6787e-06	1.04279e-07
ENSG00000205181	LINC00654	20	5482736	5526709	1.13596	4.11328e-18	1.37275e-19	0.906432	1.59783e-06	9.86235e-08
ENSG00000110455	ACCS	11	44065925	44084237	1.25586	4.93653e-20	1.40533e-21	0.904233	0.000107457	1.15136e-05
ENSG00000132718	SYT11	1	155859567	155885199	1.69591	9.50164e-51	6.13091e-53	0.903971	0.00395889	0.000816401
ENSG00000078269	SYNJ2	6	157981863	158099176	0.460854	1.75438e-06	2.36315e-07	0.903947	1.27849e-13	1.82107e-15
ENSG00000173698	ADGRG2	X	18989307	19122637	1.42565	4.76431e-59	2.41376e-61	0.903745	1.27239e-14	1.55059e-16
ENSG00000138031	ADCY3	2	24819169	24919839	0.353394	1.67115e-06	2.23895e-07	0.903362	1.45069e-19	1.00418e-21
ENSG00000169297	NR0B1	X	30304206	30309390	0.502875	1.24525e-05	2.00181e-06	0.898209	1.29739e-06	7.79233e-08
ENSG00000167487	KLHL26	19	18637025	18671721	0.63068	1.69042e-05	2.79989e-06	0.895755	1.43795e-06	8.77312e-08
ENSG00000167680	SEMA6B	19	4542593	4559684	0.962807	2.19715e-15	9.52365e-17	0.89218	4.74406e-08	1.99343e-09
ENSG00000170873	MTSS1	8	124550790	124728429	0.551274	4.2563e-08	4.46338e-09	0.891271	6.6846e-12	1.24308e-13
ENSG00000162374	ELAVL4	1	50024029	50203786	0.883647	7.09061e-07	9.00368e-08	0.889522	0.000418399	5.59212e-05
ENSG00000125772	GPCPD1	20	5544439	5611006	0.759403	1.82924e-12	1.08563e-13	0.887518	1.41957e-10	3.45991e-12
ENSG00000156398	SFXN2	10	102714538	102743492	0.818776	5.73138e-17	2.11096e-18	0.886588	0.000142904	1.59335e-05
ENSG00000169991	IFFO2	1	18904280	18956676	0.795574	7.63784e-12	4.87691e-13	0.886083	1.8989e-06	1.19912e-07
ENSG00000139194	RBP5	12	7115736	7128889	0.845342	3.99622e-06	5.81035e-07	0.885963	0.000889769	0.000135116
ENSG00000167964	RAB26	16	2140803	2154165	0.791875	2.24623e-05	3.83133e-06	0.885239	0.000647323	9.30232e-05
ENSG00000140104	CLBA1	14	104985775	105010482	0.51538	2.09568e-05	3.55431e-06	0.883765	1.40561e-07	6.50695e-09
ENSG00000250682	LINC00491	5	102604220	102671765	1.29338	3.28869e-10	2.60239e-11	0.880015	0.00224045	0.000408655
ENSG00000182810	DDX28	16	68021274	68023442	0.533638	0.00119346	0.000307123	0.877931	0.000426515	5.73434e-05
ENSG00000224660	SH3BP5-AS1	3	15254184	15264515	0.440656	0.00295979	0.000851877	0.874178	1.13301e-09	3.27252e-11
ENSG00000182158	CREB3L2	7	137874979	138002086	0.412281	2.86002e-08	2.89337e-09	0.871065	3.78419e-11	8.20501e-13
ENSG00000269386	RAB11B-AS1	19	8374373	8390685	0.579697	1.85705e-05	3.11077e-06	0.865829	4.58859e-07	2.42193e-08
ENSG00000285543	AC022168.1	16	10214784	10227581	1.06289	6.2762e-10	5.20367e-11	0.865806	0.0128562	0.00334706
ENSG00000166199	ALKBH3	11	43880811	43920274	0.540019	2.02838e-06	2.75344e-07	0.865449	7.69403e-07	4.30457e-08
ENSG00000170854	RIOX2	3	97941818	97972457	-0.323235	0.00564133	0.00178948	0.864423	4.44831e-05	4.22884e-06
ENSG00000115604	IL18R1	2	102311529	102398775	0.408949	0.000675854	0.000163596	0.859982	1.12306e-06	6.57641e-08
ENSG00000140832	MARVELD3	16	71626161	71642114	1.07579	1.17357e-18	3.74675e-20	0.857954	5.83094e-07	3.16071e-08
ENSG00000051108	HERPUD1	16	56932142	56944864	-0.903521	1.52096e-17	5.34507e-19	0.856313	0.00780323	0.00185432
ENSG00000149328	GLB1L2	11	134331874	134378341	0.587862	2.73858e-06	3.84304e-07	0.856252	5.60096e-05	5.49592e-06
ENSG00000282508	LINC01002	19	198264	246544	1.10084	5.84124e-15	2.67753e-16	0.850535	0.000109944	1.18409e-05
ENSG00000197375	SLC22A5	5	132369752	132395614	0.814581	9.20923e-08	1.01387e-08	0.84907	7.25364e-07	4.03522e-08
ENSG00000269028	MTRNR2L12	3	96617188	96618236	0.411851	0.0211506	0.00822024	0.848713	0.000113021	1.22666e-05
ENSG00000184227	ACOT1	14	73537143	73543796	2.01122	4.39225e-50	2.89637e-52	0.846743	0.000252762	3.07427e-05
ENSG00000189184	PCDH18	4	137518918	137532494	0.637404	7.87432e-09	7.32657e-10	0.846668	1.43854e-08	5.33887e-10
ENSG00000129038	LOXL1	15	73925989	73952137	0.448533	0.00056243	0.000132523	0.846232	3.44392e-08	1.40624e-09
ENSG00000275832	ARHGAP23	17	38419280	38512385	0.709228	7.37743e-11	5.4641e-12	0.846109	0.000826867	0.000123929
ENSG00000130766	SESN2	1	28259518	28282491	-0.601497	0.000106473	2.12689e-05	0.842662	0.013202	0.00345903
ENSG00000126822	PLEKHG3	14	64704102	64750249	0.744106	4.02804e-21	1.056e-22	0.841795	1.10869e-11	2.14069e-13
ENSG00000220785	MTMR9LP	1	32231658	32241620	0.946114	2.79749e-13	1.50954e-14	0.841186	4.08956e-05	3.83846e-06
ENSG00000161082	CELF5	19	3224661	3297076	1.15435	4.42244e-10	3.57067e-11	0.838524	0.000842339	0.000126647
ENSG00000129946	SHC2	19	416583	460996	0.787388	6.15093e-08	6.58375e-09	0.837784	5.67552e-05	5.5752e-06
ENSG00000169084	DHRSX	X	2219506	2502805	0.40518	1.21059e-12	7.00947e-14	0.837569	3.60574e-21	2.05439e-23
ENSG00000113721	PDGFRB	5	150113839	150155872	-0.600016	0.000332791	7.42659e-05	0.831082	0.000242241	2.9233e-05
ENSG00000242082	SLC5A4-AS1	22	32205115	32278382	1.62849	1.79568e-21	4.50544e-23	0.831078	0.000867315	0.000131295
ENSG00000169100	SLC25A6	X	1386152	1392113	0.408677	0.000215407	4.58877e-05	0.829237	4.64822e-06	3.30308e-07
ENSG00000198624	CCDC69	5	151181052	151224093	0.416402	2.18749e-05	3.71706e-06	0.828969	9.06395e-10	2.5606e-11
ENSG00000160161	CILP2	19	19538248	19546659	0.780506	2.35782e-06	3.25562e-07	0.828258	0.00163737	0.000280518
ENSG00000164483	SAMD3	6	130144315	130365425	1.05685	9.84724e-31	1.45709e-32	0.828251	1.90784e-07	9.16403e-09
ENSG00000105605	CACNG7	19	53909335	53943941	1.95183	8.84552e-19	2.76711e-20	0.826534	0.0175643	0.00491611
ENSG00000103226	NOMO3	16	16232528	16294811	0.711638	6.9172e-14	3.49893e-15	0.823519	1.99273e-11	4.16302e-13
ENSG00000113739	STC2	5	173314713	173329503	-0.824624	2.32831e-10	1.80685e-11	0.821131	0.0214765	0.00633062
ENSG00000152229	PSTPIP2	18	45983536	46072272	-0.711995	0.00269994	0.000769706	0.819899	0.0112867	0.00287593
ENSG00000186301	MST1P2	1	16645622	16650289	0.392113	0.000694252	0.000168441	0.817888	1.52655e-05	1.25874e-06
ENSG00000196812	ZSCAN16	6	28124609	28130082	0.67078	6.45223e-07	8.1256e-08	0.816624	1.48134e-06	9.06131e-08
ENSG00000130303	BST2	19	17402939	17405630	1.10597	3.27512e-43	2.76548e-45	0.812052	0.00272826	0.000520306
ENSG00000174353	STAG3L3	7	72969696	73005922	0.610512	0.000152606	3.15767e-05	0.811558	3.62344e-07	1.8609e-08
ENSG00000168269	FOXI1	5	170105897	170109734	-0.983398	4.65335e-05	8.56201e-06	0.810935	0.0105523	0.00264704
ENSG00000054179	ENTPD2	9	137048107	137054061	1.20348	1.36994e-18	4.40671e-20	0.80961	0.00518117	0.00112405
ENSG00000104450	SPAG1	8	100157906	100259278	0.811707	5.76354e-10	4.7508e-11	0.808609	4.38417e-06	3.08769e-07
ENSG00000102271	KLHL4	X	87517409	87670050	0.693343	5.76668e-16	2.34655e-17	0.808055	0.00010073	1.06907e-05
ENSG00000197557	TTC30A	2	177612999	177618742	0.638126	3.18019e-11	2.24033e-12	0.807238	1.49338e-10	3.66344e-12
ENSG00000198934	MAGEE1	X	76427710	76431342	0.483468	1.7334e-10	1.32706e-11	0.805476	2.91201e-16	2.76523e-18
ENSG00000186638	KIF24	9	34252381	34311371	0.515187	1.05463e-06	1.36971e-07	0.805386	2.99504e-07	1.50262e-08
ENSG00000162341	TPCN2	11	69048932	69136316	0.520783	5.83869e-09	5.36211e-10	0.802802	1.61777e-11	3.25599e-13
ENSG00000138119	MYOF	10	93306429	93482334	0.833812	1.9907e-16	7.74829e-18	0.802253	2.03031e-05	1.72602e-06
ENSG00000138083	SIX3	2	44941702	44946071	1.15703	2.86303e-09	2.52343e-10	0.801169	0.00360939	0.000729687
ENSG00000140398	NEIL1	15	75346955	75357115	0.50068	0.00010612	2.11728e-05	0.800077	2.20992e-09	6.90763e-11
ENSG00000129480	DTD2	14	31446036	31457506	0.51229	0.000117537	2.37059e-05	0.799213	2.21347e-05	1.89311e-06
ENSG00000158764	ITLN2	1	160945025	160954809	0.895398	3.68188e-13	2.01637e-14	0.797878	0.00753432	0.00177101
ENSG00000099910	KLHL22	22	20441519	20495844	0.755351	8.81816e-14	4.51013e-15	0.796475	1.1995e-07	5.4389e-09
ENSG00000158023	WDR66	12	121918592	122003927	1.14129	2.0127e-39	2.08797e-41	0.795607	1.06616e-06	6.16733e-08
ENSG00000158874	APOA2	1	161222292	161223631	-0.669529	0.000214615	4.5672e-05	0.795327	2.97154e-08	1.18749e-09
ENSG00000173898	SPTBN2	11	66685248	66729226	0.423961	0.00152725	0.000404196	0.794939	5.76729e-06	4.20327e-07
ENSG00000166402	TUB	11	8019244	8106112	0.992483	1.41952e-59	6.84932e-62	0.79373	6.73243e-12	1.2573e-13
ENSG00000185156	MFSD6L	17	8797110	8799365	1.18908	6.1276e-11	4.50885e-12	0.792601	0.00326034	0.000645257
ENSG00000246067	RAB30-DT	11	83072052	83107789	0.442698	0.000363627	8.17028e-05	0.792261	6.94959e-08	3.04117e-09
ENSG00000014138	POLA2	11	65261920	65305589	0.540031	7.88922e-06	1.21875e-06	0.792178	7.88433e-05	8.14375e-06
ENSG00000153904	DDAH1	1	85318481	85578363	0.86561	3.41544e-11	2.41704e-12	0.789959	2.14471e-06	1.3781e-07
ENSG00000179163	FUCA1	1	23845077	23868294	0.71156	6.63701e-13	3.74683e-14	0.78987	3.2073e-10	8.47701e-12
ENSG00000133169	BEX1	X	103062651	103064171	0.421304	0.000148324	3.0619e-05	0.787139	1.9065e-05	1.60522e-06
ENSG00000023572	GLRX2	1	193090866	193106114	0.344143	0.0194367	0.00744645	0.78653	0.00139761	0.000231479
ENSG00000205885	C1RL-AS1	12	7108052	7122501	0.389654	0.00500469	0.00156124	0.785812	7.76993e-05	8.00542e-06
ENSG00000147364	FBXO25	8	406428	477967	0.676293	6.27881e-09	5.78145e-10	0.785392	9.45484e-07	5.3645e-08
ENSG00000142408	CACNG8	19	53963040	53990215	1.65148	2.72933e-21	7.0236e-23	0.785078	0.0237983	0.00714871
ENSG00000148600	CDHR1	10	84194537	84219621	-0.300505	0.0143274	0.00524525	0.780702	2.16803e-07	1.06368e-08
ENSG00000115414	FN1	2	215360440	215436073	0.893411	1.527e-51	9.57829e-54	0.779854	0.00390257	0.000803551
ENSG00000172006	ZNF554	19	2819868	2836735	0.52567	8.90532e-05	1.74812e-05	0.779557	1.6472e-06	1.01932e-07
ENSG00000135636	DYSF	2	71453722	71686768	0.46713	4.62531e-05	8.49927e-06	0.775864	2.08587e-10	5.30657e-12
ENSG00000172748	ZNF596	8	232137	264703	0.568957	0.00338067	0.000992861	0.775482	1.69555e-05	1.41419e-06
ENSG00000183307	TMEM121B	22	17116297	17121367	0.309751	0.0135932	0.00493297	0.77106	4.82734e-10	1.2988e-11
ENSG00000174672	BRSK2	11	1389899	1462689	0.544851	1.86671e-05	3.12845e-06	0.770672	5.18482e-06	3.72132e-07
ENSG00000242173	ARHGDIG	16	280450	283010	0.366468	0.0419934	0.0180908	0.768727	1.17661e-05	9.39574e-07
ENSG00000130985	UBA1	X	47190861	47215128	0.275419	1.64785e-07	1.88704e-08	0.764996	5.37492e-38	9.3573e-41
ENSG00000182841	RRP7BP	22	42555223	42582038	0.531744	6.16406e-05	1.16837e-05	0.76373	1.06004e-05	8.33804e-07
ENSG00000106868	SUSD1	9	112040785	112175408	0.543963	5.17615e-07	6.38121e-08	0.763723	4.32445e-05	4.08594e-06
ENSG00000143878	RHOB	2	20447074	20449440	1.07971	3.09746e-15	1.37997e-16	0.760673	4.40716e-06	3.11085e-07
ENSG00000165238	WNK2	9	93184916	93320572	0.712909	1.20822e-06	1.58667e-07	0.760017	1.74408e-05	1.46018e-06
ENSG00000092068	SLC7A8	14	23125295	23183674	0.681804	2.31219e-40	2.28709e-42	0.758311	4.44831e-05	4.23112e-06
ENSG00000172831	CES2	16	66934444	66945096	0.470948	1.37069e-07	1.54541e-08	0.757269	4.75966e-11	1.04707e-12
ENSG00000167447	SMG8	17	59209400	59215247	0.718961	7.58693e-27	1.37279e-28	0.756047	1.61415e-17	1.41782e-19
ENSG00000188707	ZBED6CL	7	150322639	150332721	0.665537	4.08811e-11	2.94567e-12	0.755157	9.55254e-06	7.408e-07
ENSG00000148832	PAOX	10	133379261	133391694	0.459597	0.00100514	0.000254134	0.754927	7.56985e-07	4.22311e-08
ENSG00000196371	FUT4	11	94543840	94549898	0.294014	0.00760343	0.00252384	0.754471	1.04746e-06	6.02596e-08
ENSG00000188636	RTL6	22	44492583	44498233	0.555191	4.09667e-13	2.25342e-14	0.753746	2.18476e-13	3.30212e-15
ENSG00000068654	POLR1A	2	86020216	86106155	0.306719	0.000173069	3.61029e-05	0.753063	1.1863e-05	9.53769e-07
ENSG00000143337	TOR1AIP1	1	179882042	179925000	0.693582	5.76364e-19	1.77057e-20	0.752994	1.23188e-09	3.59708e-11
ENSG00000113369	ARRDC3	5	91368631	91383317	1.01599	5.31621e-08	5.63044e-09	0.748877	3.43835e-07	1.75496e-08
ENSG00000225921	NOL7	6	13615335	13632739	0.862327	4.84007e-44	4.00906e-46	0.74638	1.17661e-05	9.42559e-07
ENSG00000142494	SLC47A1	17	19495385	19579034	1.36775	3.05969e-17	1.09987e-18	0.74613	0.0071455	0.00165731
ENSG00000120784	ZFP30	19	37613749	37692337	0.479467	6.32108e-08	6.77603e-09	0.745142	9.31592e-09	3.32474e-10
ENSG00000149809	TM7SF2	11	65111845	65116408	0.274749	0.0425668	0.0183754	0.74424	1.14457e-06	6.73863e-08
ENSG00000117242	PINK1-AS	1	20642657	20652193	0.474317	4.69512e-06	6.91903e-07	0.742764	1.33561e-09	3.95282e-11
ENSG00000105173	CCNE1	19	29811991	29824312	0.692027	4.61693e-17	1.67821e-18	0.742477	2.04938e-08	7.91403e-10
ENSG00000254122	PCDHGB7	5	141417645	141512979	1.24508	5.75148e-13	3.21916e-14	0.742312	2.78047e-05	2.45329e-06
ENSG00000122512	PMS2	7	5970925	6009106	0.339554	0.00125215	0.000324543	0.739432	3.05365e-07	1.53927e-08
ENSG00000130540	SULT4A1	22	43824509	43862513	0.542134	1.33406e-06	1.76364e-07	0.736706	9.34855e-09	3.34379e-10
ENSG00000275074	NUDT18	8	22106874	22109419	0.830737	4.20683e-07	5.11856e-08	0.734922	0.00423791	0.000888697
ENSG00000168040	FADD	11	70203163	70207390	0.602468	5.74361e-17	2.12008e-18	0.734392	1.35282e-06	8.15736e-08
ENSG00000159208	CIART	1	150282543	150287093	0.776932	7.53146e-05	1.4516e-05	0.734052	0.0375962	0.0127304
ENSG00000196152	ZNF79	9	127424374	127445372	0.364888	0.0181371	0.00689018	0.732371	0.000196248	2.2813e-05
ENSG00000143653	SCCPDH	1	246724409	246768137	0.44775	2.35068e-06	3.24388e-07	0.731823	7.85523e-14	1.05673e-15
ENSG00000157734	SNX22	15	64151715	64157481	0.717185	9.74977e-05	1.928e-05	0.731197	0.000664886	9.62173e-05
ENSG00000221890	NPTXR	22	38818452	38844028	0.596242	2.26551e-06	3.11178e-07	0.730518	1.16586e-06	6.89167e-08
ENSG00000186335	SLC36A2	5	151314972	151347590	-0.473466	0.0339726	0.0141883	0.728431	0.000213826	2.51948e-05
ENSG00000280143	AP000892.4	11	117204967	117210292	1.34705	1.44251e-12	8.43348e-14	0.728425	0.0198649	0.00573922
ENSG00000235750	KIAA0040	1	175156986	175192999	0.547283	4.62625e-14	2.28801e-15	0.727351	4.35437e-08	1.82279e-09
ENSG00000160055	TMEM234	1	32214472	32222359	0.436812	7.56878e-05	1.46384e-05	0.727057	4.26359e-08	1.77467e-09
ENSG00000131323	TRAF3	14	102777449	102911500	0.602314	8.17885e-15	3.80167e-16	0.726737	2.4139e-06	1.56553e-07
ENSG00000115226	FNDC4	2	27491883	27495200	0.441815	2.13291e-06	2.91077e-07	0.726172	5.95255e-06	4.35243e-07
ENSG00000159712	ANKRD18CP	9	97156570	97221235	0.566518	0.00125277	0.000324835	0.725524	0.00013256	1.46543e-05
ENSG00000131797	CLUHP3	16	31700590	31711986	0.377376	0.000229454	4.92492e-05	0.724616	2.64225e-05	2.30625e-06
ENSG00000165138	ANKS6	9	98731329	98796965	0.793847	5.76197e-19	1.76543e-20	0.724595	0.000105256	1.1261e-05
ENSG00000198626	RYR2	1	237042184	237833988	1.11689	2.67684e-10	2.09454e-11	0.724069	0.0100514	0.00249278
ENSG00000260804	LINC01963	2	216217045	216220192	0.433865	0.00199967	0.000547074	0.723413	0.0016799	0.000289266
ENSG00000274180	NATD1	17	21238870	21253410	0.475927	2.24727e-08	2.23552e-09	0.72204	5.85293e-14	7.78106e-16
ENSG00000073670	ADAM11	17	44758988	44781846	0.716931	5.54898e-07	6.88993e-08	0.72189	0.000107819	1.15608e-05
ENSG00000118523	CCN2	6	131948176	131951372	0.925301	6.26611e-12	3.95569e-13	0.721426	5.34017e-05	5.1724e-06
ENSG00000186838	SELENOV	19	39515113	39520686	1.04667	4.69597e-11	3.40632e-12	0.719534	0.000206275	2.41908e-05
ENSG00000132182	NUP210	3	13316235	13420322	0.618137	1.40297e-11	9.35315e-13	0.718326	9.43439e-14	1.32187e-15
ENSG00000215009	ACSM4	12	7304284	7328724	0.406273	0.00235596	0.000657244	0.718005	0.017902	0.00503621
ENSG00000137868	STRA6	15	74179466	74212267	0.636066	9.84319e-07	1.2776e-07	0.714102	0.00184619	0.00032579
ENSG00000115339	GALNT3	2	165747588	165794659	1.48722	2.89656e-22	6.75516e-24	0.711399	0.0392819	0.0134349
ENSG00000278709	NKILA	20	57710156	57712780	0.456192	0.00356879	0.00105701	0.711044	0.000216193	2.55251e-05
ENSG00000174460	ZCCHC12	X	118823824	118826968	0.561375	1.63191e-05	2.69032e-06	0.710688	0.00141542	0.000235548
ENSG00000140557	ST8SIA2	15	92393881	92468728	0.522287	0.00323608	0.000944181	0.710502	0.000659954	9.52565e-05
ENSG00000134532	SOX5	12	23529504	24562544	0.663419	5.44781e-10	4.47741e-11	0.710058	5.36024e-06	3.87267e-07
ENSG00000168297	PXK	3	58332880	58426127	0.275762	0.0112113	0.00395077	0.708955	0.000562207	7.91014e-05
ENSG00000214076	CPSF1P1	22	32269381	32273110	1.46161	1.29427e-14	6.19293e-16	0.708557	0.0052817	0.0011523
ENSG00000167695	TLCD3A	17	732412	742968	1.34353	3.2902e-105	6.08561e-108	0.707631	3.20627e-11	6.87582e-13
ENSG00000197841	ZNF181	19	34734155	34745378	0.390964	0.000200897	4.24898e-05	0.706755	1.68328e-05	1.40189e-06
ENSG00000144120	TMEM177	2	119679167	119686507	0.524864	7.73967e-06	1.19378e-06	0.706084	4.16015e-06	2.91675e-07
ENSG00000104381	GDAP1	8	74321130	74488872	0.655691	1.66597e-18	5.42597e-20	0.705074	3.93046e-12	7.02678e-14
ENSG00000204946	ZNF783	7	149262171	149297302	0.333414	0.00110323	0.000281154	0.704547	6.29271e-06	4.62106e-07
ENSG00000039068	CDH1	16	68737292	68835541	0.851077	5.83546e-15	2.67e-16	0.70425	0.000925238	0.000141967
ENSG00000198833	UBE2J1	6	89326625	89352722	0.305094	0.000761703	0.000186827	0.703229	2.66342e-05	2.32683e-06
ENSG00000143067	ZNF697	1	119619377	119648266	0.464306	1.63597e-09	1.41035e-10	0.70289	5.18177e-07	2.78832e-08
ENSG00000164638	SLC29A4	7	5274369	5306870	0.722873	3.35165e-07	4.0217e-08	0.702643	0.00303366	0.000592232
ENSG00000263465	SRSF8	11	95067197	95071224	0.681609	7.28941e-10	6.09063e-11	0.702091	1.77887e-06	1.11206e-07
ENSG00000248008	NRAV	12	120488079	120495946	0.639057	5.53299e-07	6.86118e-08	0.699373	0.000269218	3.32172e-05
ENSG00000175567	UCP2	11	73974672	73983246	0.620763	1.71953e-16	6.65134e-18	0.698797	4.09763e-14	5.28538e-16
ENSG00000254447	OR7E11P	11	67735600	67784229	1.36836	2.01675e-10	1.55209e-11	0.698667	0.00525286	0.00114355
ENSG00000204104	TRAF3IP1	2	238320441	238400897	0.281049	0.000363051	8.14857e-05	0.698147	3.2728e-11	7.0444e-13
ENSG00000168314	MOBP	3	39467198	39529479	-1.06471	1.32482e-12	7.70284e-14	0.697813	1.20574e-07	5.47672e-09
ENSG00000176410	DNAJC30	7	73680918	73683453	0.436368	0.0236929	0.00938382	0.697671	0.0153115	0.00415714
ENSG00000164078	MST1R	3	49887002	49903873	0.399207	0.010099	0.00350279	0.69437	0.000387056	5.10905e-05
ENSG00000196814	MVB12B	9	126326829	126507041	0.317338	0.00279589	0.000800433	0.693875	2.94101e-06	1.96424e-07
ENSG00000137720	C11orf1	11	111878935	111885975	0.433612	1.54668e-05	2.54111e-06	0.693198	1.67188e-06	1.03723e-07
ENSG00000124549	BTN2A3P	6	26421391	26432383	0.664605	2.09918e-06	2.85968e-07	0.692416	0.000369071	4.85105e-05
ENSG00000268895	A1BG-AS1	19	58347718	58355455	0.853827	2.395e-06	3.31275e-07	0.691845	0.00649142	0.00147581
ENSG00000164659	KIAA1324L	7	86876906	87059654	0.262692	0.00017184	3.58051e-05	0.691606	2.71107e-12	4.71975e-14
ENSG00000284727	AC116562.4	4	4048211	4107583	1.7775	1.85574e-42	1.67144e-44	0.691403	0.00231466	0.000425127
ENSG00000182287	AP1S2	X	15825806	15854931	0.568155	3.14545e-09	2.78499e-10	0.690888	9.23411e-10	2.62328e-11
ENSG00000171680	PLEKHG5	1	6466092	6520061	0.739648	3.20743e-14	1.56825e-15	0.689918	2.62504e-10	6.8342e-12
ENSG00000159792	PSKH1	16	67893254	67929676	0.649028	3.25402e-15	1.45757e-16	0.688307	1.98176e-08	7.59109e-10
ENSG00000158691	ZSCAN12	6	28378955	28399734	0.270617	0.0065352	0.00211901	0.688029	3.4294e-08	1.3976e-09
ENSG00000231295	AC004888.1	7	120746738	120752514	1.61743	4.40082e-24	9.41389e-26	0.686297	0.0157755	0.00432307
ENSG00000053438	NNAT	20	37521206	37523690	-0.325503	0.00471001	0.00145561	0.685081	4.63309e-05	4.42155e-06
ENSG00000250511	AC098798.1	4	110512488	110519505	0.7211	8.59478e-06	1.33674e-06	0.681937	0.000781762	0.00011624
ENSG00000163297	ANTXR2	4	79901146	80125454	0.504853	2.56762e-07	3.00846e-08	0.681544	1.30192e-05	1.06321e-06
ENSG00000145431	PDGFC	4	156760454	156971799	0.765354	5.31621e-08	5.63044e-09	0.681489	0.000358043	4.66079e-05
ENSG00000162757	C1orf74	1	209779208	209784559	0.493497	6.25084e-05	1.18532e-05	0.680748	0.000186926	2.15963e-05
ENSG00000182621	PLCB1	20	8077251	8968360	0.787308	1.86278e-11	1.26433e-12	0.680436	1.78764e-05	1.50231e-06
ENSG00000171574	ZNF584	19	58401504	58418327	0.374593	0.000741738	0.000181214	0.679669	1.49628e-05	1.23141e-06
ENSG00000136936	XPA	9	97674909	97697357	0.525403	8.93323e-05	1.75504e-05	0.679311	5.98246e-05	5.93253e-06
ENSG00000089050	RBBP9	20	18486540	18497225	0.434081	3.05957e-05	5.40561e-06	0.679049	1.31643e-10	3.18768e-12
ENSG00000099365	STX1B	16	30989256	31010638	0.834423	8.22674e-10	6.91351e-11	0.678825	0.00114166	0.000182493
ENSG00000170100	ZNF778	16	89217703	89237071	0.268388	0.00862816	0.00291977	0.67747	0.000142421	1.58684e-05
ENSG00000171130	ATP6V0E2	7	149872968	149891204	0.436991	0.0026508	0.000753137	0.676245	0.000616525	8.78659e-05
ENSG00000187837	H1-2	6	26055787	26056428	0.876286	4.34123e-30	6.66807e-32	0.672874	0.0195936	0.00562838
ENSG00000143457	GOLPH3L	1	150646230	150697154	0.580075	2.31469e-18	7.65047e-20	0.67189	1.22851e-09	3.57753e-11
ENSG00000145147	SLIT2	4	20251905	20620561	1.58909	4.18235e-30	6.3904e-32	0.67084	0.00073465	0.000108189
ENSG00000181350	LRRC75A	17	16441577	16492193	1.19889	8.84038e-15	4.15893e-16	0.6701	0.0483578	0.0174803
ENSG00000107331	ABCA2	9	137007234	137028922	0.847397	2.0597e-15	8.86158e-17	0.66923	2.86988e-05	2.55716e-06
ENSG00000140987	ZSCAN32	16	3382081	3401065	0.537167	2.43025e-12	1.47163e-13	0.668052	9.9233e-11	2.35577e-12
ENSG00000103199	ZNF500	16	4748239	4767624	0.352199	0.00541449	0.00170991	0.668001	9.21996e-06	7.1136e-07
ENSG00000214796	AC098934.1	1	202851828	202861620	0.580309	1.71249e-05	2.84106e-06	0.664793	0.0017264	0.000298958
ENSG00000149451	ADAM33	20	3667965	3682246	0.925096	2.81891e-11	1.97675e-12	0.66388	1.19605e-06	7.10798e-08
ENSG00000170525	PFKFB3	10	6144934	6254644	0.359368	0.0300474	0.0123113	0.662348	3.23712e-08	1.30387e-09
ENSG00000128606	LRRC17	7	102913000	102945111	-1.0196	6.08889e-06	9.20557e-07	0.661421	0.0425592	0.0148555
ENSG00000241015	TPM3P9	19	53431984	53444670	-0.706283	4.22762e-10	3.39638e-11	0.661122	0.00133095	0.000218438
ENSG00000155324	GRAMD2B	5	126360132	126496494	0.574106	9.74054e-06	1.53687e-06	0.660746	4.16684e-05	3.91723e-06
ENSG00000101152	DNAJC5	20	63895126	63936031	0.2659	0.00672535	0.00219527	0.659778	1.07246e-05	8.4527e-07
ENSG00000277072	STAG3L2	7	74843754	74890610	0.313986	0.0230602	0.00910538	0.659613	2.68482e-05	2.34977e-06
ENSG00000182636	NDN	15	23685400	23687305	0.443256	8.0368e-05	1.5647e-05	0.65956	4.08956e-05	3.84134e-06
ENSG00000151650	VENTX	10	133237855	133241928	0.472981	0.000555061	0.000130474	0.658296	7.30109e-05	7.44726e-06
ENSG00000067177	PHKA1	X	72578814	72714319	0.565843	7.54746e-11	5.60217e-12	0.657797	1.63656e-07	7.69262e-09
ENSG00000173546	CSPG4	15	75674322	75712848	0.578866	2.28665e-05	3.91131e-06	0.656553	0.000284432	3.54499e-05
ENSG00000125812	GZF1	20	23362182	23373062	0.260941	0.0468829	0.0205855	0.654932	0.00520099	0.0011314
ENSG00000116679	IVNS1ABP	1	185296388	185317273	0.958902	3.51785e-79	1.01844e-81	0.652371	1.33631e-11	2.60743e-13
ENSG00000135763	URB2	1	229626247	229660200	0.298043	0.00050758	0.000118333	0.652344	0.00610788	0.0013708
ENSG00000091972	CD200	3	112332347	112362812	0.466789	5.6283e-13	3.14117e-14	0.652254	3.17417e-10	8.33919e-12
ENSG00000177873	ZNF619	3	40477113	40491053	0.468125	2.19793e-05	3.73657e-06	0.650965	5.35772e-05	5.20212e-06
ENSG00000197857	ZNF44	19	12224686	12294887	-0.25711	0.00720794	0.00238004	0.648784	5.29028e-06	3.80957e-07
ENSG00000185585	OLFML2A	9	124777133	124814885	0.615932	4.84168e-23	1.07852e-24	0.648671	2.21347e-05	1.89345e-06
ENSG00000106077	ABHD11	7	73736094	73738867	0.807215	5.09739e-29	8.36242e-31	0.647637	2.27712e-10	5.85632e-12
ENSG00000185664	PMEL	12	55954105	55973317	1.62729	6.43448e-34	8.02046e-36	0.646511	0.0103041	0.00257337
ENSG00000167100	SAMD14	17	50110040	50129882	0.903335	2.05418e-11	1.4091e-12	0.646507	0.00743934	0.00174371
ENSG00000164128	NPY1R	4	163323962	163344832	1.26718	1.95257e-30	2.93631e-32	0.644163	0.0162632	0.00448296
ENSG00000173214	MFSD4B	6	111259327	111445354	1.30877	1.39719e-42	1.24719e-44	0.643743	1.16755e-05	9.31308e-07
ENSG00000181856	SLC2A4	17	7281718	7288257	0.82509	5.1606e-10	4.22061e-11	0.642335	0.000977232	0.000151414
ENSG00000167363	FN3K	17	82735615	82751196	0.552626	1.0155e-08	9.62831e-10	0.641938	2.02661e-07	9.81472e-09
ENSG00000166183	ASPG	14	104085686	104115582	0.609313	0.000391505	8.85647e-05	0.641071	0.000237352	2.85116e-05
ENSG00000133083	DCLK1	13	35768652	36131306	0.643594	0.000558473	0.000131366	0.640904	2.80977e-06	1.85213e-07
ENSG00000132688	NES	1	156668763	156677407	0.526382	1.28061e-20	3.47056e-22	0.640378	1.79546e-20	1.12243e-22
ENSG00000175161	CADM2	3	84958981	86074429	0.721786	1.03117e-05	1.63363e-06	0.63909	0.000429989	5.79466e-05
ENSG00000050344	NFE2L3	7	26152198	26187137	0.623582	6.8597e-19	2.11511e-20	0.636308	4.31577e-09	1.42755e-10
ENSG00000124217	MOCS3	20	50958818	50963929	0.360672	0.00219872	0.000607721	0.635945	7.32438e-05	7.47682e-06
ENSG00000117625	RCOR3	1	211258377	211316385	0.839934	4.00126e-10	3.20487e-11	0.634432	9.92491e-06	7.7439e-07
ENSG00000181773	GPR3	1	27392622	27395814	0.938465	1.76547e-12	1.04352e-13	0.634017	0.000949019	0.000146292
ENSG00000276043	UHRF1	19	4903080	4962154	0.357137	0.0147295	0.00541801	0.631153	0.00642945	0.00146037
ENSG00000178445	GLDC	9	6532464	6645783	0.617398	6.2678e-11	4.61705e-12	0.630232	1.92263e-05	1.62337e-06
ENSG00000212916	MAP10	1	232804892	232808407	0.711209	3.71749e-08	3.87146e-09	0.63011	0.00292976	0.000568471
ENSG00000144820	ADGRG7	3	100609601	100695479	-0.924167	1.12443e-06	1.46669e-07	0.627996	0.00021511	2.53631e-05
ENSG00000285756	BX890604.2	X	3817528	3937855	0.469537	1.44072e-08	1.39727e-09	0.626307	4.85295e-14	6.33644e-16
ENSG00000198846	TOX	8	58805412	59119147	0.622709	7.97553e-05	1.55021e-05	0.625987	0.049342	0.0178907
ENSG00000264247	LINC00909	18	74590317	74598885	0.28916	0.0341089	0.014258	0.625814	7.14282e-05	7.26887e-06
ENSG00000112877	CEP72	5	612340	667168	0.637076	3.00983e-07	3.55806e-08	0.625308	0.000365616	4.78664e-05
ENSG00000178814	OPLAH	8	144051266	144063965	0.512059	0.00473608	0.00146519	0.624173	0.00203467	0.000365973
ENSG00000106278	PTPRZ1	7	121873089	122062036	0.801463	2.48816e-09	2.17902e-10	0.623562	0.0054175	0.00118793
ENSG00000107731	UNC5B	10	71212570	71302864	0.720196	8.78102e-18	3.00115e-19	0.623234	1.51666e-09	4.56065e-11
ENSG00000225791	TRAM2-AS1	6	52576787	52643058	0.312216	0.0164493	0.00613658	0.62315	4.24717e-05	4.00284e-06
ENSG00000049239	H6PD	1	9234775	9271337	0.687837	2.66693e-26	5.14727e-28	0.621567	4.69609e-06	3.34825e-07
ENSG00000244026	FAM86DP	3	75421552	75435110	1.94191	2.40916e-99	5.03724e-102	0.621109	0.000487649	6.68207e-05
ENSG00000267886	AC074135.1	19	23075201	23100361	0.59912	5.55184e-11	4.0584e-12	0.620054	0.00385988	0.000792319
ENSG00000119888	EPCAM	2	47345158	47387601	0.351625	9.21508e-06	1.44951e-06	0.619953	3.85308e-10	1.03058e-11
ENSG00000006757	PNPLA4	X	7898247	7927739	0.274476	0.00274342	0.000783644	0.61913	3.75276e-07	1.93919e-08
ENSG00000182836	PLCXD3	5	41306952	41510628	-0.904147	3.55481e-07	4.28235e-08	0.618494	0.00107786	0.000170844
ENSG00000189046	ALKBH2	12	109088188	109093631	0.678987	3.5529e-10	2.82575e-11	0.617648	3.0223e-05	2.7121e-06
ENSG00000197363	ZNF517	8	144798876	144811169	0.39924	0.00327502	0.000957881	0.615988	0.000283779	3.53461e-05
ENSG00000173334	TRIB1	8	125430358	125438403	0.291133	0.00521172	0.00163959	0.615024	2.06711e-05	1.76008e-06
ENSG00000048405	ZNF800	7	127346790	127431924	0.312736	0.0125431	0.00447962	0.613794	0.00252363	0.000471296
ENSG00000171017	LRRC8E	19	7888505	7902021	0.373461	0.0121304	0.00431644	0.612754	0.000926684	0.000142336
ENSG00000117877	CD3EAP	19	45406209	45410766	0.395088	0.0037663	0.00112368	0.611964	0.0332352	0.0108724
ENSG00000136367	ZFHX2	14	23520857	23556192	0.343361	0.0346424	0.0145061	0.61169	0.00518117	0.00112395
ENSG00000059122	FLYWCH1	16	2911937	2951208	0.750437	2.37521e-08	2.37425e-09	0.611401	3.68583e-05	3.41545e-06
ENSG00000175283	DOLK	9	128945530	128947603	0.373035	0.0057887	0.00184391	0.611232	0.00754755	0.00177624
ENSG00000176749	CDK5R1	17	32486993	32491253	0.410072	0.000164254	3.41453e-05	0.610803	4.17367e-05	3.92695e-06
ENSG00000082146	STRADB	2	201387858	201480846	0.387934	5.33923e-06	7.94766e-07	0.609521	1.42674e-08	5.28381e-10
ENSG00000178184	PARD6G	18	80157232	80247514	0.275764	0.00168234	0.000449977	0.608898	5.16036e-09	1.71508e-10
ENSG00000071073	MGAT4A	2	98619106	98731132	0.763972	6.3513e-13	3.57021e-14	0.60884	0.0116992	0.00299863
ENSG00000182492	BGN	X	153494980	153509546	0.419354	0.01151	0.00406899	0.608061	0.00770995	0.00182545
ENSG00000142871	CCN1	1	85580761	85583950	0.721832	2.63439e-05	4.57179e-06	0.607778	0.000346283	4.48302e-05
ENSG00000212719	LINC02693	17	21428263	21574517	0.891788	1.19562e-36	1.38455e-38	0.607559	8.53931e-05	8.91975e-06
ENSG00000180628	PCGF5	10	91163012	91284337	0.437142	0.000651503	0.000156916	0.607099	0.00421976	0.000883251
ENSG00000196547	MAN2A2	15	90902218	90922584	0.330621	4.97028e-06	7.35737e-07	0.60518	1.86174e-09	5.7604e-11
ENSG00000147813	NAPRT	8	143574785	143578649	0.701206	3.57479e-05	6.42226e-06	0.60423	0.0010267	0.000160947
ENSG00000027847	B4GALT7	5	177600132	177610330	0.344295	0.00597066	0.00191196	0.603806	0.000738718	0.000108847
ENSG00000145423	SFRP2	4	153780591	153789083	0.905689	5.8549e-12	3.68668e-13	0.603014	3.76391e-05	3.49674e-06
ENSG00000162396	PARS2	1	54756898	54764523	0.272743	0.00509962	0.00159776	0.602649	1.40342e-07	6.47458e-09
ENSG00000110195	FOLR1	11	72189558	72196323	0.968087	8.03359e-20	2.32577e-21	0.602176	1.48776e-05	1.22322e-06
ENSG00000151693	ASAP2	2	9206765	9405683	0.34545	0.000274207	5.99352e-05	0.601289	6.95457e-05	7.04427e-06
ENSG00000137815	RTF1	15	41408408	41483563	0.466666	1.75194e-18	5.72917e-20	0.599436	2.77703e-24	1.20865e-26
ENSG00000198598	MMP17	12	131828393	131851783	0.509967	0.0166993	0.00624325	0.598633	0.0419334	0.0145806
ENSG00000124243	BCAS4	20	50794894	50882676	0.709034	8.37009e-15	3.91749e-16	0.595527	0.000423659	5.66913e-05
ENSG00000230487	PSMG3-AS1	7	1570073	1589626	0.684964	2.31192e-05	3.96382e-06	0.595477	0.00138407	0.000228798
ENSG00000132763	MMACHC	1	45500300	45513382	0.388227	0.000386485	8.72737e-05	0.593602	4.08956e-05	3.83524e-06
ENSG00000172350	ABCG4	11	119149052	119162653	2.48443	5.81622e-133	6.08049e-136	0.593594	0.000316468	4.04694e-05
ENSG00000106733	NMRK1	9	75060573	75088217	0.37665	1.33406e-06	1.76372e-07	0.59343	7.60099e-05	7.81933e-06
ENSG00000122008	POLK	5	75511756	75601144	0.522617	2.87233e-12	1.75781e-13	0.593337	1.11447e-05	8.83672e-07
ENSG00000185495	AC138393.1	1	223992743	224010612	0.58464	0.000311511	6.89413e-05	0.592926	0.00412723	0.000859281
ENSG00000099622	CIRBP	19	1259384	1274880	0.802411	1.26549e-26	2.32033e-28	0.58815	3.16583e-06	2.14446e-07
ENSG00000170899	GSTA4	6	52977948	52995304	0.74531	2.35293e-11	1.62349e-12	0.588047	0.0124516	0.00322203
ENSG00000269837	IPO5P1	19	23255053	23257939	0.480432	2.86083e-05	5.02686e-06	0.58794	2.12427e-07	1.03833e-08
ENSG00000198246	SLC29A3	10	71319259	71381423	0.416639	2.77919e-05	4.86223e-06	0.587274	7.16563e-06	5.35848e-07
ENSG00000160051	IQCC	1	32205661	32208687	0.546483	1.58669e-06	2.11559e-07	0.584755	0.000121003	1.32427e-05
ENSG00000132932	ATP8A2	13	25371974	26025851	-0.670112	1.10007e-18	3.46785e-20	0.584642	1.04748e-08	3.80464e-10
ENSG00000198824	CHAMP1	13	114314482	114337626	0.409647	5.38277e-13	2.99981e-14	0.583041	6.2211e-11	1.40303e-12
ENSG00000101246	ARFRP1	20	63698642	63708025	0.369745	0.00300277	0.000866663	0.582886	0.000427699	5.75623e-05
ENSG00000102935	ZNF423	16	49487524	49857919	0.523528	3.20053e-08	3.27645e-09	0.58262	7.56635e-05	7.7777e-06
ENSG00000178162	FAR2P2	2	130416755	130431363	0.674973	4.81318e-07	5.91051e-08	0.580605	0.00115908	0.00018601
ENSG00000204852	TCTN1	12	110614027	110649430	0.360941	0.00041344	9.42106e-05	0.580028	2.72689e-09	8.63143e-11
ENSG00000182473	EXOC7	17	76081016	76121576	0.293118	4.65634e-05	8.57126e-06	0.579746	2.95181e-06	1.97613e-07
ENSG00000143315	PIGM	1	160024953	160031990	0.366673	0.000725487	0.000176719	0.579301	3.54915e-06	2.43501e-07
ENSG00000174951	FUT1	19	48748011	48755390	0.469087	1.34337e-05	2.18105e-06	0.578826	7.08566e-06	5.28747e-07
ENSG00000131153	GINS2	16	85676198	85690073	0.268369	0.00710705	0.00234101	0.578554	0.000290169	3.63716e-05
ENSG00000169955	ZNF747	16	30530367	30535347	0.288438	0.00548639	0.0017357	0.577993	9.73927e-06	7.58363e-07
ENSG00000164458	TBXT	6	166157656	166168700	1.23112	1.11065e-20	2.99211e-22	0.576543	0.0034339	0.000684226
ENSG00000154743	TSEN2	3	12484432	12539623	0.457845	1.88454e-05	3.16439e-06	0.57596	0.000968732	0.00015002
ENSG00000084628	NKAIN1	1	31179745	31239887	0.553016	2.51019e-12	1.52811e-13	0.575513	1.67078e-07	7.86669e-09
ENSG00000210082	MT-RNR2	MT	1671	3229	0.575791	2.54531e-08	2.55861e-09	0.57517	8.90527e-06	6.84931e-07
ENSG00000100647	SUSD6	14	69611596	69715144	0.489134	2.77055e-06	3.89904e-07	0.575073	0.000989737	0.000153768
ENSG00000173846	PLK3	1	44800377	44805990	0.391055	0.00139694	0.000365888	0.57449	0.0309144	0.00991992
ENSG00000115738	ID2	2	8678845	8684461	2.26173	3.2926e-73	1.16505e-75	0.572045	0.00638207	0.00144843
ENSG00000181513	ACBD4	17	45132600	45144181	0.683351	9.0238e-11	6.75606e-12	0.571676	0.0116707	0.00298764
ENSG00000274471	AC242376.2	15	23309607	23314566	0.919835	3.91754e-08	4.08924e-09	0.571297	0.00300811	0.000586291
ENSG00000171811	CFAP46	10	132808392	132942823	0.339944	0.0223099	0.00876609	0.571087	8.75728e-06	6.70812e-07
ENSG00000105767	CADM4	19	43622368	43639850	0.629365	1.06256e-14	5.02439e-16	0.570493	1.17486e-06	6.97276e-08
ENSG00000250722	SELENOP	5	42799880	42887392	0.473371	0.00418985	0.00126993	0.569832	0.000349252	4.53527e-05
ENSG00000089060	SLC8B1	12	113298759	113359493	0.67175	6.78667e-10	5.64874e-11	0.569786	0.000150971	1.69883e-05
ENSG00000128590	DNAJB9	7	108569867	108574850	-0.30372	0.0226234	0.00891289	0.569337	0.0337165	0.0110893
ENSG00000134330	IAH1	2	9473658	9496543	0.562564	1.7358e-19	5.15085e-21	0.568898	3.21777e-08	1.29352e-09
ENSG00000164307	ERAP1	5	96760810	96808100	0.333448	2.98332e-05	5.26306e-06	0.568336	0.0004936	6.7808e-05
ENSG00000134461	ANKRD16	10	5861616	5889906	0.4351	0.000109618	2.19413e-05	0.567053	3.89885e-05	3.64061e-06
ENSG00000283103	AC010642.2	19	58309727	58327248	0.340651	0.00467606	0.00144174	0.566485	7.8987e-05	8.16935e-06
ENSG00000185019	UBOX5	20	3107573	3160196	0.588212	7.38658e-11	5.47682e-12	0.564052	1.94689e-06	1.23712e-07
ENSG00000203761	MSTO2P	1	155745829	155750137	0.637422	3.21473e-08	3.29723e-09	0.563374	0.00133412	0.000219064
ENSG00000100379	KCTD17	22	37051736	37063390	0.56016	1.35819e-07	1.53022e-08	0.563313	0.00423077	0.000886271
ENSG00000174327	SLC16A13	17	7036015	7040117	0.415714	0.00792553	0.00264312	0.561904	0.00665062	0.00152148
ENSG00000072195	SPEG	2	219434843	219493629	0.592171	4.83178e-08	5.09406e-09	0.560744	0.00171106	0.000295985
ENSG00000110092	CCND1	11	69641156	69654474	0.254796	0.0203026	0.00783064	0.559638	0.0124471	0.00321988
ENSG00000083093	PALB2	16	23603160	23641310	0.358501	6.18628e-06	9.36773e-07	0.558573	1.6564e-09	5.07261e-11
ENSG00000163866	SMIM12	1	34712737	34859755	0.281549	0.000463945	0.000107116	0.558139	3.08256e-05	2.7735e-06
ENSG00000184792	OSBP2	22	30693782	30907824	0.655739	8.6341e-07	1.11233e-07	0.556474	0.00748868	0.00175706
ENSG00000170382	LRRN2	1	204617170	204685738	0.466625	0.000233228	5.0153e-05	0.556399	0.00103888	0.000163185
ENSG00000157514	TSC22D3	X	107713221	107777342	0.339727	0.000547336	0.000128482	0.555243	0.00558658	0.00123297
ENSG00000108433	GOSR2	17	46923075	46975524	0.395298	1.08781e-09	9.20289e-11	0.554866	2.07849e-05	1.77142e-06
ENSG00000011422	PLAUR	19	43646095	43670547	0.59042	4.32693e-05	7.89529e-06	0.554666	0.0336542	0.0110467
ENSG00000164251	F2RL1	5	76818933	76835315	0.746043	7.18571e-15	3.31693e-16	0.554601	8.61334e-07	4.85658e-08
ENSG00000101417	PXMP4	20	33702758	33720319	0.411244	0.00851909	0.00287738	0.553671	0.00622961	0.00140545
ENSG00000167378	IRGQ	19	43584369	43596135	0.327329	0.00053985	0.000126464	0.553602	7.38676e-09	2.56611e-10
ENSG00000163013	FBXO41	2	73254682	73284431	0.555765	1.87166e-10	1.43742e-11	0.5528	3.85947e-06	2.6815e-07
ENSG00000179918	SEPHS2	16	30443631	30445874	0.336973	2.28018e-06	3.13925e-07	0.55201	2.8258e-07	1.40429e-08
ENSG00000143801	PSEN2	1	226870184	226896105	0.322231	0.00116917	0.000299932	0.55171	0.00835311	0.00200218
ENSG00000253953	PCDHGB4	5	141387698	141512979	-0.522874	0.000321734	7.15913e-05	0.550881	0.00275204	0.000525929
ENSG00000009950	MLXIPL	7	73593194	73624543	0.520167	2.94559e-05	5.19001e-06	0.550792	0.00358663	0.00072374
ENSG00000102931	ARL2BP	16	57245259	57253635	0.284024	1.81445e-05	3.02919e-06	0.550764	8.63321e-10	2.41842e-11
ENSG00000028203	VEZT	12	95217746	95302799	0.277576	0.000706776	0.000171706	0.548207	5.0801e-07	2.72959e-08
ENSG00000010539	ZNF200	16	3222325	3236221	0.250101	0.023872	0.00946625	0.548066	0.00582598	0.00129548
ENSG00000101412	E2F1	20	33675477	33686385	0.594487	5.90479e-08	6.30129e-09	0.546801	0.00103687	0.000162787
ENSG00000104738	MCM4	8	47960185	47978160	0.379131	3.43285e-05	6.13295e-06	0.546071	0.00163328	0.00027943
ENSG00000196912	ANKRD36B	2	97492663	97589965	1.21311	1.17264e-18	3.73435e-20	0.546063	0.00180229	0.000316474
ENSG00000112182	BACH2	6	89926528	90296908	-0.629323	1.84257e-08	1.80626e-09	0.545595	0.008516	0.00205066
ENSG00000186019	AC021092.1	19	44103007	44113183	-1.05577	2.86782e-11	2.01335e-12	0.544705	0.00766012	0.00181183
ENSG00000155657	TTN	2	178525989	178830802	0.816996	2.80322e-10	2.19794e-11	0.544557	0.000830162	0.000124488
ENSG00000153982	GDPD1	17	59220467	59275970	0.313711	0.0203026	0.0078337	0.54384	0.00147913	0.000248013
ENSG00000235217	TSPY26P	20	32186477	32190527	0.486126	4.22747e-06	6.17717e-07	0.543492	2.90845e-05	2.59383e-06
ENSG00000125457	MIF4GD	17	75266228	75271227	0.601292	3.62465e-10	2.88573e-11	0.543211	0.000164264	1.87701e-05
ENSG00000182108	DEXI	16	10928891	10942468	0.590372	3.56948e-12	2.21029e-13	0.542328	1.79816e-06	1.12554e-07
ENSG00000169618	PROKR1	2	68643589	68658247	0.266684	0.0131883	0.00475458	0.541575	0.00124529	0.000201521
ENSG00000157036	EXOG	3	38496127	38542161	0.5144	2.70699e-05	4.70727e-06	0.541351	0.000180958	2.08352e-05
ENSG00000204634	TBC1D8	2	101007617	101252866	0.608354	1.95069e-11	1.33026e-12	0.541033	4.77395e-06	3.41509e-07
ENSG00000103351	CLUAP1	16	3500976	3539048	0.727951	3.50504e-13	1.91389e-14	0.541	4.69609e-06	3.34825e-07
ENSG00000234787	LINC00458	13	54115783	54142319	-0.300192	0.00108881	0.000276866	0.540955	0.000167885	1.92502e-05
ENSG00000214357	NEURL1B	5	172641263	172691540	1.27216	2.68893e-64	1.05957e-66	0.540469	0.000102651	1.09255e-05
ENSG00000215417	MIR17HG	13	91347820	91354579	1.0001	2.21761e-15	9.63667e-17	0.53902	0.00176545	0.000308188
ENSG00000133619	KRBA1	7	149714781	149734575	0.493729	5.86678e-06	8.84617e-07	0.536315	0.000264258	3.23541e-05
ENSG00000015171	ZMYND11	10	134465	254637	0.389602	5.85265e-07	7.29523e-08	0.535996	8.92342e-09	3.16348e-10
ENSG00000205710	C17orf107	17	4899418	4902934	0.706138	0.00014437	2.97332e-05	0.53555	0.00484924	0.00103838
ENSG00000090776	EFNB1	X	68829021	68842160	0.392182	0.00864834	0.00292938	0.535515	0.0143134	0.00381592
ENSG00000188112	C6orf132	6	42101119	42142620	0.255632	0.0463804	0.0203262	0.535497	0.00132527	0.000216876
ENSG00000139370	SLC15A4	12	128793194	128823958	0.677186	8.15644e-07	1.04686e-07	0.534227	0.00304231	0.000594657
ENSG00000074211	PPP2R2C	4	6320578	6563600	0.773637	1.73926e-11	1.1735e-12	0.534206	0.0111434	0.00283502
ENSG00000155100	OTUD6B	8	91070196	91087095	0.282383	0.00266425	0.000757387	0.53407	6.97866e-05	7.0742e-06
ENSG00000163964	PIGX	3	196639775	196736007	0.352128	7.11086e-05	1.36213e-05	0.533507	8.20584e-08	3.65584e-09
ENSG00000181220	ZNF746	7	149472696	149497817	0.306101	0.0062775	0.0020188	0.533219	0.000616525	8.78376e-05
ENSG00000133983	COX16	14	70325081	70416984	0.41377	0.00140671	0.000368787	0.532593	0.00544414	0.00119507
ENSG00000165271	NOL6	9	33461353	33473930	0.42126	2.69119e-06	3.76571e-07	0.531745	0.0320071	0.0103769
ENSG00000204147	ASAH2B	10	50739318	50816495	0.647246	3.50908e-08	3.64312e-09	0.531576	0.00144152	0.000240869
ENSG00000158882	TOMM40L	1	161225939	161230746	0.283835	0.0153876	0.005691	0.531233	0.00070304	0.000102366
ENSG00000254685	FPGT	1	74198212	74234086	0.398982	0.00259762	0.000735939	0.530802	0.00210757	0.000380921
ENSG00000105737	GRIK5	19	41998321	42069498	0.863707	1.92865e-21	4.85458e-23	0.530408	0.00024153	2.91281e-05
ENSG00000136856	SLC2A8	9	127397138	127408424	0.449977	2.36485e-05	4.06409e-06	0.529163	0.00821755	0.00196514
ENSG00000135124	P2RX4	12	121209857	121234106	0.430461	7.71815e-06	1.18984e-06	0.528862	1.6314e-05	1.35423e-06
ENSG00000144580	CNOT9	2	218568580	218597080	0.315847	1.75069e-06	2.35678e-07	0.5278	4.0791e-06	2.84701e-07
ENSG00000236404	VLDLR-AS1	9	2421597	2643359	0.699925	2.49061e-12	1.5142e-13	0.527015	0.00757451	0.00178747
ENSG00000241859	ANOS2P	Y	13703902	13915824	0.439689	3.40381e-06	4.87236e-07	0.526175	1.97578e-06	1.25861e-07
ENSG00000147419	CCDC25	8	27733316	27772653	0.388886	1.41672e-09	1.20879e-10	0.525996	2.99712e-08	1.20245e-09
ENSG00000180185	FAHD1	16	1826941	1840207	0.451085	7.30298e-06	1.12232e-06	0.525714	0.000364609	4.76644e-05
ENSG00000005882	PDK2	17	50094737	50112152	0.406714	7.10401e-05	1.36024e-05	0.523874	0.00022472	2.67985e-05
ENSG00000172687	ZNF738	19	21358930	21379302	0.772767	1.26874e-20	3.42821e-22	0.523378	0.00100868	0.000157643
ENSG00000135956	TMEM127	2	96248516	96265994	0.272732	0.0217138	0.00848122	0.52326	0.00579783	0.00128647
ENSG00000144451	SPAG16	2	213284379	214410501	0.358375	3.59579e-06	5.16742e-07	0.522477	0.00270806	0.00051324
ENSG00000163481	RNF25	2	218663892	218672002	0.264139	0.0052007	0.00163528	0.522183	0.00919002	0.00224351
ENSG00000169255	B3GALNT1	3	161083883	161105411	0.408065	0.000351823	7.87676e-05	0.522143	0.000236793	2.84257e-05
ENSG00000239789	MRPS17	7	55951877	55956500	0.330501	0.0130773	0.00470337	0.521928	0.0162632	0.00448632
ENSG00000103707	MTFMT	15	65001512	65029639	0.336366	0.000499764	0.00011623	0.52186	9.32375e-06	7.20106e-07
ENSG00000181885	CLDN7	17	7259903	7263983	0.648699	1.83693e-24	3.88511e-26	0.521779	1.32775e-09	3.91906e-11
ENSG00000115884	SDC1	2	20200797	20225433	0.583006	5.41788e-06	8.0778e-07	0.521163	0.0100866	0.00250309
ENSG00000177932	ZNF354C	5	179060373	179083977	0.370518	4.83909e-06	7.15259e-07	0.521057	2.78595e-05	2.46167e-06
ENSG00000130590	SAMD10	20	63974116	63980008	0.549294	0.000603554	0.000143669	0.521053	0.0128937	0.0033609
ENSG00000225138	SLC9A3-AS1	5	473236	480884	1.21679	5.31412e-13	2.94873e-14	0.520497	9.63905e-05	1.01982e-05
ENSG00000122042	UBL3	13	29764371	29850617	0.594296	1.40801e-18	4.54051e-20	0.52018	6.72755e-10	1.84732e-11
ENSG00000166821	PEX11A	15	89677764	89690783	0.277122	0.0449974	0.0195948	0.520052	0.00546731	0.00120188
ENSG00000085721	RRN3	16	15060022	15094317	0.417595	2.19066e-06	2.99839e-07	0.519342	0.000115036	1.25168e-05
ENSG00000134508	CABLES1	18	23134564	23260467	0.940765	5.66703e-18	1.90952e-19	0.519187	0.00375297	0.000766512
ENSG00000174839	DENND6A	3	57625454	57693077	0.296615	0.000607744	0.000144862	0.519029	2.24888e-06	1.44681e-07
ENSG00000165449	SLC16A9	10	59650761	59736002	1.10223	4.0381e-30	6.13753e-32	0.517537	0.000927404	0.000142519
ENSG00000160190	SLC37A1	21	42496008	42581440	0.486641	1.43674e-06	1.90872e-07	0.517401	0.00369583	0.000752978
ENSG00000187764	SEMA4D	9	89360787	89498130	0.662411	1.24655e-21	3.09273e-23	0.516473	0.000150296	1.69004e-05
ENSG00000168675	LDLRAD4	18	13217498	13652755	1.04265	1.22438e-32	1.64432e-34	0.516087	1.74408e-05	1.45985e-06
ENSG00000149679	CABLES2	20	62388632	62407285	0.829492	9.0234e-34	1.13201e-35	0.514957	3.36658e-06	2.29909e-07
ENSG00000185684	EP400P1	12	132084283	132131639	0.424215	0.000543445	0.000127394	0.514828	0.000752147	0.000111123
ENSG00000145916	RMND5B	5	178130996	178150568	0.368945	9.93845e-06	1.57129e-06	0.514439	3.32849e-05	3.04219e-06
ENSG00000171161	ZNF672	1	248838210	248849517	0.417606	1.16644e-06	1.52711e-07	0.513875	1.00748e-06	5.76407e-08
ENSG00000253304	TMEM200B	1	29119429	29123903	0.338446	0.00178481	0.00048169	0.513636	7.47228e-09	2.60173e-10
ENSG00000176393	RNPEP	1	201982372	202006147	0.403459	8.3057e-15	3.88067e-16	0.512821	2.07976e-07	1.01215e-08
ENSG00000131669	NINJ1	9	93121496	93134251	0.413559	0.000559106	0.000131605	0.512523	0.000639482	9.16437e-05
ENSG00000171649	ZIK1	19	57578456	57593890	0.298528	1.48032e-07	1.67853e-08	0.512239	8.48778e-12	1.61199e-13
ENSG00000187189	TSPYL4	6	116249964	116254075	0.291781	0.000278924	6.1056e-05	0.511757	9.02385e-05	9.51157e-06
ENSG00000158246	TENT5B	1	27005020	27012850	0.406751	0.00132526	0.000345304	0.511305	0.000297561	3.75401e-05
ENSG00000275234	AC010503.5	19	6469465	6470152	0.361614	0.00500469	0.00156198	0.511294	0.00328217	0.000651396
ENSG00000143537	ADAM15	1	155050566	155062775	0.32849	0.00058143	0.000137748	0.510963	8.02365e-06	6.08901e-07
ENSG00000057657	PRDM1	6	105993463	106109939	0.427533	1.40587e-16	5.35891e-18	0.510039	1.87279e-08	7.11356e-10
ENSG00000168827	GFM1	3	158644278	158692575	0.473133	3.78118e-12	2.34746e-13	0.509744	5.44264e-05	5.3162e-06
ENSG00000095752	IL11	19	55364382	55370463	0.85124	1.85089e-11	1.25477e-12	0.509493	0.00163669	0.000280271
ENSG00000168077	SCARA3	8	27633868	27676776	0.554519	9.35757e-09	8.85714e-10	0.508476	0.00753432	0.00177134
ENSG00000189334	S100A14	1	153614255	153616986	-1.6358	2.10436e-31	2.99535e-33	0.508419	0.011001	0.00278748
ENSG00000090432	MUL1	1	20499448	20508151	0.839309	1.05358e-33	1.33869e-35	0.507547	1.2464e-05	1.01097e-06
ENSG00000170468	RIOX1	14	73490933	73493394	0.273583	0.0129987	0.00466324	0.505747	0.00208272	0.000375934
ENSG00000197037	ZSCAN25	7	99616946	99632408	0.280349	0.00027927	6.11541e-05	0.505167	0.00224045	0.000408722
ENSG00000156239	N6AMT1	21	28872191	28885371	0.387205	6.06088e-07	7.57427e-08	0.504456	7.55098e-05	7.74996e-06
ENSG00000153933	DGKE	17	56834107	56869567	0.466802	0.000144376	2.9746e-05	0.503566	0.00179503	0.00031449
ENSG00000171492	LRRC8D	1	89821014	89936611	0.306182	0.000263415	5.73434e-05	0.502991	0.000193928	2.25127e-05
ENSG00000175229	GAL3ST3	11	66040765	66049161	0.601652	0.000728684	0.000177556	0.502921	0.0473808	0.0170259
ENSG00000180543	TSPYL5	8	97273488	97277928	0.708834	6.71197e-21	1.78662e-22	0.502352	1.5751e-06	9.69714e-08
ENSG00000104626	ERI1	8	9002147	9116746	0.405606	0.000305972	6.74934e-05	0.501155	0.000180173	2.07305e-05
ENSG00000143079	CTTNBP2NL	1	112396214	112463456	0.306521	3.97684e-05	7.21172e-06	0.501015	1.85238e-06	1.16534e-07
ENSG00000106605	BLVRA	7	43758680	43807342	0.338988	3.53054e-05	6.32858e-06	0.499813	3.04376e-07	1.53187e-08
ENSG00000260261	AC124944.2	3	195913078	195954485	0.640292	1.45238e-05	2.37684e-06	0.498802	0.0210487	0.00618786
ENSG00000284428	AC092329.4	19	23259906	23274251	0.400598	0.0028676	0.000823592	0.498658	0.000775652	0.000114841
ENSG00000198231	DDX42	17	63773603	63819317	0.409372	3.96415e-13	2.17733e-14	0.498317	7.81831e-10	2.17158e-11
ENSG00000129354	AP1M2	19	10572671	10587315	0.468278	1.52715e-07	1.74146e-08	0.497949	0.000224723	2.68167e-05
ENSG00000233864	TTTY15	Y	14774265	14804162	0.43774	2.43831e-06	3.37657e-07	0.497665	3.9995e-07	2.07618e-08
ENSG00000211584	SLC48A1	12	47753916	47782751	0.71107	1.20949e-14	5.76779e-16	0.496846	9.69441e-06	7.53336e-07
ENSG00000088899	LZTS3	20	3162617	3173592	0.571753	2.34023e-15	1.02003e-16	0.49668	7.8205e-05	8.06801e-06
ENSG00000270696	AC005034.4	2	75660462	75662208	0.314923	0.00309697	0.000897336	0.496542	0.00311739	0.000613018
ENSG00000173320	STOX2	4	183797692	184023526	0.395324	7.0656e-08	7.61392e-09	0.496479	4.54948e-06	3.22211e-07
ENSG00000112379	ARFGEF3	6	138161939	138344663	0.325945	0.00153442	0.000406342	0.495853	0.00010793	1.15813e-05
ENSG00000196295	GARS-DT	7	30516309	30595286	0.441678	6.65346e-06	1.01414e-06	0.495844	0.000409203	5.45625e-05
ENSG00000223547	ZNF844	19	12064731	12081565	0.281901	0.00123712	0.000319851	0.495787	1.08069e-06	6.29413e-08
ENSG00000172613	RAD9A	11	67317871	67398410	0.458568	2.13604e-05	3.62448e-06	0.495307	0.000105217	1.12402e-05
ENSG00000164402	SEPTIN8	5	132750819	132807241	0.259449	2.56308e-07	3.00108e-08	0.493827	1.39007e-13	2.002e-15
ENSG00000130821	SLC6A8	X	153687926	153696588	0.309781	0.000178822	3.74042e-05	0.493119	7.13538e-08	3.13376e-09
ENSG00000134198	TSPAN2	1	115048011	115089503	0.695038	3.28636e-05	5.8433e-06	0.493083	0.0117914	0.00302692
ENSG00000164038	SLC9B2	4	103019868	103085829	0.737566	1.12274e-13	5.78751e-15	0.492928	0.0163303	0.00450914
ENSG00000164002	EXO5	1	40508741	40516556	0.331222	0.0040705	0.00122819	0.492507	0.00429798	0.000902993
ENSG00000070718	AP3M2	8	42152946	42171673	0.358706	3.22439e-07	3.82986e-08	0.492159	5.98246e-05	5.93654e-06
ENSG00000092421	SEMA6A	5	116443616	116574934	0.698163	2.49645e-21	6.35606e-23	0.49032	7.87267e-06	5.9682e-07
ENSG00000261801	LOXL1-AS1	15	73908071	73928248	0.811162	2.51142e-13	1.3471e-14	0.488879	0.00631	0.00143007
ENSG00000112419	PHACTR2	6	143536845	143831185	-0.511192	8.19937e-07	1.05303e-07	0.488255	0.000147207	1.64599e-05
ENSG00000131437	KIF3A	5	132692628	132737638	0.32196	2.46462e-06	3.41499e-07	0.488108	1.50706e-08	5.61706e-10
ENSG00000212747	RTL8B	X	135020513	135022542	0.892607	3.29186e-12	2.03309e-13	0.48789	0.0399176	0.013706
ENSG00000116285	ERRFI1	1	8004404	8026309	0.446818	2.38387e-15	1.04345e-16	0.485772	3.79851e-08	1.56605e-09
ENSG00000261824	LINC00662	19	27681072	27794005	0.312301	0.00979904	0.00338691	0.484665	5.84017e-05	5.77223e-06
ENSG00000034152	MAP2K3	17	21284672	21315232	0.434168	5.17486e-10	4.23643e-11	0.484444	1.35744e-08	5.00567e-10
ENSG00000167889	MGAT5B	17	76868456	76950393	1.00784	7.09127e-14	3.60409e-15	0.484346	0.00444179	0.000936372
ENSG00000168661	ZNF30	19	34926903	34945170	0.333853	0.0082237	0.00275843	0.484076	0.00410702	0.000853775
ENSG00000163001	CFAP36	2	55519604	55545879	0.440188	9.14427e-08	1.00524e-08	0.482888	1.34513e-06	8.1004e-08
ENSG00000162722	TRIM58	1	247857187	247880138	0.574272	6.77122e-06	1.03406e-06	0.48272	0.0150801	0.00407166
ENSG00000125375	DMAC2L	14	50312324	50335558	0.250745	0.0217455	0.0085035	0.481774	0.00012729	1.39911e-05
ENSG00000198774	RASSF9	12	85800703	85836409	1.0251	7.93475e-13	4.50498e-14	0.480436	0.0441907	0.0155578
ENSG00000072786	STK10	5	172042079	172188224	0.925865	6.31496e-20	1.81298e-21	0.480179	0.00115263	0.000184611
ENSG00000087301	TXNDC16	14	52430596	52552522	0.750661	7.1403e-17	2.65285e-18	0.480137	0.000198465	2.31021e-05
ENSG00000159166	LAD1	1	201380833	201399915	0.352426	0.00953209	0.00328018	0.480057	0.00700278	0.00161922
ENSG00000146205	ANO7	2	241188509	241225377	0.444148	0.000354167	7.93208e-05	0.479566	0.00553771	0.00121955
ENSG00000138792	ENPEP	4	110365733	110565285	0.953252	1.2209e-21	3.0142e-23	0.478131	0.0205554	0.00600704
ENSG00000102317	RBM3	X	48574449	48581162	0.402421	8.54897e-17	3.21747e-18	0.476879	2.89775e-07	1.44922e-08
ENSG00000198756	COLGALT2	1	183929854	184037729	0.616402	2.82061e-05	4.95166e-06	0.475262	0.0452499	0.0160684
ENSG00000137574	TGS1	8	55773446	55826445	0.322797	3.27742e-07	3.91656e-08	0.474636	1.42869e-07	6.63641e-09
ENSG00000196453	ZNF777	7	149431363	149461062	0.316968	0.00434225	0.00132217	0.474599	0.00756242	0.00178235
ENSG00000283526	PRRT1B	9	131545514	131558620	0.477431	0.000106036	2.11389e-05	0.474433	4.43064e-05	4.2038e-06
ENSG00000124532	MRS2	6	24402908	24426194	0.287395	4.96627e-07	6.11761e-08	0.473597	4.93401e-08	2.08496e-09
ENSG00000267909	CCDC177	14	69569799	69574871	0.724554	2.71442e-19	8.14217e-21	0.47341	2.98709e-05	2.67106e-06
ENSG00000112852	PCDHB2	5	141094606	141098703	0.388613	2.26866e-05	3.87505e-06	0.473207	0.00624267	0.00141037
ENSG00000174498	IGDCC3	15	65327127	65378002	0.473015	7.01628e-07	8.89801e-08	0.473185	0.000522598	7.26187e-05
ENSG00000130545	CRB3	19	6463777	6467221	0.303601	0.0246372	0.00981128	0.472245	0.00107615	0.000170312
ENSG00000048545	GUCA1A	6	42155406	42180049	0.601898	1.31692e-06	1.73894e-07	0.471775	0.00513665	0.0011109
ENSG00000076003	MCM6	2	135839626	135876443	0.250611	0.00103755	0.000262664	0.469899	3.60742e-09	1.1647e-10
ENSG00000141510	TP53	17	7661779	7687550	0.285957	2.61128e-05	4.52329e-06	0.469866	0.0010779	0.000170935
ENSG00000158301	GPRASP2	X	102712176	102717733	0.671931	1.62255e-17	5.75429e-19	0.4694	0.000656929	9.45599e-05
ENSG00000174871	CNIH2	11	66278175	66285301	0.45567	0.0140779	0.00513755	0.469393	0.0464839	0.016619
ENSG00000165948	IFI27L1	14	94081301	94103846	0.364772	0.00349776	0.00103318	0.469224	0.0068784	0.00158284
ENSG00000116885	OSCP1	1	36415827	36450451	0.436782	3.85358e-05	6.96959e-06	0.469188	0.0021796	0.000395836
ENSG00000047230	CTPS2	X	16587999	16712936	0.411868	2.02603e-11	1.38653e-12	0.468911	6.33417e-09	2.16536e-10
ENSG00000144647	POMGNT2	3	43079232	43106079	0.36581	0.00160141	0.000426012	0.467966	0.000936123	0.000144156
ENSG00000100211	CBY1	22	38656636	38673854	0.359772	6.32451e-07	7.94442e-08	0.467811	1.94632e-06	1.23287e-07
ENSG00000155729	KCTD18	2	200488958	200519784	0.442677	9.57066e-06	1.50852e-06	0.465905	0.00680735	0.0015632
ENSG00000160991	ORAI2	7	102433106	102456825	0.406966	1.20196e-05	1.9274e-06	0.465837	0.00341864	0.000680914
ENSG00000167657	DAPK3	19	3958453	3971123	0.445467	2.70699e-05	4.70866e-06	0.464368	0.00166	0.000285183
ENSG00000111319	SCNN1A	12	6346843	6377730	0.711341	1.15053e-21	2.82197e-23	0.462368	1.05164e-06	6.06668e-08
ENSG00000177842	ZNF620	3	40477131	40518736	0.29984	0.0238687	0.00946302	0.462051	0.00850068	0.00204563
ENSG00000205084	TMEM231	16	75536741	75556268	0.453843	2.71158e-06	3.80298e-07	0.461932	0.00529055	0.00115465
ENSG00000187097	ENTPD5	14	73958010	74019399	0.253108	0.000363268	8.15637e-05	0.461463	6.08522e-05	6.0536e-06
ENSG00000167280	ENGASE	17	79074939	79088599	0.530494	5.28308e-07	6.52578e-08	0.460925	0.00081554	0.000122037
ENSG00000163382	NAXE	1	156591762	156594299	0.294501	7.5486e-05	1.4563e-05	0.459846	4.72354e-07	2.50063e-08
ENSG00000152377	SPOCK1	5	136975298	137598379	1.22684	3.01103e-23	6.63469e-25	0.459775	0.0384801	0.0131058
ENSG00000152359	POC5	5	75674124	75717448	0.34637	0.00130108	0.000338375	0.459724	0.00474032	0.00101093
ENSG00000105011	ASF1B	19	14119512	14136613	0.341453	0.00041946	9.57995e-05	0.459093	0.0106316	0.00266947
ENSG00000106608	URGCP	7	43875894	43926411	0.374141	3.94829e-07	4.79447e-08	0.458393	0.000112419	1.21609e-05
ENSG00000121542	SEC22A	3	123201927	123274136	0.349174	6.43141e-05	1.22267e-05	0.458347	2.87021e-06	1.9056e-07
ENSG00000102225	CDK16	X	47217860	47229997	0.355398	4.05227e-11	2.91659e-12	0.457753	6.34663e-11	1.43637e-12
ENSG00000107815	TWNK	10	100987367	100994403	0.33476	0.000182777	3.8334e-05	0.45723	0.0186602	0.00531146
ENSG00000196372	ASB13	10	5638867	5666595	0.564756	2.42147e-11	1.68052e-12	0.456696	0.000182892	2.10723e-05
ENSG00000237517	DGCR5	22	18970514	18994628	0.909871	3.20488e-10	2.53349e-11	0.45538	0.0348468	0.011565
ENSG00000141698	NT5C3B	17	41825057	41836260	0.389337	4.68952e-11	3.39788e-12	0.455207	2.86447e-06	1.89913e-07
ENSG00000062038	CDH3	16	68636189	68722616	0.422013	1.18864e-15	4.9897e-17	0.454744	1.98376e-07	9.5758e-09
ENSG00000139505	MTMR6	13	25246201	25288009	0.404454	8.52243e-07	1.09657e-07	0.453819	0.000552483	7.74264e-05
ENSG00000215788	TNFRSF25	1	6460786	6466195	0.272318	0.0373162	0.0157787	0.453745	0.000189468	2.19199e-05
ENSG00000164338	UTP15	5	73565443	73583380	0.319501	0.000343854	7.69282e-05	0.453684	0.00915432	0.00223334
ENSG00000138614	INTS14	15	65578753	65611289	0.295009	0.000601527	0.000143041	0.453139	5.03506e-07	2.69344e-08
ENSG00000100299	ARSA	22	50622754	50628173	0.464208	0.00100233	0.000253342	0.453115	0.00801889	0.00191219
ENSG00000143390	RFX5	1	151340640	151347357	0.328442	1.93013e-05	3.25336e-06	0.45254	1.10142e-06	6.44102e-08
ENSG00000189241	TSPYL1	6	116267760	116279903	0.275039	4.41456e-06	6.46829e-07	0.450476	1.47669e-09	4.41599e-11
ENSG00000058085	LAMC2	1	183186238	183245127	0.431946	0.000202003	4.27399e-05	0.450163	0.0130164	0.00340113
ENSG00000171224	FAM241B	10	69630247	69633596	0.424158	7.67278e-06	1.18223e-06	0.44996	0.000517289	7.16762e-05
ENSG00000179476	C14orf28	14	44897275	44907257	0.317188	0.0464584	0.0203729	0.449754	0.0116605	0.00298409
ENSG00000160094	ZNF362	1	33256492	33300719	0.316595	0.0037988	0.00113521	0.448148	0.000953311	0.000147481
ENSG00000184922	FMNL1	17	45221444	45247319	0.595734	8.02293e-05	1.56136e-05	0.448133	0.0150902	0.00407794
ENSG00000205593	DENND6B	22	50309030	50327012	0.489059	0.000688718	0.000167042	0.448066	0.0142944	0.0038052
ENSG00000110074	FOXRED1	11	126269055	126278131	0.266222	0.000683229	0.000165601	0.44653	0.000269218	3.32342e-05
ENSG00000135842	NIBAN1	1	184790724	184974508	0.584238	1.79384e-05	2.99333e-06	0.445555	0.0133331	0.00349761
ENSG00000100151	PICK1	22	38056311	38075701	0.410598	2.07032e-06	2.81537e-07	0.44539	8.69403e-05	9.102e-06
ENSG00000157895	C12orf43	12	121000486	121016502	0.367354	2.89829e-06	4.10213e-07	0.445287	0.000288565	3.60919e-05
ENSG00000172575	RASGRP1	15	38488103	38565575	0.31297	0.00488125	0.001516	0.444349	0.0263843	0.00811968
ENSG00000073111	MCM2	3	127598410	127622436	0.253567	0.00726391	0.00240144	0.44404	0.0140016	0.00371176
ENSG00000101247	NDUFAF5	20	13785007	13821580	0.265698	0.0190889	0.00730705	0.443778	0.00145713	0.000243758
ENSG00000114279	FGF12	3	192139395	192767764	0.985439	2.38387e-15	1.0448e-16	0.442078	0.048971	0.017733
ENSG00000109016	DHRS7B	17	21123364	21193265	0.468256	3.79076e-07	4.59403e-08	0.440725	0.000344642	4.45905e-05
ENSG00000244462	RBM12	20	35648925	35664956	0.446402	7.12339e-07	9.05103e-08	0.440641	8.46218e-06	6.44859e-07
ENSG00000282826	FRG1CP	20	28563850	28602843	0.980636	3.53889e-25	7.20016e-27	0.440423	0.00124105	0.000200639
ENSG00000169895	SYAP1	X	16719612	16765340	0.287288	3.52597e-06	5.05856e-07	0.440388	3.19528e-05	2.89262e-06
ENSG00000141540	TTYH2	17	74213571	74262020	0.439355	0.00264622	0.000750987	0.440331	0.0423695	0.0147685
ENSG00000138162	TACC2	10	121989163	122254545	0.27249	0.00977059	0.00337472	0.44022	0.00415257	0.000865215
ENSG00000186814	ZSCAN30	18	35251058	35290245	0.304029	0.000208446	4.42036e-05	0.4398	0.000426126	5.72574e-05
ENSG00000102580	DNAJC3	13	95677139	95794988	-0.455454	1.7774e-12	1.05344e-13	0.439655	0.00231008	0.000424103
ENSG00000236144	TMEM147-AS1	19	35540738	35546029	0.428546	2.25962e-07	2.62578e-08	0.438926	6.71235e-06	4.97172e-07
ENSG00000108641	B9D1	17	19334308	19378193	0.562953	3.14971e-13	1.7072e-14	0.436822	0.00124446	0.000201287
ENSG00000174842	GLMN	1	92246402	92298987	-0.264591	0.012697	0.00454582	0.433915	0.0202091	0.00586106
ENSG00000152439	ZNF773	19	57499915	57518404	0.315564	0.00690535	0.00226013	0.433123	0.00420876	0.000880022
ENSG00000197451	HNRNPAB	5	178204533	178211163	0.331244	5.50957e-10	4.53261e-11	0.432047	0.000707517	0.000103353
ENSG00000166347	CYB5A	18	74250846	74291973	0.570357	4.32382e-12	2.69826e-13	0.432021	0.000984324	0.000152824
ENSG00000134986	NREP	5	111662621	111997464	0.299805	0.000613158	0.000146448	0.431639	0.00525286	0.00114393
ENSG00000088356	PDRG1	20	31944337	31952046	0.263275	0.00058878	0.000139631	0.43086	0.00348898	0.000699066
ENSG00000119431	HDHD3	9	113373419	113376999	0.401717	0.0016283	0.000433819	0.429948	0.0109123	0.00275622
ENSG00000086300	SNX10	7	26291895	26374329	0.500986	7.80205e-07	9.97609e-08	0.429367	0.00756784	0.00178521
ENSG00000155961	RAB39B	X	155258235	155264491	0.264916	0.0318813	0.0131551	0.429033	0.00360939	0.000730047
ENSG00000138640	FAM13A	4	88725955	89111398	0.394867	4.65335e-05	8.56133e-06	0.428899	0.000266716	3.27868e-05
ENSG00000163428	LRRC58	3	120324509	120349354	0.273593	0.000471757	0.000109185	0.428161	0.000264258	3.23919e-05
ENSG00000125817	CENPB	20	3783851	3786740	0.553395	9.7432e-07	1.26383e-07	0.426441	0.0258739	0.00793189
ENSG00000099953	MMP11	22	23768226	23784316	0.35191	0.026009	0.0104203	0.426044	0.0208299	0.00610392
ENSG00000118402	ELOVL4	6	79914814	79947553	0.440876	5.09006e-05	9.46789e-06	0.425628	0.0036473	0.000740889
ENSG00000166938	DIS3L	15	66293217	66333898	0.427683	5.52283e-07	6.84414e-08	0.425119	6.3994e-07	3.5043e-08
ENSG00000204531	POU5F1	6	31164337	31180731	0.510097	1.42889e-07	1.61332e-08	0.424238	0.00721031	0.00167691
ENSG00000132825	PPP1R3D	20	59936663	59940305	0.367911	0.00250375	0.000706123	0.422809	0.00549724	0.0012089
ENSG00000133256	PDE6B	4	625584	670782	0.32159	0.00633599	0.00204168	0.422584	0.00298448	0.000580742
ENSG00000150977	RILPL2	12	123410683	123436717	0.267294	0.0174698	0.00659174	0.421982	0.0107402	0.00270608
ENSG00000159445	THEM4	1	151870866	151909637	0.292435	0.00332084	0.000972352	0.421892	0.00073374	0.000107939
ENSG00000130307	USHBP1	19	17249171	17282786	0.760574	1.08457e-11	7.12578e-13	0.421871	0.00184605	0.00032562
ENSG00000185532	PRKG1	10	50990888	52298423	0.776239	4.6684e-09	4.21226e-10	0.421497	0.00265866	0.000502404
ENSG00000115318	LOXL3	2	74532258	74555690	0.626577	4.29197e-10	3.45843e-11	0.421214	0.00163328	0.000279419
ENSG00000162073	PAQR4	16	2969270	2973484	0.427855	0.000163856	3.40363e-05	0.420603	0.0102678	0.00256187
ENSG00000278318	ZNF229	19	44417519	44448578	0.455002	2.04196e-07	2.35971e-08	0.420559	0.00349704	0.000701235
ENSG00000135083	CCNJL	5	160249106	160345396	0.799167	4.40134e-24	9.45041e-26	0.419688	0.0005704	8.0525e-05
ENSG00000186222	BLOC1S4	4	6716174	6717664	0.392958	5.69425e-05	1.07291e-05	0.419338	0.00971899	0.00239295
ENSG00000164305	CASP3	4	184627696	184649509	0.648849	1.03197e-19	3.00422e-21	0.419096	0.00752805	0.00176819
ENSG00000096872	IFT74	9	26947039	27062930	0.45242	8.0192e-08	8.71891e-09	0.419085	0.00258313	0.000485474
ENSG00000137198	GMPR	6	16238587	16295549	0.599765	7.33461e-10	6.14019e-11	0.418659	0.00142246	0.000236833
ENSG00000154856	APCDD1	18	10454635	10489949	0.356397	2.73102e-05	4.76113e-06	0.418503	0.0255147	0.00780361
ENSG00000175782	SLC35E3	12	68746125	68793964	0.331351	0.000235243	5.0624e-05	0.41817	0.000186926	2.15945e-05
ENSG00000118242	MREG	2	215942584	216034096	0.261303	0.00151903	0.000401776	0.418097	0.000260525	3.18105e-05
ENSG00000176396	EID2	19	39538707	39540161	0.28402	0.000539652	0.000126375	0.416863	0.000366826	4.80703e-05
ENSG00000141349	G6PC3	17	44070735	44076344	0.354039	1.63505e-05	2.69682e-06	0.415794	0.000509491	7.03539e-05
ENSG00000080839	RBL1	20	36996349	37095997	0.277919	0.017531	0.00662048	0.414295	0.00493367	0.00105841
ENSG00000063180	CA11	19	48637946	48646187	0.574083	5.68998e-15	2.58531e-16	0.413689	0.00139142	0.000230123
ENSG00000157379	DHRS1	14	24290598	24299780	1.03685	1.0092e-34	1.20925e-36	0.412479	0.0300762	0.0095566
ENSG00000028310	BRD9	5	850291	892801	0.420622	5.19529e-09	4.73363e-10	0.412351	0.000953311	0.000147417
ENSG00000179409	GEMIN4	17	744421	753999	0.263573	0.000702896	0.000170651	0.412348	0.000741384	0.000109298
ENSG00000213079	SCAF8	6	154733325	154834244	0.272449	2.36719e-05	4.07e-06	0.410282	4.31264e-08	1.80191e-09
ENSG00000110315	RNF141	11	10511673	10541230	0.282437	0.000905862	0.000226484	0.410091	3.02045e-05	2.70806e-06
ENSG00000169122	FAM110B	8	57994509	58204279	0.474273	0.000214885	4.57592e-05	0.409818	0.00499539	0.001076
ENSG00000108179	PPIF	10	79347469	79355334	0.355702	1.57933e-09	1.3577e-10	0.409377	1.27977e-05	1.04209e-06
ENSG00000153896	ZNF599	19	34758073	34773229	0.377572	0.00480465	0.00148873	0.408764	0.00963913	0.00236993
ENSG00000099785	MARCHF2	19	8413270	8439017	0.391709	8.11752e-05	1.58303e-05	0.407634	0.00608727	0.00136465
ENSG00000013392	RWDD2A	6	83193357	83198935	0.271649	0.00944524	0.0032464	0.407563	0.000155752	1.76248e-05
ENSG00000110851	PRDM4	12	107732871	107761272	0.356024	8.44396e-05	1.6528e-05	0.406787	0.000157351	1.78304e-05
ENSG00000270170	NCBP2AS2	3	196942674	196943543	0.373298	7.90418e-06	1.2217e-06	0.406712	0.00267718	0.000506539
ENSG00000144306	SCRN3	2	174395730	174429575	-0.252394	0.0195632	0.00750277	0.405896	0.0118455	0.00304174
ENSG00000160588	MPZL3	11	118226690	118252365	0.469925	0.00122154	0.000315428	0.405483	0.0371215	0.0125197
ENSG00000205808	PLPP6	9	4662294	4665258	0.292933	0.00107149	0.000271772	0.405186	0.000953311	0.000147209
ENSG00000173786	CNP	17	41966763	41977740	0.297331	5.42476e-06	8.10115e-07	0.403702	2.55439e-05	2.21339e-06
ENSG00000178971	CTC1	17	8224815	8248056	0.395738	6.82896e-07	8.63849e-08	0.403366	5.44264e-05	5.31903e-06
ENSG00000070081	NUCB2	11	17208153	17349980	-0.488869	1.63675e-06	2.19023e-07	0.401905	0.000612957	8.72604e-05
ENSG00000116977	LGALS8	1	236518000	236552981	0.578869	1.00565e-07	1.11119e-08	0.399013	0.00115351	0.000184843
ENSG00000118898	PPL	16	4882507	4960741	0.318055	0.000116465	2.3471e-05	0.398582	0.00339277	0.000675225
ENSG00000141576	RNF157	17	76142465	76240493	0.625328	6.80524e-12	4.30698e-13	0.398453	0.00778269	0.00184513
ENSG00000186566	GPATCH8	17	44395281	44503430	0.278277	0.000103732	2.0588e-05	0.397609	8.31052e-07	4.65605e-08
ENSG00000162493	PDPN	1	13583465	13617957	0.40673	1.03783e-05	1.64668e-06	0.396292	0.00360921	0.000729154
ENSG00000280670	CCDC163	1	45493866	45500079	-0.822172	6.70492e-15	3.08421e-16	0.396218	0.00561003	0.00123858
ENSG00000100167	SEPTIN3	22	41969475	41998221	0.805752	5.3031e-19	1.61631e-20	0.396011	0.0461069	0.0164696
ENSG00000133805	AMPD3	11	10308313	10507579	0.44535	0.00152293	0.000402932	0.395793	0.00663386	0.00151607
ENSG00000054654	SYNE2	14	63761899	64226433	0.307606	9.83358e-05	1.94536e-05	0.393679	8.80688e-05	9.26196e-06
ENSG00000139318	DUSP6	12	89347235	89352501	0.916504	3.76928e-16	1.50347e-17	0.39289	0.0329629	0.0107572
ENSG00000180155	LYNX1	8	142771197	142777810	0.644848	9.99574e-18	3.44043e-19	0.392634	0.010483	0.00262468
ENSG00000090857	PDPR	16	70113626	70162537	0.992628	1.17366e-62	4.81358e-65	0.392334	2.87991e-06	1.91432e-07
ENSG00000122687	MRM2	7	2234195	2242205	0.28417	0.000826762	0.000205045	0.392298	0.00951045	0.00233603
ENSG00000146826	MAP11	7	100154420	100158723	0.333469	0.0108554	0.00381401	0.391933	0.0296391	0.00937229
ENSG00000100439	ABHD4	14	22598237	22613215	0.418665	1.17429e-13	6.09101e-15	0.391825	0.000203376	2.38025e-05
ENSG00000165804	ZNF219	14	21090077	21104722	0.672213	1.10375e-06	1.43616e-07	0.391176	0.0151184	0.00408916
ENSG00000005379	TSPOAP1	17	58301228	58328795	0.490584	7.25775e-05	1.39143e-05	0.390011	0.0116186	0.00297061
ENSG00000162909	CAPN2	1	223701593	223776018	0.572859	1.62376e-33	2.10234e-35	0.389978	4.18719e-09	1.37839e-10
ENSG00000135269	TES	7	116210506	116258783	0.283368	0.0036617	0.00108982	0.389847	3.32224e-05	3.03384e-06
ENSG00000099204	ABLIM1	10	114431113	114768061	0.593287	1.80255e-13	9.53821e-15	0.389373	0.000148807	1.67095e-05
ENSG00000134917	ADAMTS8	11	130404923	130428609	0.924781	3.96234e-08	4.13919e-09	0.389366	0.0405501	0.0139777
ENSG00000169418	NPR1	1	153678688	153693992	0.779302	1.04751e-21	2.56036e-23	0.388297	0.00024573	2.97124e-05
ENSG00000099864	PALM	19	708935	748329	0.357982	0.00507087	0.00158793	0.387772	0.0009576	0.000148221
ENSG00000109794	FAM149A	4	186104419	186172667	0.792227	4.80495e-14	2.38412e-15	0.387721	0.0184139	0.00521843
ENSG00000105281	SLC1A5	19	46774883	46788594	0.466077	0.00031911	7.09561e-05	0.387286	0.0449992	0.0159367
ENSG00000132600	PRMT7	16	68310974	68358563	0.414889	5.17917e-08	5.47697e-09	0.387283	0.000658319	9.4878e-05
ENSG00000121350	PYROXD1	12	21437615	21471250	0.331478	0.0341303	0.0142697	0.38715	0.0361609	0.0121304
ENSG00000135093	USP30	12	109023089	109088023	0.440745	3.0498e-07	3.61267e-08	0.387078	0.00852938	0.00205456
ENSG00000163697	APBB2	4	40810027	41216714	0.27489	4.55767e-08	4.80141e-09	0.386622	5.63024e-09	1.88462e-10
ENSG00000165152	PGAP4	9	101473170	101533537	0.785257	2.94277e-17	1.05547e-18	0.386349	0.00179529	0.000314677
ENSG00000228649	SNHG26	7	22854126	22872945	-0.383348	1.13257e-05	1.80792e-06	0.385433	0.00181766	0.000320036
ENSG00000169629	RGPD8	2	112368369	112434488	-0.250667	0.0405614	0.017389	0.385091	0.0315511	0.0101841
ENSG00000147439	BIN3	8	22620418	22669148	0.258699	0.000665574	0.000160626	0.384156	0.00157945	0.000268595
ENSG00000174165	ZDHHC24	11	66520637	66546235	0.445109	1.18739e-06	1.55645e-07	0.383697	0.0147311	0.00395362
ENSG00000256235	SMIM3	5	150777946	150796734	0.559946	4.61213e-09	4.15407e-10	0.382478	0.0194657	0.00558695
ENSG00000168936	TMEM129	4	1715952	1721358	0.503531	5.93563e-10	4.91175e-11	0.382269	0.000568093	8.01093e-05
ENSG00000089472	HEPH	X	66162549	66268867	0.606846	1.91363e-20	5.27846e-22	0.381947	0.0260657	0.00799896
ENSG00000132128	LRRC41	1	46261196	46303608	0.29669	6.78586e-08	7.2961e-09	0.381815	4.27944e-07	2.24182e-08
ENSG00000176974	SHMT1	17	18327860	18363563	0.250293	0.00095277	0.000239131	0.381776	0.00014448	1.61321e-05
ENSG00000257337	AC068888.1	12	53012884	53054450	0.499836	3.00416e-06	4.2568e-07	0.381041	0.0234294	0.00700639
ENSG00000119242	CCDC92	12	123918660	123972831	0.287602	0.00333084	0.000975813	0.380381	0.0120162	0.0030951
ENSG00000240445	FOXO3B	17	18667629	18682262	0.424656	0.000997403	0.000251857	0.380277	0.0237351	0.00712035
ENSG00000196584	XRCC2	7	152644776	152676141	0.264751	0.000715934	0.000174219	0.380217	0.000226195	2.7046e-05
ENSG00000167925	GHDC	17	42188799	42194532	0.484072	4.88187e-05	9.02175e-06	0.380193	0.0382388	0.0129995
ENSG00000150471	ADGRL3	4	61201258	62078335	0.438602	8.59478e-06	1.33606e-06	0.37932	0.00328271	0.000651762
ENSG00000124507	PACSIN1	6	34466061	34535229	0.529166	2.74532e-06	3.85692e-07	0.378782	0.00681632	0.00156586
ENSG00000243943	ZNF512	2	27582969	27623217	0.35158	1.99981e-05	3.38046e-06	0.378064	0.018009	0.00507743
ENSG00000161647	MPP3	17	43800799	43833170	0.452516	0.00019744	4.16314e-05	0.377823	0.044336	0.0156509
ENSG00000132475	H3-3B	17	75776434	75785893	0.2825	1.26164e-07	1.4123e-08	0.377723	2.91298e-08	1.15947e-09
ENSG00000132740	IGHMBP2	11	68903842	68940602	0.298746	0.00305514	0.000883497	0.376686	0.00167725	0.000288678
ENSG00000125449	ARMC7	17	75109952	75130272	0.479146	6.13221e-12	3.86622e-13	0.375329	0.0339161	0.0111852
ENSG00000178802	MPI	15	74890005	74902219	0.305066	3.77427e-05	6.81401e-06	0.374825	0.00311124	0.000611316
ENSG00000187801	ZFP69B	1	40450102	40463718	-0.350089	0.000987163	0.000248875	0.374576	0.0119467	0.00307152
ENSG00000166582	CENPV	17	16342534	16353656	0.26181	5.59851e-06	8.38314e-07	0.374371	2.56011e-05	2.22442e-06
ENSG00000177706	FAM20C	7	192571	260772	0.565914	6.85276e-10	5.71477e-11	0.374355	0.0132557	0.00347519
ENSG00000168818	STX18	4	4415742	4542346	0.410527	6.82083e-05	1.30273e-05	0.373152	0.011118	0.00282547
ENSG00000279672	AP006621.5	11	779617	780755	-0.484184	0.00180306	0.000487341	0.37263	0.0203825	0.00594038
ENSG00000151692	RNF144A	2	6917412	7068286	0.551479	2.49645e-21	6.36409e-23	0.372323	0.00276241	0.000528567
ENSG00000132286	TIMM10B	11	6481501	6484681	0.375906	1.50224e-08	1.45935e-09	0.370832	0.0153036	0.00415257
ENSG00000134072	CAMK1	3	9757347	9769992	0.340895	7.52092e-05	1.44854e-05	0.365424	0.00250355	0.000466675
ENSG00000102189	EEA1	12	92770637	92929331	-0.462868	1.70945e-08	1.67164e-09	0.364506	0.0185954	0.00529152
ENSG00000110583	NAA40	11	63938959	63957319	0.262732	0.000433536	9.93977e-05	0.363973	0.00123117	0.000198652
ENSG00000160703	NLRX1	11	119166568	119184016	0.497271	2.20099e-08	2.18241e-09	0.363524	0.0460247	0.016433
ENSG00000174365	SNHG11	20	38446343	38450940	0.297191	0.00141	0.000369765	0.363213	0.00286064	0.00055189
ENSG00000169213	RAB3B	1	51907956	51990700	0.320433	0.000299363	6.58911e-05	0.361995	0.0062622	0.00141577
ENSG00000163626	COX18	4	73052362	73069755	0.253709	0.0217489	0.00850719	0.361826	0.0067568	0.00154791
ENSG00000146576	C7orf26	7	6590021	6608726	0.262556	0.000551308	0.000129503	0.361606	0.00277506	0.000532066
ENSG00000186297	GABRA5	15	26866911	26949208	0.66774	1.54583e-11	1.03925e-12	0.36066	0.00854763	0.0020603
ENSG00000135119	RNFT2	12	116738178	116853631	0.264424	0.00169621	0.000454505	0.358372	0.00219085	0.000398572
ENSG00000183741	CBX6	22	38861422	38872249	0.307337	0.00272824	0.000778869	0.357056	0.0411679	0.014233
ENSG00000099889	ARVCF	22	19969896	20016823	0.265298	0.0420932	0.0181405	0.356993	0.026596	0.00819537
ENSG00000060982	BCAT1	12	24810024	24949101	0.299327	0.0201558	0.00777057	0.356022	7.39416e-05	7.55975e-06
ENSG00000175970	UNC119B	12	120710458	120723640	0.279544	1.38322e-08	1.33706e-09	0.356009	1.32052e-07	6.05897e-09
ENSG00000120162	MOB3B	9	27325209	27529814	0.32183	0.0135938	0.00493465	0.355825	0.0303009	0.00964871
ENSG00000000457	SCYL3	1	169849631	169894267	0.289959	0.0186451	0.00711317	0.355412	0.0206507	0.00604247
ENSG00000108370	RGS9	17	65100812	65227703	0.471756	7.09004e-08	7.64595e-09	0.354995	0.0376303	0.0127449
ENSG00000274211	SOCS7	17	38351844	38405593	-0.252148	0.00137305	0.00035908	0.353117	0.000288565	3.61021e-05
ENSG00000213190	MLLT11	1	151060397	151069544	0.323137	0.000211023	4.4835e-05	0.352961	0.00223579	0.000407279
ENSG00000136451	VEZF1	17	57971547	57988259	0.28045	3.69916e-08	3.84938e-09	0.352924	3.29002e-07	1.67404e-08
ENSG00000253873	PCDHGA11	5	141421047	141512975	0.284253	0.0432347	0.0187244	0.352779	0.0085553	0.00206283
ENSG00000114626	ABTB1	3	127672935	127680926	0.312494	0.0130489	0.0046889	0.352592	0.044072	0.0155068
ENSG00000147853	AK3	9	4709556	4742043	0.424246	3.35083e-10	2.65801e-11	0.352483	0.00179642	0.000315017
ENSG00000136807	CDK9	9	127785679	127790792	0.389091	5.13531e-08	5.42645e-09	0.351846	0.00084745	0.000127617
ENSG00000123130	ACOT9	X	23701055	23766475	0.301689	2.74855e-06	3.86366e-07	0.35162	0.000269451	3.32843e-05
ENSG00000173175	ADCY5	3	123282296	123449758	0.772146	1.23112e-19	3.61365e-21	0.350886	0.0261946	0.00804267
ENSG00000071242	RPS6KA2	6	166409364	166906451	0.45629	0.00165643	0.000442113	0.34998	0.00649273	0.00147662
ENSG00000159259	CHAF1B	21	36385392	36419015	0.279294	5.38153e-05	1.00966e-05	0.348785	0.00144034	0.000240266
ENSG00000007402	CACNA2D2	3	50362799	50504244	0.261466	0.000208978	4.43517e-05	0.34668	0.000129353	1.42589e-05
ENSG00000112081	SRSF3	6	36594353	36605600	0.271123	2.30975e-05	3.95639e-06	0.346425	0.00299272	0.000582819
ENSG00000234616	JRK	8	142657460	142681968	0.484017	1.40693e-11	9.41349e-13	0.345923	0.000824972	0.000123579
ENSG00000079337	RAPGEF3	12	47734363	47771040	1.03727	1.21503e-13	6.33164e-15	0.345594	0.0308658	0.00988234
ENSG00000198863	RUNDC1	17	42980565	42993690	0.286646	0.00848699	0.00286312	0.345003	0.000658255	9.48029e-05
ENSG00000160298	C21orf58	21	46300181	46323875	0.35496	0.00134895	0.000352127	0.344835	0.0441915	0.0155616
ENSG00000144057	ST6GAL2	2	106801600	106887108	0.39062	0.00066652	0.00016093	0.343558	0.0238191	0.00715684
ENSG00000128699	ORMDL1	2	189770267	189784364	0.399182	5.5437e-08	5.89367e-09	0.342688	0.000309849	3.93287e-05
ENSG00000140577	CRTC3	15	90529923	90645345	0.279503	2.37078e-06	3.27543e-07	0.342103	2.34676e-05	2.01676e-06
ENSG00000174238	PITPNA	17	1517718	1562792	0.283718	2.91854e-07	3.44311e-08	0.34202	8.41458e-05	8.76283e-06
ENSG00000143416	SELENBP1	1	151364304	151372707	0.472105	2.26026e-10	1.7504e-11	0.341944	0.0289927	0.00911285
ENSG00000133710	SPINK5	5	148025683	148137289	-0.448722	0.00099137	0.000250095	0.339127	0.0334404	0.0109474
ENSG00000164332	UBLCP1	5	159263290	159286036	0.287317	0.000216703	4.62509e-05	0.338851	0.0011471	0.000183635
ENSG00000270885	RASL10B	17	35731639	35743521	0.266787	0.0116494	0.0041239	0.338773	0.016033	0.00440757
ENSG00000171295	ZNF440	19	11814273	11835216	-0.257318	0.00930126	0.00318326	0.338555	0.0231818	0.00692867
ENSG00000184602	SNN	16	11668455	11679152	0.278932	4.61119e-06	6.77866e-07	0.337069	0.00207403	0.000373873
ENSG00000106610	STAG3L4	7	67302621	67362950	0.809338	5.80553e-27	1.04112e-28	0.334999	0.00466606	0.000990296
ENSG00000165195	PIGA	X	15319451	15335580	0.266118	0.00634775	0.00204598	0.334757	0.00704521	0.00162959
ENSG00000082397	EPB41L3	18	5392381	5630700	0.424926	1.86782e-09	1.61472e-10	0.3347	0.0125479	0.00324992
ENSG00000175707	KDF1	1	26949562	26960468	0.429978	1.15002e-06	1.50469e-07	0.333633	0.0351781	0.0117112
ENSG00000107021	TBC1D13	9	128787253	128810430	0.291045	4.4439e-06	6.51486e-07	0.333008	0.000195268	2.26837e-05
ENSG00000116353	MECR	1	29192657	29230942	0.554471	2.37196e-12	1.42871e-13	0.332128	0.000915826	0.000139943
ENSG00000162769	FLVCR1	1	212858275	212899363	-0.302312	7.0542e-07	8.95177e-08	0.331818	0.0143093	0.00381256
ENSG00000119682	AREL1	14	74653437	74713108	0.28881	1.9926e-05	3.36346e-06	0.329776	0.000102418	1.08926e-05
ENSG00000138650	PCDH10	4	133149294	133208606	0.62727	2.58562e-26	4.94876e-28	0.327893	0.0244765	0.00741443
ENSG00000185189	NRBP2	8	143833583	143840973	0.26755	0.00179003	0.000483243	0.326797	0.000297561	3.75652e-05
ENSG00000109956	B3GAT1	11	134378504	134412242	0.640957	2.03872e-13	1.08535e-14	0.322345	0.0428573	0.0149731
ENSG00000108821	COL1A1	17	50183289	50201632	0.543666	1.15002e-06	1.50378e-07	0.320582	0.0127597	0.00331588
ENSG00000130768	SMPDL3B	1	27935000	27959157	0.414634	0.000238135	5.1323e-05	0.32053	0.0264369	0.00813798
ENSG00000234444	ZNF736	7	64307459	64356634	0.317463	0.0030361	0.000877259	0.320272	0.0340359	0.0112501
ENSG00000107130	NCS1	9	130172404	130237303	0.284251	5.64147e-05	1.06206e-05	0.319557	0.000438295	5.917e-05
ENSG00000126217	MCF2L	13	112894378	113099742	0.591537	1.03891e-12	5.99036e-14	0.319243	0.0264598	0.0081471
ENSG00000170464	DNAJC18	5	139408588	139444491	0.328332	2.63264e-05	4.56662e-06	0.318885	0.000978275	0.000151731
ENSG00000004660	CAMKK1	17	3860315	3894891	0.471204	1.17647e-05	1.88463e-06	0.318879	0.0188953	0.00539632
ENSG00000165716	DIPK1B	9	136712572	136724742	0.336528	0.00126908	0.000329645	0.318876	0.0473884	0.0170324
ENSG00000275835	TUBGCP5	15	22983192	23039572	0.464772	1.44203e-06	1.91691e-07	0.318451	0.00908724	0.00221266
ENSG00000125247	TMTC4	13	100603927	100675093	0.581748	1.38509e-29	2.19431e-31	0.317721	0.00154777	0.000261494
ENSG00000015133	CCDC88C	14	91271323	91417844	0.426364	2.0831e-06	2.83443e-07	0.317017	0.00189252	0.000335462
ENSG00000255302	EID1	15	48878134	48880173	0.252726	2.7714e-05	4.83852e-06	0.315848	1.27765e-06	7.64344e-08
ENSG00000145439	CBR4	4	168863770	169010275	0.293313	0.000604777	0.000144057	0.314654	0.0058933	0.00131372
ENSG00000141376	BCAS3	17	60677453	61392838	0.382068	8.61882e-06	1.34255e-06	0.314189	0.0256873	0.00786249
ENSG00000251474	RPL32P3	3	129382922	129399655	0.390372	0.00031045	6.8681e-05	0.313627	0.00071646	0.000104943
ENSG00000174233	ADCY6	12	48766194	48789037	0.367055	2.01399e-07	2.32414e-08	0.312041	0.00198963	0.000355352
ENSG00000144730	IL17RD	3	57089982	57170306	0.250582	1.23066e-05	1.97737e-06	0.310279	0.000245032	2.96086e-05
ENSG00000181666	ZNF875	19	37312837	37369365	0.298427	1.90605e-05	3.2097e-06	0.310021	0.000952494	0.000146978
ENSG00000115183	TANC1	2	158968640	159232659	-0.34222	3.94669e-05	7.15069e-06	0.306509	0.00613511	0.00137976
ENSG00000122779	TRIM24	7	138460259	138589996	0.399716	1.17218e-14	5.57101e-16	0.304715	0.0209899	0.00616393
ENSG00000162512	SDC3	1	30869466	30908758	0.271553	1.1066e-05	1.76469e-06	0.303308	0.00051513	7.12549e-05
ENSG00000104299	INTS9	8	28767661	28890242	0.25387	0.00315656	0.000916381	0.302334	0.000439407	5.93549e-05
ENSG00000102181	CD99L2	X	150766336	150898816	0.273399	0.00120756	0.000311335	0.301201	0.00367565	0.000747812
ENSG00000170903	MSANTD4	11	105995623	106022403	0.285535	0.000115452	2.325e-05	0.300945	0.0152185	0.00411984
ENSG00000213064	SFT2D2	1	168225938	168253021	-0.310439	1.11692e-05	1.78205e-06	0.300537	0.00651708	0.00148371
ENSG00000255112	CHMP1B	18	11851413	11854444	0.274375	2.92705e-05	5.15264e-06	0.298987	0.00304179	0.0005943
ENSG00000100364	KIAA0930	22	45190338	45240769	0.291709	6.15889e-06	9.32129e-07	0.297164	0.000638918	9.15123e-05
ENSG00000164252	AGGF1	5	77029251	77065234	0.286301	0.00512944	0.00160958	0.29629	0.0237615	0.00713202
ENSG00000130024	PHF10	6	169703902	169725566	0.262134	0.000127889	2.60303e-05	0.295155	0.00491805	0.00105389
ENSG00000215012	RTL10	22	19846138	19854896	0.377041	3.4425e-08	3.56016e-09	0.294513	0.00127825	0.000207664
ENSG00000197860	SGTB	5	65665928	65723035	0.296333	4.73901e-05	8.73488e-06	0.294098	0.005462	0.00119985
ENSG00000166685	COG1	17	73192632	73208507	0.279292	0.000378184	8.53081e-05	0.29367	0.0016474	0.000282627
ENSG00000124688	MAD2L1BP	6	43629540	43640952	0.256006	0.00314569	0.000912971	0.293525	0.020999	0.00616825
ENSG00000089220	PEBP1	12	118136124	118145584	0.574369	1.00217e-45	7.8981e-48	0.293346	1.78786e-07	8.51701e-09
ENSG00000166484	MAPK7	17	19377721	19383544	0.300737	0.00602007	0.00192923	0.290533	0.0149808	0.00403772
ENSG00000100417	PMM1	22	41576900	41589871	0.327021	4.97028e-06	7.3585e-07	0.290529	0.0036183	0.000734426
ENSG00000008853	RHOBTB2	8	22987417	23020199	0.379523	4.33201e-07	5.27784e-08	0.28909	0.00280216	0.00053817
ENSG00000032742	IFT88	13	20567069	20691437	0.567907	1.77282e-08	1.73647e-09	0.28878	0.0340025	0.0112337
ENSG00000123562	MORF4L2	X	103675496	103688158	0.355321	2.59491e-10	2.02418e-11	0.288504	2.84567e-06	1.87925e-07
ENSG00000173349	SFT2D3	2	127701497	127705242	0.423485	9.78227e-06	1.54581e-06	0.288468	0.0203716	0.0059356
ENSG00000143811	PYCR2	1	225919877	225924340	0.378651	6.78699e-09	6.25483e-10	0.287902	0.0102255	0.00254647
ENSG00000135148	TRAFD1	12	112125538	112153604	0.254246	4.63606e-05	8.52275e-06	0.286316	0.00468052	0.000994476
ENSG00000172785	CBWD1	9	121038	179147	0.252263	0.0179669	0.00681976	0.286246	0.0324638	0.0105712
ENSG00000170365	SMAD1	4	145481194	145559176	0.253303	0.0064672	0.00209124	0.285135	0.0128903	0.00335901
ENSG00000164985	PSIP1	9	15464066	15510995	0.512546	1.75965e-16	6.82067e-18	0.284939	0.00361247	0.000732689
ENSG00000180346	TIGD2	4	89111500	89114899	0.33864	0.00079275	0.00019559	0.284618	0.0398972	0.0136927
ENSG00000243836	WDR86-AS1	7	151409161	151413354	-0.324927	0.00174584	0.000469489	0.282145	0.028291	0.00884303
ENSG00000256771	ZNF253	19	19865882	19894674	-0.266344	0.000633143	0.000151781	0.282073	0.00910763	0.00221979
ENSG00000003147	ICA1	7	8113184	8262687	0.566665	1.40938e-10	1.07333e-11	0.281829	0.0426957	0.0149065
ENSG00000182307	C8orf33	8	145052465	145066685	0.262333	0.000229574	4.93118e-05	0.280897	0.00129573	0.000211119
ENSG00000135931	ARMC9	2	231198546	231374837	0.26043	5.63261e-06	8.45684e-07	0.280509	0.000552483	7.74709e-05
ENSG00000149483	TMEM138	11	61362344	61369509	0.359104	4.9563e-05	9.18719e-06	0.279849	0.0218529	0.00646059
ENSG00000164930	FZD6	8	103298433	103332866	0.593747	3.9526e-12	2.46342e-13	0.279617	0.0150351	0.00405711
ENSG00000122786	CALD1	7	134744252	134970729	0.278999	0.00452988	0.00139047	0.278548	0.0217287	0.00641528
ENSG00000162735	PEX19	1	160276812	160286348	0.301449	2.10328e-08	2.07706e-09	0.278343	2.99614e-05	2.68388e-06
ENSG00000076321	KLHL20	1	173714941	173786692	0.459648	0.00332706	0.00097444	0.277866	0.0129352	0.00337582
ENSG00000249790	AC092490.1	12	8788253	8795789	0.380853	1.13236e-10	8.57808e-12	0.277701	0.00261898	0.000492626
ENSG00000111906	HDDC2	6	125219962	125302078	0.33599	6.84806e-09	6.31663e-10	0.277218	0.0012476	0.000201993
ENSG00000165863	C10orf82	10	116663696	116670264	0.501654	1.6193e-15	6.88871e-17	0.276814	0.028213	0.0088075
ENSG00000118579	MED28	4	17614641	17634105	0.268059	3.55972e-07	4.29623e-08	0.276749	0.00174444	0.000303279
ENSG00000158483	FAM86C1	11	71787510	71801237	0.335209	0.000178822	3.74181e-05	0.276682	0.0454345	0.0161611
ENSG00000139826	ABHD13	13	108218392	108234243	0.281118	0.00229719	0.000639002	0.276539	0.0152919	0.00414819
ENSG00000132467	UTP3	4	70688532	70690551	0.255775	2.23627e-05	3.81254e-06	0.274438	0.0125036	0.00323745
ENSG00000177119	ANO6	12	45215987	45440404	0.457285	1.55056e-19	4.56377e-21	0.273464	0.0229238	0.00683706
ENSG00000179889	PDXDC1	16	14974591	15139339	0.291662	2.17389e-09	1.89331e-10	0.272315	0.000442957	5.99045e-05
ENSG00000004399	PLXND1	3	129555175	129606818	0.348764	1.57873e-05	2.59757e-06	0.27203	0.00557353	0.00122964
ENSG00000172939	OXSR1	3	38165089	38255484	0.305278	3.2312e-07	3.84539e-08	0.271996	0.00138124	0.000228122
ENSG00000165246	NLGN4Y	Y	14522573	14845650	0.268202	5.36014e-05	1.00478e-05	0.271873	0.00608727	0.00136466
ENSG00000130147	SH3BP4	2	234952017	235055714	0.253762	1.5404e-06	2.05015e-07	0.271793	0.00104724	0.000164996
ENSG00000107443	CCNJ	10	96043394	96060870	0.358877	2.64479e-06	3.69653e-07	0.270111	0.0210023	0.0061709
ENSG00000145247	OCIAD2	4	48885019	48906937	0.415163	1.00543e-08	9.52473e-10	0.270053	0.0286185	0.00897484
ENSG00000239521	CASTOR3	7	100200653	100272232	0.309698	1.89017e-05	3.17537e-06	0.266861	0.000511476	7.07089e-05
ENSG00000137944	KYAT3	1	88935773	88992953	0.415623	8.88783e-09	8.3625e-10	0.266741	0.00511664	0.00110576
ENSG00000067836	ROGDI	16	4796968	4802950	0.263632	0.0085103	0.00287235	0.266209	0.0306171	0.00978444
ENSG00000120889	TNFRSF10B	8	23020133	23069031	0.280406	7.07513e-09	6.54314e-10	0.266166	0.00311898	0.000613579
ENSG00000159479	MED8	1	43383917	43389808	0.351481	2.50266e-07	2.92631e-08	0.265906	0.0421224	0.0146629
ENSG00000163683	SMIM14	4	39546336	39638902	0.250034	0.000954156	0.000239556	0.265893	0.02678	0.00826266
ENSG00000116199	FAM20B	1	179025804	179076567	0.328591	4.7021e-09	4.24645e-10	0.265783	0.0331215	0.0108161
ENSG00000185127	C6orf120	6	169702190	169704856	0.390467	6.92162e-09	6.39117e-10	0.2657	0.0058066	0.00128909
ENSG00000215908	CROCCP2	1	16618253	16657232	-0.474208	0.00119725	0.00030829	0.265565	0.0171052	0.00476565
ENSG00000196586	MYO6	6	75749192	75919537	0.263593	0.0002787	6.09845e-05	0.265004	0.0379455	0.0128697
ENSG00000101138	CSTF1	20	56392371	56406362	0.311025	2.89799e-06	4.09937e-07	0.261829	0.00265701	0.000501672
ENSG00000165533	TTC8	14	88824153	88881078	0.512901	2.33158e-10	1.81126e-11	0.260461	0.0470353	0.0168645
ENSG00000114446	IFT57	3	108160812	108222435	0.30228	3.24701e-05	5.76811e-06	0.259466	0.0122344	0.00315711
ENSG00000143420	ENSA	1	150600851	150629612	0.28656	2.70507e-10	2.11881e-11	0.258399	0.00367461	0.00074731
ENSG00000181467	RAP2B	3	153162226	153170627	0.398264	9.35713e-10	7.88603e-11	0.257608	0.0270556	0.00836911
ENSG00000105419	MEIS3	19	47403124	47419527	0.487391	4.26189e-13	2.34772e-14	0.256728	0.00136829	0.00022554
ENSG00000157557	ETS2	21	38805183	38824955	0.362546	1.10551e-15	4.62296e-17	0.255304	0.000312488	3.98121e-05
ENSG00000181264	TLCD5	11	120325129	120333682	0.293044	0.000306588	6.76787e-05	0.253734	0.036803	0.0123977
ENSG00000258498	DIO3OS	14	101552221	101560431	0.384643	1.33252e-05	2.16113e-06	0.251528	0.0302164	0.00961464
ENSG00000170837	GPR27	3	71753855	71756496	0.461058	3.86757e-09	3.45235e-10	0.251435	0.0386556	0.0131748
ENSG00000141013	GAS8	16	90019629	90044975	0.332052	6.77218e-06	1.03475e-06	0.251105	0.00382596	0.000784447
ENSG00000165821	SALL2	14	21521080	21537216	0.537639	9.76441e-34	1.23282e-35	0.250199	0.00435296	0.00091652
ENSG00000196712	NF1	17	31094927	31382116	-0.252492	0.00239958	0.000671535	-0.250066	0.0161369	0.00443998
ENSG00000101782	RIOK3	18	23453287	23486603	-0.275497	2.70263e-06	3.78824e-07	-0.250777	0.00200928	0.000359975
ENSG00000165264	NDUFB6	9	32553001	32573184	-0.266691	0.00613819	0.00197153	-0.250971	0.0382013	0.012971
ENSG00000109971	HSPA8	11	123057489	123063230	-0.357187	1.03384e-10	7.78361e-12	-0.252961	0.00694185	0.00160184
ENSG00000091879	ANGPT2	8	6499651	6563409	-0.615341	1.33111e-17	4.64576e-19	-0.254867	0.026188	0.00803855
ENSG00000196208	GREB1	2	11482341	11642788	-0.401754	5.1153e-11	3.72284e-12	-0.258034	9.76732e-05	1.03493e-05
ENSG00000104936	DMPK	19	45769717	45782552	-0.278523	0.0315866	0.0130233	-0.258183	0.0310111	0.00995831
ENSG00000147155	EBP	X	48521799	48528716	-0.274444	3.08854e-08	3.14691e-09	-0.258322	5.58873e-05	5.4795e-06
ENSG00000149089	APIP	11	34853094	34916379	-0.314164	7.52167e-06	1.15834e-06	-0.258349	0.0219741	0.00650323
ENSG00000137955	RABGGTB	1	75786197	75795086	-0.398362	2.12165e-15	9.17932e-17	-0.258358	0.00822953	0.00196931
ENSG00000111011	RSRC2	12	122503454	122527000	-0.342729	2.29244e-07	2.66944e-08	-0.258857	0.0158763	0.00435851
ENSG00000130164	LDLR	19	11089462	11133820	-0.536457	7.76515e-18	2.64146e-19	-0.259927	0.011118	0.00282592
ENSG00000188997	KCTD21	11	78171249	78188626	-0.475911	6.90523e-08	7.43554e-09	-0.260306	0.0393956	0.01348
ENSG00000156860	FBRS	16	30658431	30670810	-0.330647	0.00117967	0.000303194	-0.260495	0.0352695	0.01175
ENSG00000119787	ATL2	2	38293954	38377285	-0.337857	3.25902e-07	3.88409e-08	-0.260589	0.0034398	0.000685946
ENSG00000161249	DMKN	19	35497220	35513658	-0.269018	0.000308	6.80646e-05	-0.261437	0.000997456	0.000155337
ENSG00000148737	TCF7L2	10	112950247	113167678	-0.287599	9.56291e-05	1.8872e-05	-0.262842	0.00111796	0.000177995
ENSG00000186260	MRTFB	16	14071321	14266773	-0.445485	4.63554e-10	3.76137e-11	-0.263625	0.030905	0.00991444
ENSG00000272333	KMT2B	19	35717973	35738878	-0.292955	0.0108205	0.0037974	-0.263917	0.0144626	0.00386715
ENSG00000137285	TUBB2B	6	3224277	3231730	0.310246	1.37544e-05	2.24096e-06	-0.264387	0.0373995	0.0126432
ENSG00000234741	GAS5	1	173858559	173868882	-0.301354	0.0175973	0.00664693	-0.264811	0.00971899	0.00239341
ENSG00000046889	PREX2	8	67952046	68237032	-0.427787	1.15002e-06	1.50378e-07	-0.265011	0.00638074	0.00144762
ENSG00000060138	YBX3	12	10699089	10723323	-0.289194	1.86688e-10	1.43225e-11	-0.265926	0.00147852	0.00024757
ENSG00000182054	IDH2	15	90083045	90102504	0.283337	4.06344e-05	7.37856e-06	-0.268055	0.0314309	0.0101352
ENSG00000104413	ESRP1	8	94641074	94707466	-0.28966	8.42853e-08	9.20462e-09	-0.268328	0.000809772	0.00012111
ENSG00000171723	GPHN	14	66507407	67181803	-0.305524	0.000311511	6.89659e-05	-0.26853	0.016805	0.00467434
ENSG00000165030	NFIL3	9	91409045	91423832	-0.494026	3.34335e-05	5.95538e-06	-0.268744	0.0363757	0.0122337
ENSG00000103540	CCP110	16	19523811	19553408	-0.334757	7.95691e-09	7.40981e-10	-0.269895	0.00144105	0.000240497
ENSG00000185619	PCGF3	4	705748	770640	-0.660894	5.37346e-31	7.77824e-33	-0.270395	0.00175994	0.00030681
ENSG00000119655	NPC2	14	74476192	74494177	-0.41591	6.11902e-11	4.49762e-12	-0.271272	0.00024979	3.02824e-05
ENSG00000196247	ZNF107	7	64666083	64711582	-0.435695	1.28212e-12	7.43393e-14	-0.273956	0.00288875	0.000559372
ENSG00000116898	MRPS15	1	36455718	36464384	-0.257387	2.81208e-07	3.31072e-08	-0.274076	0.000493694	6.786e-05
ENSG00000100916	BRMS1L	14	35826338	35932325	-0.3022	0.000107165	2.14244e-05	-0.274086	0.0262758	0.00807591
ENSG00000108861	DUSP3	17	43766125	43778977	-0.309202	1.76225e-05	2.9378e-06	-0.274536	0.000392868	5.21358e-05
ENSG00000143776	CDC42BPA	1	226989865	227318474	-0.290142	5.60682e-05	1.05418e-05	-0.27458	0.00180362	0.000317278
ENSG00000139132	FGD4	12	32399529	32646050	-0.583985	2.95205e-21	7.64424e-23	-0.276121	0.0385617	0.0131373
ENSG00000106443	PHF14	7	10973336	11169630	-0.337452	4.74983e-09	4.2972e-10	-0.276514	0.000684844	9.95536e-05
ENSG00000226950	DANCR	4	52712404	52720351	-0.563827	1.14368e-13	5.90464e-15	-0.277947	0.0335451	0.010995
ENSG00000188186	LAMTOR4	7	100148907	100155944	-0.279859	4.83639e-05	8.9269e-06	-0.278665	0.0246909	0.00749501
ENSG00000087206	UIMC1	5	176905005	177022633	-0.353551	8.12824e-10	6.81766e-11	-0.279157	0.00130144	0.000212358
ENSG00000166398	KIAA0355	19	34254552	34355571	-0.343103	3.43322e-08	3.5478e-09	-0.279351	0.0028679	0.000553745
ENSG00000107968	MAP3K8	10	30434021	30461833	-0.408936	5.87545e-06	8.86396e-07	-0.280169	0.0225926	0.00672728
ENSG00000067646	ZFY	Y	2935281	2982506	-0.314024	3.33991e-05	5.94657e-06	-0.280927	0.00989131	0.00244602
ENSG00000198690	FAN1	15	30890559	30943108	-0.299892	0.00323318	0.000943044	-0.281341	0.0299208	0.00949452
ENSG00000126070	AGO3	1	35930718	36072500	-0.387406	3.25447e-09	2.88414e-10	-0.281375	0.0113519	0.00289433
ENSG00000173575	CHD2	15	92900189	93027996	-0.297586	5.31449e-06	7.90229e-07	-0.282627	0.0138332	0.00365728
ENSG00000076650	GPATCH1	19	33080899	33130542	-0.322386	2.17293e-05	3.68883e-06	-0.283981	0.0112366	0.00286138
ENSG00000198453	ZNF568	19	36916329	36998700	-0.733949	5.62533e-16	2.27999e-17	-0.283994	0.0477055	0.0171728
ENSG00000070018	LRP6	12	12116025	12267044	-0.571612	1.82739e-17	6.51011e-19	-0.284634	0.00174621	0.000303863
ENSG00000144354	CDCA7	2	173354820	173368997	-0.369296	4.65288e-12	2.91109e-13	-0.285081	0.00533681	0.0011677
ENSG00000080824	HSP90AA1	14	102080738	102139699	-0.542199	1.67624e-16	6.47042e-18	-0.28549	0.0002409	2.90331e-05
ENSG00000160551	TAOK1	17	29390464	29551904	-0.306415	2.61398e-07	3.06909e-08	-0.286236	0.000449413	6.08843e-05
ENSG00000135537	AFG1L	6	108294991	108526796	-0.401318	2.41524e-05	4.15651e-06	-0.287759	0.0167695	0.0046618
ENSG00000012211	PRICKLE3	X	49174802	49186528	-0.354734	0.0104212	0.00363381	-0.29144	0.0418037	0.0145186
ENSG00000130635	COL5A1	9	134641803	134844843	-0.465557	1.34896e-06	1.78559e-07	-0.292245	0.0205351	0.00599786
ENSG00000103126	AXIN1	16	287440	352723	-0.361913	8.0632e-05	1.57114e-05	-0.292619	0.00234245	0.000431338
ENSG00000085231	AK6	5	69350984	69370013	-0.259892	0.0211124	0.00820219	-0.294228	0.0400441	0.0137635
ENSG00000116539	ASH1L	1	155335268	155562807	-0.311603	9.57343e-05	1.89059e-05	-0.294672	0.0247491	0.00752247
ENSG00000105771	SMG9	19	43727983	43754962	-0.306978	6.61698e-06	1.00731e-06	-0.296944	0.00190601	0.000338187
ENSG00000115020	PIKFYVE	2	208266255	208358746	-0.253353	0.00253726	0.000717503	-0.297824	0.00539557	0.00118099
ENSG00000143499	SMYD2	1	214281102	214337131	-0.493809	4.53473e-12	2.83352e-13	-0.297991	0.0430756	0.0150698
ENSG00000155621	C9orf85	9	71911510	71986054	-0.268344	0.00587508	0.0018752	-0.298178	0.0377362	0.0127868
ENSG00000118454	ANKRD13C	1	70258999	70354734	-0.283418	2.78569e-05	4.88139e-06	-0.298516	0.00358293	0.000722678
ENSG00000139178	C1RL	12	7089587	7109238	0.369147	5.60352e-08	5.96176e-09	-0.298848	0.0143806	0.00383953
ENSG00000162377	COA7	1	52684449	52698347	-0.348799	6.03636e-08	6.45141e-09	-0.299756	0.0198508	0.00573044
ENSG00000088387	DOCK9	13	98793429	99086625	-1.12885	2.22003e-70	8.21242e-73	-0.299762	0.000852695	0.000128542
ENSG00000126777	KTN1	14	55559072	55701526	-0.428731	5.50259e-16	2.22582e-17	-0.299868	7.50939e-05	7.69338e-06
ENSG00000143947	RPS27A	2	55231903	55235853	-0.279834	6.73143e-05	1.28512e-05	-0.301063	0.000670738	9.71315e-05
ENSG00000171444	MCC	5	113022099	113488823	-0.476929	2.17924e-20	6.06366e-22	-0.302777	3.6671e-06	2.52463e-07
ENSG00000123473	STIL	1	47250139	47314147	-0.283381	1.07768e-07	1.19685e-08	-0.302913	8.90527e-06	6.84967e-07
ENSG00000142937	RPS8	1	44775251	44778779	-0.272502	1.41001e-05	2.30636e-06	-0.303409	4.94399e-05	4.75346e-06
ENSG00000221866	PLXNA4	7	132123332	132648688	-0.572774	8.16456e-11	6.06679e-12	-0.305629	0.0437815	0.0153791
ENSG00000077150	NFKB2	10	102394110	102402524	-0.37979	6.59456e-06	1.00337e-06	-0.306428	0.0337016	0.0110756
ENSG00000036672	USP2	11	119355215	119381711	-0.322365	8.29948e-06	1.28614e-06	-0.307473	0.00103969	0.000163395
ENSG00000141458	NPC1	18	23506184	23586506	-0.589309	3.14741e-22	7.36548e-24	-0.308133	0.00153243	0.000258659
ENSG00000169299	PGM2	4	37826660	37862937	-0.402086	2.90502e-08	2.94123e-09	-0.308262	0.00201261	0.000360891
ENSG00000170291	ELP5	17	7251416	7259940	-0.348551	4.1847e-09	3.75227e-10	-0.30854	0.000703597	0.000102502
ENSG00000121988	ZRANB3	2	135136916	135531218	-0.460543	1.44903e-07	1.63839e-08	-0.308659	0.0156181	0.00427005
ENSG00000253710	ALG11	13	52012398	52033600	-0.29243	0.000459781	0.000106118	-0.309474	0.00518871	0.0011264
ENSG00000121413	ZSCAN18	19	58083838	58118427	-0.43545	1.21691e-06	1.60101e-07	-0.310715	0.00287238	0.000555065
ENSG00000170921	TANC2	17	63009556	63427699	-0.361505	6.26408e-06	9.50568e-07	-0.311097	0.00766012	0.00181135
ENSG00000237765	FAM200B	4	15681662	15705565	-0.308254	0.000442308	0.000101765	-0.311286	0.00975776	0.0024045
ENSG00000204217	BMPR2	2	202376327	202567751	-0.45973	1.10985e-16	4.19558e-18	-0.311495	0.000555809	7.80692e-05
ENSG00000164916	FOXK1	7	4682295	4771442	-0.343917	2.62529e-05	4.55176e-06	-0.312652	0.000953311	0.000147387
ENSG00000068024	HDAC4	2	239048168	239401654	-0.256949	0.0201011	0.00774624	-0.312694	0.0155644	0.0042492
ENSG00000123975	CKS2	9	89311195	89316703	-0.383098	4.61119e-06	6.77787e-07	-0.313346	2.86202e-05	2.54715e-06
ENSG00000153093	ACOXL	2	110732573	111118222	-0.673735	1.37605e-15	5.82069e-17	-0.313412	0.0392927	0.0134417
ENSG00000052802	MSMO1	4	165327667	165343164	-0.526239	2.38578e-17	8.53778e-19	-0.314748	0.0191779	0.00549372
ENSG00000256525	POLG2	17	64477785	64497054	-0.316751	2.98332e-05	5.2637e-06	-0.314767	0.0095842	0.00235566
ENSG00000115415	STAT1	2	190908460	191020960	-0.42631	8.29434e-18	2.82815e-19	-0.31505	0.00229292	0.000420408
ENSG00000275342	PRAG1	8	8317736	8386439	-0.767321	3.21613e-11	2.27082e-12	-0.317512	0.00349824	0.000701751
ENSG00000153885	KCTD15	19	33795933	33815763	-0.352499	2.49843e-08	2.50948e-09	-0.318577	0.000324791	4.17393e-05
ENSG00000169155	ZBTB43	9	126805006	126838210	-0.267174	0.000469409	0.000108491	-0.318755	0.00292041	0.000566427
ENSG00000110700	RPS13	11	17074388	17077715	-0.272627	3.57697e-05	6.42917e-06	-0.318863	3.18483e-05	2.87812e-06
ENSG00000204310	AGPAT1	6	32168212	32178096	-0.372495	2.7826e-05	4.8715e-06	-0.319384	0.00659154	0.00150483
ENSG00000172534	HCFC1	X	153947557	153971818	-0.28577	0.00252037	0.000711825	-0.319945	0.00529524	0.00115609
ENSG00000110172	CHORDC1	11	90200429	90223077	-0.578914	8.48232e-15	3.97683e-16	-0.319955	0.000732042	0.000107515
ENSG00000089916	GPATCH2L	14	76151916	76254342	-0.321828	1.2431e-09	1.05766e-10	-0.320592	0.000360484	4.70262e-05
ENSG00000168395	ING5	2	241687085	241729478	-0.341391	1.0467e-07	1.16076e-08	-0.321457	6.39937e-06	4.70445e-07
ENSG00000179059	ZFP42	4	187995771	188005046	-0.406726	5.02633e-06	7.44552e-07	-0.321457	0.00983962	0.00243012
ENSG00000103404	USP31	16	23061406	23149270	-0.305658	2.7767e-06	3.90994e-07	-0.321686	0.00241735	0.000448196
ENSG00000177337	DLGAP1-AS1	18	3593732	3598363	-0.324284	0.0145573	0.00534293	-0.32171	0.0300489	0.00954468
ENSG00000159063	ALG8	11	78100936	78139653	-0.251468	4.86174e-05	8.98064e-06	-0.322023	0.00130144	0.000212271
ENSG00000003756	RBM5	3	50088919	50119021	-0.3174	5.35041e-05	1.00253e-05	-0.322863	0.00109641	0.000174217
ENSG00000187079	TEAD1	11	12674421	12944737	-0.337513	3.64534e-10	2.90513e-11	-0.323313	0.000580749	8.21238e-05
ENSG00000105939	ZC3HAV1	7	139043515	139109720	-0.286207	1.2344e-09	1.04889e-10	-0.324708	6.57261e-08	2.8606e-09
ENSG00000147416	ATP6V1B2	8	20197381	20226819	-0.29011	2.1113e-08	2.08838e-09	-0.325624	1.11553e-05	8.85397e-07
ENSG00000165359	INTS6L	X	135520643	135582510	-0.452282	7.57895e-10	6.35084e-11	-0.325717	0.00301229	0.000587453
ENSG00000125691	RPL23	17	38847860	38853764	-0.265584	2.77506e-05	4.84938e-06	-0.327296	3.19069e-05	2.88594e-06
ENSG00000174799	CEP135	4	55948871	56033361	-0.323128	0.000240504	5.18915e-05	-0.328168	0.00156961	0.000266674
ENSG00000111860	CEP85L	6	118460772	118710075	-0.311976	0.0039148	0.00117617	-0.328308	0.0188138	0.00536411
ENSG00000184863	RBM33	7	155644451	155781485	-0.253533	0.000403039	9.16585e-05	-0.328854	0.000999242	0.000155867
ENSG00000103485	QPRT	16	29663279	29698699	-0.290743	5.01258e-08	5.2887e-09	-0.329963	5.39462e-05	5.25503e-06
ENSG00000114784	EIF1B	3	40309707	40312424	-0.265944	0.000212473	4.51602e-05	-0.329998	0.00156893	0.000266433
ENSG00000066933	MYO9A	15	71822291	72118577	-0.408368	4.26394e-06	6.23732e-07	-0.330441	0.00527916	0.00115133
ENSG00000140939	NOL3	16	67170154	67175735	-0.28593	0.00986747	0.00341374	-0.331038	0.0276359	0.00857923
ENSG00000172530	BANP	16	87949244	88077318	-0.364851	0.00318304	0.000926115	-0.332075	0.0184311	0.005232
ENSG00000153339	TRAPPC8	18	31829180	31953136	-0.255507	2.83921e-06	4.00988e-07	-0.332851	7.12724e-05	7.24173e-06
ENSG00000131469	RPL27	17	42998273	43002959	-0.266192	0.00141065	0.000370047	-0.332962	0.000492101	6.75241e-05
ENSG00000185658	BRWD1	21	39184176	39321559	-0.329481	0.000311755	6.90699e-05	-0.333527	0.0069337	0.00159941
ENSG00000177410	ZFAS1	20	49278178	49299600	-0.356816	6.70731e-06	1.02376e-06	-0.33577	0.000268512	3.3062e-05
ENSG00000258441	LINC00641	14	21200079	21206900	-0.479786	6.42826e-06	9.7755e-07	-0.336356	0.0228089	0.00680097
ENSG00000173273	TNKS	8	9555912	9782346	-0.253115	0.000167548	3.4884e-05	-0.336405	0.00152506	0.000257174
ENSG00000109805	NCAPG	4	17810979	17844865	-0.312137	3.45389e-07	4.158e-08	-0.336991	0.000315195	4.02318e-05
ENSG00000105135	ILVBL	19	15114984	15125786	-0.265471	0.00469112	0.00144864	-0.337025	0.0174448	0.00487439
ENSG00000213741	RPS29	14	49570984	49599164	-0.29813	0.000775086	0.000190484	-0.337433	0.0102678	0.00256073
ENSG00000245910	SNHG6	8	66921684	66926398	-0.262649	0.000294311	6.46868e-05	-0.339238	0.000775413	0.000114744
ENSG00000131791	PRKAB2	1	147155106	147172550	-0.331866	2.17389e-09	1.89218e-10	-0.339281	0.00180007	0.0003158
ENSG00000173821	RNF213	17	80260866	80398786	-0.410915	5.9983e-07	7.49125e-08	-0.339348	0.0247589	0.00752937
ENSG00000110721	CHKA	11	68052859	68121444	-0.329234	7.17919e-08	7.76518e-09	-0.339412	0.00201726	0.000362522
ENSG00000100097	LGALS1	22	37675636	37679802	0.332462	0.00117967	0.000303159	-0.339761	0.0306815	0.00981603
ENSG00000158615	PPP1R15B	1	204403381	204411817	-0.423302	2.00707e-18	6.60145e-20	-0.339904	0.000347557	4.50501e-05
ENSG00000269893	SNHG8	4	118278709	118285316	-1.18685	1.08564e-28	1.80722e-30	-0.342207	0.0463638	0.0165724
ENSG00000137154	RPS6	9	19375715	19380236	-0.334803	5.23434e-06	7.76626e-07	-0.343247	3.03132e-05	2.725e-06
ENSG00000142634	EFHD2	1	15409888	15430339	-0.403565	7.68607e-05	1.48777e-05	-0.343514	0.0276974	0.00860927
ENSG00000108840	HDAC5	17	44076746	44123702	-0.281318	0.00112097	0.000286396	-0.344277	0.00111858	0.000178183
ENSG00000196683	TOMM7	7	22812628	22822852	-0.290418	0.00477079	0.00147747	-0.344848	0.017902	0.00503886
ENSG00000172590	MRPL52	14	22829879	22835037	-0.267364	1.26078e-05	2.02881e-06	-0.345452	5.43471e-05	5.30268e-06
ENSG00000151338	MIPOL1	14	37197913	37552361	-0.484636	2.97462e-08	3.01888e-09	-0.345559	0.00414464	0.000863235
ENSG00000161551	ZNF577	19	51804816	51890950	-0.490424	9.46852e-07	1.22592e-07	-0.346269	0.0128605	0.00335023
ENSG00000213281	NRAS	1	114704469	114716771	-0.253882	0.000319053	7.09177e-05	-0.347829	2.94133e-07	1.47334e-08
ENSG00000138018	SELENOI	2	26308547	26395891	-0.573576	5.77026e-18	1.94894e-19	-0.34846	0.00223956	0.000408142
ENSG00000128881	TTBK2	15	42738730	42920809	-0.409797	1.6067e-06	2.14615e-07	-0.349766	0.00743934	0.00174314
ENSG00000123870	ZNF137P	19	52588505	52597345	-0.6406	5.42476e-06	8.0939e-07	-0.35017	0.0203704	0.00593202
ENSG00000164574	GALNT10	5	154190730	154420984	-0.760297	2.19665e-34	2.66743e-36	-0.350256	0.02678	0.0082617
ENSG00000153487	ING1	13	110712736	110723339	-0.401217	0.000181677	3.80886e-05	-0.351813	0.0010426	0.000164018
ENSG00000186318	BACE1	11	117285207	117316259	-0.408524	2.00584e-08	1.97116e-09	-0.352046	0.000174405	2.00393e-05
ENSG00000171729	TMEM51	1	15152532	15220478	-0.417449	8.26133e-05	1.61373e-05	-0.353516	0.045453	0.0161713
ENSG00000175105	ZNF654	3	88059255	88144664	-0.438687	0.000265168	5.77462e-05	-0.353818	0.00610788	0.00137122
ENSG00000223482	NUTM2A-AS1	10	87201647	87342612	-0.267078	0.00172282	0.000462466	-0.354916	0.032356	0.0105259
ENSG00000165323	FAT3	11	92352096	92896470	-0.386616	9.21798e-06	1.45071e-06	-0.355809	0.000647323	9.30747e-05
ENSG00000125458	NT5C	17	75130225	75131757	-0.333575	0.000280298	6.14019e-05	-0.356171	0.00884667	0.00214779
ENSG00000100564	PIGH	14	67581955	67600286	-0.399256	5.73961e-06	8.62673e-07	-0.356563	0.00859027	0.00207398
ENSG00000165637	VDAC2	10	75210154	75231448	-0.296874	4.09801e-08	4.2941e-09	-0.35726	6.49927e-09	2.23208e-10
ENSG00000170681	CAVIN4	9	100578079	100588389	-0.298057	0.00260934	0.000739472	-0.357976	0.0152441	0.00413039
ENSG00000142541	RPL13A	19	49487554	49492308	-0.259219	3.89575e-05	7.05213e-06	-0.358287	5.28401e-05	5.10964e-06
ENSG00000198853	RUSC2	9	35490111	35561898	-0.45438	7.83693e-09	7.28548e-10	-0.358626	0.000687444	9.99859e-05
ENSG00000113272	THG1L	5	157731420	157741449	-0.259897	0.000324807	7.23274e-05	-0.359125	0.000552483	7.73733e-05
ENSG00000134419	RPS15A	16	18781295	18790383	-0.262353	0.00207535	0.000569783	-0.359897	3.69435e-06	2.54998e-07
ENSG00000174718	RESF1	12	31959370	31993107	-0.303701	2.20437e-08	2.18753e-09	-0.36089	6.17834e-08	2.65477e-09
ENSG00000106588	PSMA2	7	42916861	42932185	-0.259907	0.00434225	0.0013224	-0.361435	0.0120039	0.00308907
ENSG00000182718	ANXA2	15	60347134	60402883	-0.331136	3.33241e-06	4.75943e-07	-0.361617	0.000368426	4.83674e-05
ENSG00000137818	RPLP1	15	69452814	69456205	-0.282384	0.0104304	0.0036387	-0.362009	0.00779139	0.00184781
ENSG00000100359	SGSM3	22	40370591	40410289	-0.278512	0.0479612	0.0211631	-0.362988	0.0143093	0.00381254
ENSG00000065970	FOXJ2	12	8032716	8055517	-0.445214	1.17125e-13	6.06584e-15	-0.363154	0.00160389	0.000273259
ENSG00000197989	SNHG12	1	28578538	28583132	-0.685742	6.98564e-14	3.54478e-15	-0.364306	0.03362	0.0110275
ENSG00000260808	AP003096.1	11	68612899	68616711	-0.33933	2.33375e-07	2.7213e-08	-0.364373	0.00026428	3.24154e-05
ENSG00000163344	PMVK	1	154924740	154936719	-0.346129	0.00454278	0.00139517	-0.365064	0.0310196	0.00996595
ENSG00000171863	RPS7	2	3575260	3580920	-0.267384	0.00041344	9.4225e-05	-0.366117	1.06289e-05	8.3689e-07
ENSG00000105755	ETHE1	19	43506719	43527230	-0.61443	1.34092e-09	1.14304e-10	-0.366146	0.00642945	0.0014611
ENSG00000139163	ETNK1	12	22625075	22690665	-0.285975	5.0794e-05	9.44397e-06	-0.366431	0.00382502	0.000783952
ENSG00000175155	YPEL2	17	59331655	59401729	-0.434331	8.61122e-06	1.33999e-06	-0.367783	0.014342	0.00382583
ENSG00000177189	RPS6KA3	X	20149911	20267519	-0.315565	0.000143159	2.94492e-05	-0.368735	0.00325068	0.000642698
ENSG00000167526	RPL13	16	89560657	89566828	-0.302102	5.05244e-05	9.38978e-06	-0.369743	4.08956e-05	3.83861e-06
ENSG00000162775	RBM15	1	110338506	110346681	-0.342156	5.729e-05	1.08038e-05	-0.370387	0.0017264	0.00029905
ENSG00000249459	ZNF286B	17	18658429	18682228	-0.423739	8.26437e-05	1.61499e-05	-0.370789	0.041849	0.014548
ENSG00000138326	RPS24	10	78033760	78056813	-0.3127	9.57343e-05	1.89082e-05	-0.370819	0.000314474	4.01149e-05
ENSG00000177463	NR2C2	3	14947584	15053600	-0.341446	3.62405e-05	6.52533e-06	-0.371167	0.0173296	0.00483671
ENSG00000101493	ZNF516	18	76357682	76495242	-0.390857	3.88331e-08	4.05039e-09	-0.371312	0.0158119	0.00433428
ENSG00000157764	BRAF	7	140719327	140924928	-0.51851	8.1211e-15	3.76829e-16	-0.371544	0.000647323	9.30531e-05
ENSG00000169957	ZNF768	16	30524004	30526821	-0.326312	0.000709199	0.000172409	-0.371609	0.00142608	0.000237605
ENSG00000163946	TASOR	3	56620133	56683237	-0.357982	8.7525e-10	7.36942e-11	-0.371922	0.000350308	4.55175e-05
ENSG00000255857	PXN-AS1	12	120201291	120213231	-0.358969	0.00348048	0.00102665	-0.371955	0.0123666	0.0031971
ENSG00000101445	PPP1R16B	20	38805697	38923024	-0.309943	2.61362e-05	4.52943e-06	-0.372379	0.00389578	0.000801623
ENSG00000072832	CRMP1	4	5748084	5893086	-0.442746	1.54318e-10	1.17895e-11	-0.372587	0.000658319	9.49163e-05
ENSG00000088854	C20orf194	20	3249305	3407625	-0.381149	8.64793e-12	5.59142e-13	-0.373542	0.00132191	0.000216012
ENSG00000115750	TAF1B	2	9843443	9934416	-0.353363	2.6917e-07	3.16684e-08	-0.37437	0.00243845	0.000452686
ENSG00000242125	SNHG3	1	28505980	28510892	-0.422415	1.56039e-09	1.33891e-10	-0.375143	1.33642e-05	1.09244e-06
ENSG00000271601	LIX1L	1	145933423	145958017	-0.277045	2.99921e-07	3.54309e-08	-0.375545	0.000747514	0.000110261
ENSG00000171150	SOCS5	2	46698952	46780245	-0.254325	0.00199774	0.000546225	-0.3756	0.00235008	0.000433119
ENSG00000174579	MSL2	3	136148917	136197241	-0.342028	3.16974e-07	3.7573e-08	-0.375662	0.00262365	0.000494475
ENSG00000230530	LIMD1-AS1	3	45676369	45689200	-0.676289	2.32811e-20	6.49663e-22	-0.375929	0.00405129	0.000839944
ENSG00000162419	GMEB1	1	28668732	28719353	-0.329459	1.58423e-07	1.8091e-08	-0.377076	4.5121e-05	4.29537e-06
ENSG00000117481	NSUN4	1	46340177	46365152	-0.5801	2.04015e-21	5.15165e-23	-0.37715	1.00354e-05	7.84601e-07
ENSG00000175061	SNHG29	17	16438767	16478678	-0.363781	7.96362e-09	7.42246e-10	-0.377411	4.20106e-05	3.95605e-06
ENSG00000105372	RPS19	19	41860255	41872925	-0.29277	2.81262e-06	3.96955e-07	-0.377423	9.08983e-06	7.00601e-07
ENSG00000051382	PIK3CB	3	138652698	138834928	-0.500358	6.76095e-16	2.76201e-17	-0.378185	1.60336e-08	6.0394e-10
ENSG00000148408	CACNA1B	9	137877782	138124624	-0.360056	0.000472032	0.000109287	-0.379776	0.0241975	0.0073126
ENSG00000070501	POLB	8	42338454	42371808	0.348379	2.77919e-05	4.85959e-06	-0.380108	6.42476e-05	6.44154e-06
ENSG00000185324	CDK10	16	89680737	89696354	-0.453846	3.27443e-08	3.37055e-09	-0.380392	0.00352545	0.000708048
ENSG00000151726	ACSL1	4	184755595	184826818	-0.498626	1.58738e-13	8.34861e-15	-0.381032	0.00208799	0.000377051
ENSG00000112130	RNF8	6	37353979	37394734	-0.58052	2.64679e-22	6.15136e-24	-0.3817	1.56977e-06	9.65189e-08
ENSG00000135926	TMBIM1	2	218274197	218292586	-0.252632	1.55685e-05	2.56033e-06	-0.381728	1.598e-07	7.49875e-09
ENSG00000269556	TMEM185A	X	149596556	149631912	-0.350959	0.00238014	0.000665329	-0.382179	0.0006632	9.58825e-05
ENSG00000150687	PRSS23	11	86791059	86952910	0.793754	9.27747e-09	8.76641e-10	-0.384178	0.0295429	0.00933018
ENSG00000095739	BAMBI	10	28677510	28682932	-0.32686	0.000737665	0.000179945	-0.384611	0.038448	0.0130827
ENSG00000102886	GDPD3	16	30104810	30113537	-0.457632	0.000446815	0.000102945	-0.38506	0.0411281	0.0142135
ENSG00000160447	PKN3	9	128702503	128720916	-0.370693	0.000759481	0.000186176	-0.385078	0.00463027	0.000980868
ENSG00000204569	PPP1R10	6	30600413	30618612	-0.472138	1.34206e-06	1.77538e-07	-0.385432	3.77927e-06	2.62279e-07
ENSG00000168283	BMI1	10	22321099	22331484	-0.519079	6.2122e-07	7.78835e-08	-0.38563	0.00271388	0.000514558
ENSG00000013297	CLDN11	3	170418865	170454733	0.363581	1.16947e-08	1.12009e-09	-0.385889	0.00104832	0.00016525
ENSG00000166263	STXBP4	17	54968727	55173632	-0.396255	6.65346e-06	1.01447e-06	-0.38613	0.00200703	0.000359254
ENSG00000173221	GLRX	5	95751319	95822726	-0.426867	1.75811e-11	1.18762e-12	-0.386224	0.00336914	0.000669722
ENSG00000140988	RPS2	16	1962058	1964841	-0.27491	0.000101067	2.00264e-05	-0.388172	0.00135529	0.000222968
ENSG00000196935	SRGAP1	12	63844700	64162217	-0.415903	9.17977e-07	1.18706e-07	-0.38964	0.0001476	1.65272e-05
ENSG00000144895	EIF2A	3	150546678	150586016	-0.275123	4.12387e-05	7.50156e-06	-0.389698	4.38011e-07	2.30496e-08
ENSG00000219665	ZNF433-AS1	19	11987617	12046275	-0.502292	2.01151e-05	3.40186e-06	-0.389882	0.0205407	0.00600112
ENSG00000032444	PNPLA6	19	7534004	7561764	-0.303769	0.0141439	0.00516732	-0.390018	0.0354315	0.0118208
ENSG00000275896	PRSS2	7	142760398	142774564	0.884575	2.72625e-11	1.90958e-12	-0.390405	0.00822142	0.00196671
ENSG00000144935	TRPC1	3	142724034	142807888	-0.262305	0.00243704	0.000684957	-0.390512	0.000640471	9.18361e-05
ENSG00000261609	GAN	16	81314966	81380198	-0.727653	7.94017e-23	1.80067e-24	-0.391439	0.00406347	0.000843113
ENSG00000124570	SERPINB6	6	2948159	2972165	-0.309185	2.39088e-12	1.44395e-13	-0.391975	1.82731e-09	5.62495e-11
ENSG00000104332	SFRP1	8	41261962	41309473	-0.382534	4.49155e-10	3.63731e-11	-0.392026	6.86818e-06	5.09257e-07
ENSG00000085224	ATRX	X	77504878	77786233	-0.266696	0.00448829	0.00137626	-0.3922	0.0162617	0.00448005
ENSG00000171858	RPS21	20	62387103	62388520	-0.333575	3.72771e-05	6.71798e-06	-0.392528	0.00402948	0.000834466
ENSG00000104472	CHRAC1	8	140511311	140517154	-0.353399	2.26742e-08	2.25922e-09	-0.3928	0.000425504	5.70392e-05
ENSG00000118960	HS1BP3	2	20560448	20651130	-0.29187	2.04286e-05	3.45981e-06	-0.39287	0.000348306	4.52023e-05
ENSG00000134852	CLOCK	4	55427903	55546909	-0.497093	7.81948e-20	2.25749e-21	-0.393689	9.30604e-08	4.16809e-09
ENSG00000224032	EPB41L4A-AS1	5	112160526	112164818	-0.443661	8.23354e-08	8.98505e-09	-0.39467	0.00032106	4.1209e-05
ENSG00000136205	TNS3	7	47275154	47582558	-0.573237	2.78114e-19	8.38702e-21	-0.394849	0.000307858	3.90517e-05
ENSG00000146373	RNF217	6	124962545	125092633	-0.424299	4.37431e-05	7.9923e-06	-0.395745	0.0103058	0.00257463
ENSG00000108256	NUFIP2	17	29255839	29294148	-0.323298	2.1807e-06	2.983e-07	-0.39611	0.000588777	8.34455e-05
ENSG00000125844	RRBP1	20	17613678	17682295	-0.303182	3.4747e-05	6.2145e-06	-0.396996	9.72629e-06	7.56583e-07
ENSG00000175387	SMAD2	18	47808957	47931146	-0.46038	9.83924e-18	3.37865e-19	-0.397107	4.30988e-05	4.06875e-06
ENSG00000153363	LINC00467	1	211382736	211435570	0.375083	1.34283e-07	1.51075e-08	-0.39755	2.76527e-05	2.43145e-06
ENSG00000155465	SLC7A7	14	22773222	22829820	-0.61579	2.17224e-09	1.88837e-10	-0.397839	0.0321757	0.0104596
ENSG00000174529	TMEM81	1	205083129	205084460	-0.283057	0.0170499	0.00639495	-0.398112	0.0314913	0.0101623
ENSG00000175581	MRPL48	11	73787872	73865133	-0.30988	4.10101e-05	7.45127e-06	-0.398237	0.000111722	1.2059e-05
ENSG00000054282	SDCCAG8	1	243256034	243500091	-0.429391	7.09672e-06	1.08701e-06	-0.399154	0.00114501	0.00018321
ENSG00000115355	CCDC88A	2	55287842	55419895	-0.295615	2.48135e-05	4.28224e-06	-0.39932	0.0109123	0.00275721
ENSG00000115966	ATF2	2	175072250	175168382	-0.406337	3.35083e-10	2.65964e-11	-0.399404	6.74569e-05	6.79534e-06
ENSG00000158352	SHROOM4	X	50591647	50814302	-0.61822	5.87359e-36	6.84898e-38	-0.399795	0.00248468	0.000462253
ENSG00000137726	FXYD6	11	117836976	117877486	-0.758704	4.10424e-28	7.03018e-30	-0.400103	0.000162276	1.84658e-05
ENSG00000099251	HSD17B7P2	10	38356380	38378505	-0.442695	0.00537877	0.0016969	-0.401296	0.015575	0.00425579
ENSG00000170325	PRDM10	11	129899706	130002835	-0.256827	0.00131427	0.000342229	-0.402221	0.00930885	0.00227767
ENSG00000181458	TMEM45A	3	100492619	100577444	-0.412878	0.00185557	0.000503174	-0.402521	0.0337165	0.0110912
ENSG00000139734	DIAPH3	13	59665583	60163928	-0.567498	1.85125e-10	1.41877e-11	-0.402773	0.000805043	0.000120304
ENSG00000139684	ESD	13	46771256	46797420	-0.295056	0.000196122	4.13221e-05	-0.402859	8.43506e-05	8.79083e-06
ENSG00000127311	HELB	12	66302545	66347645	-0.382508	0.000527291	0.000123183	-0.40384	0.00601801	0.00134675
ENSG00000251287	ALG1L2	3	130081831	130113227	-5.36874	0	0	-0.403925	0.000557129	7.82987e-05
ENSG00000115825	PRKD3	2	37250502	37324808	0.279935	0.000166982	3.47393e-05	-0.404095	0.00200221	0.000358089
ENSG00000140545	MFGE8	15	88898683	88913381	0.414518	4.60595e-17	1.67051e-18	-0.404199	0.0141095	0.00374928
ENSG00000167081	PBX3	9	125747345	125967377	-0.257925	0.000191652	4.03031e-05	-0.40452	0.00934447	0.00228713
ENSG00000105810	CDK6	7	92604921	92836594	-0.714383	1.11694e-23	2.44317e-25	-0.407235	0.00189066	0.00033469
ENSG00000130348	QRSL1	6	106629578	106668417	-0.279405	6.13976e-05	1.16228e-05	-0.408536	6.90754e-05	6.98088e-06
ENSG00000196236	XPNPEP3	22	40857077	40932815	-0.383173	1.92587e-12	1.14607e-13	-0.40857	0.000111759	1.20718e-05
ENSG00000163755	HPS3	3	149129638	149173732	-0.295965	1.17697e-05	1.88638e-06	-0.4104	0.000147205	1.6448e-05
ENSG00000162783	IER5	1	181088700	181092900	-0.502414	2.8331e-09	2.49477e-10	-0.410506	0.0133466	0.00350325
ENSG00000112335	SNX3	6	108211222	108261246	-0.295064	8.52414e-06	1.32376e-06	-0.410515	9.66828e-08	4.34564e-09
ENSG00000273230	AC102953.2	7	1464497	1467522	-0.613238	6.93363e-05	1.32625e-05	-0.41163	0.0202898	0.00589963
ENSG00000279207	AC015813.6	17	58095672	58101479	-0.683283	4.48487e-08	4.7175e-09	-0.412657	0.00764169	0.00180566
ENSG00000269973	AC010969.2	2	9936360	9939590	-0.417686	0.00224099	0.000620666	-0.412837	0.0148577	0.00399042
ENSG00000179152	TCAIM	3	44338119	44409451	-0.329802	1.84271e-05	3.08231e-06	-0.412989	2.24119e-05	1.91894e-06
ENSG00000134871	COL4A2	13	110305812	110513209	-0.653384	3.52346e-18	1.17307e-19	-0.413926	1.63879e-05	1.36296e-06
ENSG00000235174	RPL39P3	6	73373108	73373263	-0.464575	0.0039248	0.00117949	-0.415536	0.0283302	0.00886371
ENSG00000211456	SACM1L	3	45689056	45745409	-0.284786	1.96971e-06	2.67064e-07	-0.415999	7.16684e-08	3.15325e-09
ENSG00000197008	ZNF138	7	64794388	64833681	-0.427555	6.10467e-07	7.63881e-08	-0.41636	0.0134853	0.00354928
ENSG00000123066	MED13L	12	115953872	116277719	-0.493665	1.82916e-20	5.03075e-22	-0.417312	1.93993e-07	9.34886e-09
ENSG00000100038	TOP3B	22	21957025	21982816	-0.454227	5.47756e-08	5.81894e-09	-0.417968	0.000334688	4.32231e-05
ENSG00000053254	FOXN3	14	89124871	89619149	-0.544761	3.06265e-18	1.01719e-19	-0.418624	2.98943e-06	2.01077e-07
ENSG00000176406	RIMS2	8	103500696	104256094	-0.514872	1.39084e-13	7.27018e-15	-0.418728	1.63686e-05	1.36006e-06
ENSG00000089685	BIRC5	17	78214186	78225636	-0.310573	3.21473e-08	3.29967e-09	-0.42016	2.44526e-08	9.59762e-10
ENSG00000138185	ENTPD1	10	95711779	95877266	-0.761368	2.0669e-09	1.79181e-10	-0.420315	0.0146292	0.0039202
ENSG00000166949	SMAD3	15	67063763	67195169	-0.954843	5.83546e-15	2.67018e-16	-0.421329	5.72474e-06	4.1632e-07
ENSG00000152556	PFKM	12	48105139	48146404	-0.334166	1.50611e-11	1.01013e-12	-0.421726	0.000519324	7.20404e-05
ENSG00000163069	SGCB	4	52020706	52038482	-0.264	0.00297051	0.000855679	-0.422078	1.19398e-05	9.61835e-07
ENSG00000122026	RPL21	13	27251309	27256691	-0.3202	3.83047e-06	5.54778e-07	-0.422864	4.89414e-09	1.62273e-10
ENSG00000151746	BICD1	12	32106835	32383633	-0.27585	0.00247978	0.000698168	-0.42469	0.00132587	0.000217079
ENSG00000116786	PLEKHM2	1	15684320	15734769	-0.285486	0.000551696	0.000129639	-0.426369	4.58615e-06	3.25171e-07
ENSG00000278129	ZNF8	19	58278955	58302791	-0.406695	1.21847e-06	1.60405e-07	-0.426477	0.000148687	1.66842e-05
ENSG00000229259	LRRC37A12P	1	32423214	32426789	0.296395	0.00410585	0.00124116	-0.426907	0.0374529	0.0126714
ENSG00000130255	RPL36	19	5674947	5691875	-0.352039	5.16085e-05	9.6286e-06	-0.427317	0.00218738	0.000397422
ENSG00000091136	LAMB1	7	107923799	108003187	-0.517839	1.17174e-26	2.139e-28	-0.427779	4.95736e-12	8.98343e-14
ENSG00000165338	HECTD2	10	91409280	91514829	-0.394651	1.66277e-05	2.74521e-06	-0.427897	0.000548503	7.66524e-05
ENSG00000166924	NYAP1	7	100483927	100494802	-0.401227	0.0178055	0.00674131	-0.428946	0.0279019	0.00870155
ENSG00000177954	RPS27	1	153990762	153992155	-0.289154	8.99902e-06	1.41191e-06	-0.429145	1.03425e-07	4.66507e-09
ENSG00000164010	ERMAP	1	42817122	42844991	-0.34958	7.69313e-05	1.48975e-05	-0.429468	0.00183695	0.000323723
ENSG00000158813	EDA	X	69616067	70039472	-0.368948	4.64268e-06	6.83615e-07	-0.430019	0.000664886	9.62314e-05
ENSG00000149311	ATM	11	108222484	108369102	-0.579017	4.3811e-10	3.53377e-11	-0.43089	0.0010638	0.000167941
ENSG00000081026	MAGI3	1	113390515	113685923	-0.621943	1.17469e-34	1.41699e-36	-0.431063	1.97702e-08	7.5564e-10
ENSG00000178764	ZHX2	8	122781655	122974510	-0.417622	1.19172e-14	5.67348e-16	-0.432726	5.5876e-11	1.24247e-12
ENSG00000154040	CABYR	18	24138956	24161603	-0.257792	0.0118814	0.00421845	-0.433095	0.0349171	0.0115977
ENSG00000206535	LNP1	3	100401532	100456319	-0.280457	0.0016241	0.000432309	-0.433262	0.00140534	0.000233203
ENSG00000151718	WWC2	4	183099257	183320777	-0.37827	5.23096e-13	2.89417e-14	-0.433419	2.84811e-09	9.08277e-11
ENSG00000117724	CENPF	1	214603195	214664571	-0.452756	1.52675e-07	1.73976e-08	-0.433891	8.75728e-06	6.70659e-07
ENSG00000127483	HP1BP3	1	20740266	20787323	-0.436859	3.78151e-11	2.70346e-12	-0.434243	4.10264e-07	2.13946e-08
ENSG00000163931	TKT	3	53224712	53256052	-0.251262	1.30984e-05	2.11934e-06	-0.434592	2.03055e-08	7.82526e-10
ENSG00000196876	SCN8A	12	51590266	51812864	-0.587776	1.10389e-19	3.22245e-21	-0.435291	0.00349018	0.000699584
ENSG00000230551	AC021078.1	5	149494314	149504670	-0.330451	0.0488017	0.0216007	-0.435867	0.00295163	0.000573181
ENSG00000254535	PABPC4L	4	134196333	134201789	0.251448	0.0224426	0.00882725	-0.437904	0.00214455	0.000388623
ENSG00000187498	COL4A1	13	110148963	110307157	-0.677069	4.68125e-40	4.74337e-42	-0.438441	4.15308e-13	6.4743e-15
ENSG00000223756	TSSC2	11	3380961	3408978	0.251601	0.000401035	9.09788e-05	-0.438601	0.000284804	3.55188e-05
ENSG00000165996	HACD1	10	17589032	17617374	-0.310906	0.00197789	0.000540083	-0.439441	0.00531787	0.00116272
ENSG00000100031	GGT1	22	24594811	24629005	-1.40841	3.0654e-31	4.4126e-33	-0.43956	0.00262365	0.000494543
ENSG00000144029	MRPS5	2	95085369	95149434	-0.301582	4.52763e-09	4.07432e-10	-0.439988	2.53589e-09	7.98673e-11
ENSG00000139263	LRIG3	12	58872149	58920522	-0.734197	4.2095e-42	3.89298e-44	-0.440404	1.81063e-06	1.13621e-07
ENSG00000124216	SNAI1	20	49982980	49988886	-0.306956	0.00604384	0.00193782	-0.440419	0.00124943	0.000202389
ENSG00000136944	LMX1B	9	126614443	126701032	-0.460903	2.23507e-09	1.94838e-10	-0.441186	0.00010073	1.06972e-05
ENSG00000173406	DAB1	1	56994778	58546734	-0.547671	8.62955e-26	1.70717e-27	-0.441853	4.27812e-09	1.41171e-10
ENSG00000079134	THOC1	18	214520	268050	-0.365941	1.93497e-06	2.61886e-07	-0.444385	0.000108977	1.17109e-05
ENSG00000125733	TRIP10	19	6737925	6751530	-0.355943	2.60643e-10	2.03526e-11	-0.44485	2.15684e-10	5.51286e-12
ENSG00000132824	SERINC3	20	44496221	44522085	-0.258498	1.53211e-05	2.51471e-06	-0.445374	2.14095e-09	6.67511e-11
ENSG00000141034	GID4	17	18039408	18068405	-0.263462	2.0598e-06	2.7994e-07	-0.445515	8.89054e-06	6.82427e-07
ENSG00000174607	UGT8	4	114598770	114678225	0.498737	7.67727e-05	1.48544e-05	-0.445929	0.0452499	0.0160704
ENSG00000115657	ABCB6	2	219209772	219218994	-0.546741	9.41818e-07	1.21864e-07	-0.44703	0.00515445	0.00111516
ENSG00000141384	TAF4B	18	26225936	26391685	-0.294662	0.000118175	2.3863e-05	-0.447779	1.2103e-05	9.75941e-07
ENSG00000164506	STXBP5	6	147204425	147390476	-0.386471	5.2059e-10	4.26603e-11	-0.448121	1.69816e-06	1.05891e-07
ENSG00000166012	TAF1D	11	93729948	93784391	-0.658415	1.42909e-09	1.2205e-10	-0.448136	0.000707906	0.000103466
ENSG00000213073	AL353625.1	6	160093082	160096212	-0.748968	5.0378e-05	9.35447e-06	-0.449059	0.0210029	0.00617274
ENSG00000154803	FLCN	17	17212212	17237188	-0.575323	2.02161e-14	9.80321e-16	-0.44919	4.16014e-07	2.17274e-08
ENSG00000166130	IKBIP	12	98613405	98645113	-0.437411	8.65292e-09	8.1206e-10	-0.449455	0.000101639	1.08018e-05
ENSG00000158270	COLEC12	18	316737	500722	-0.435211	1.16961e-21	2.87818e-23	-0.449855	3.45804e-05	3.17427e-06
ENSG00000183172	SMDT1	22	42079691	42084284	-0.810943	3.54201e-16	1.40997e-17	-0.450808	0.00205548	0.000370204
ENSG00000168672	LRATD2	8	126552443	126558478	-0.453402	8.78076e-11	6.55997e-12	-0.451114	0.000405995	5.40706e-05
ENSG00000158321	AUTS2	7	69598296	70793506	-0.369	5.45935e-09	4.983e-10	-0.451453	1.07336e-09	3.08324e-11
ENSG00000153721	CNKSR3	6	154387515	154510685	-0.33012	0.00217342	0.000599505	-0.452763	5.12173e-05	4.94057e-06
ENSG00000140416	TPM1	15	63042632	63071915	-0.377847	9.89659e-13	5.69044e-14	-0.454694	6.3994e-07	3.50201e-08
ENSG00000198933	TBKBP1	17	47694081	47712050	-0.323934	0.00156408	0.000415704	-0.45489	0.000348075	4.51448e-05
ENSG00000224411	HSP90AA2P	11	27888838	27891033	-0.669957	5.77217e-05	1.08898e-05	-0.455013	0.0201674	0.00584726
ENSG00000158966	CACHD1	1	64470129	64693058	-0.541529	8.29821e-21	2.2222e-22	-0.455065	1.14133e-06	6.7105e-08
ENSG00000121957	GPSM2	1	108875350	108934545	-0.312436	0.000400873	9.09096e-05	-0.455498	0.00654299	0.00149116
ENSG00000196267	ZNF836	19	52153864	52171643	-1.01491	2.36947e-42	2.17225e-44	-0.4563	1.9485e-05	1.64829e-06
ENSG00000124942	AHNAK	11	62433542	62556235	-0.96766	1.62278e-74	5.48104e-77	-0.456405	0.0017784	0.000310871
ENSG00000284946	AC068831.8	15	90966190	91022566	-0.465914	0.000240949	5.20071e-05	-0.456765	0.00885107	0.00214956
ENSG00000146426	TIAM2	6	154832697	155257723	-0.279198	3.74338e-05	6.75341e-06	-0.456983	6.29925e-08	2.72168e-09
ENSG00000156976	EIF4A2	3	186783205	186789897	-0.274167	8.60559e-05	1.68721e-05	-0.457865	5.34808e-05	5.18853e-06
ENSG00000164442	CITED2	6	139371807	139374648	-0.351037	0.000675267	0.0001634	-0.459464	5.73882e-05	5.65844e-06
ENSG00000006459	KDM7A	7	140084746	140176983	-0.456993	2.04918e-19	6.11375e-21	-0.460062	1.60148e-06	9.89757e-08
ENSG00000096968	JAK2	9	4984390	5128183	-0.492252	6.66262e-07	8.40664e-08	-0.461114	0.00277375	0.000531222
ENSG00000145911	N4BP3	5	178113532	178126081	-0.350002	0.0045348	0.00139235	-0.461151	3.97009e-06	2.76464e-07
ENSG00000136143	SUCLA2	13	47745736	48037968	-0.255115	0.000136655	2.79684e-05	-0.461813	4.30371e-08	1.79477e-09
ENSG00000066084	DIP2B	12	50504985	50748657	-0.37394	3.41048e-11	2.41079e-12	-0.461847	2.71e-09	8.55653e-11
ENSG00000116396	KCNC4	1	110211343	110283100	-0.294396	0.00120619	0.000310762	-0.463704	3.15235e-05	2.84378e-06
ENSG00000151835	SACS	13	23328826	23433740	-0.597864	1.94796e-17	6.95533e-19	-0.46424	0.00238191	0.000440495
ENSG00000100523	DDHD1	14	53036745	53153323	-0.402342	2.26852e-06	3.11955e-07	-0.464308	0.000710923	0.00010402
ENSG00000225377	NRSN2-AS1	20	316860	348490	-0.508429	0.000593562	0.000140985	-0.46454	0.0188431	0.00537841
ENSG00000173156	RHOD	11	67056847	67072017	-0.321868	0.00446671	0.00136677	-0.465376	0.00795978	0.00189594
ENSG00000198546	ZNF511	10	133308914	133313162	-0.325176	0.000429035	9.82278e-05	-0.467386	0.000706811	0.000103031
ENSG00000130558	OLFM1	9	135075422	135121179	-0.538982	9.80264e-08	1.08235e-08	-0.468167	0.0127696	0.00332048
ENSG00000126214	KLC1	14	103561896	103714249	-0.586234	1.54112e-11	1.03485e-12	-0.468867	1.56977e-06	9.63156e-08
ENSG00000104863	LIN7B	19	49114324	49118460	-0.332348	0.0347613	0.0145782	-0.469443	0.0102841	0.00256675
ENSG00000232593	KANTR	X	53094145	53170914	-0.375283	0.00437393	0.00133381	-0.46974	0.0110707	0.0028095
ENSG00000197961	ZNF121	19	9560353	9584533	-0.391223	1.90491e-06	2.57511e-07	-0.469958	0.000779578	0.000115731
ENSG00000177045	SIX5	19	45764785	45769252	-0.411631	0.00193764	0.000527768	-0.470402	0.00361247	0.000732497
ENSG00000112306	RPS12	6	132814569	132817564	-0.446558	8.3146e-09	7.77634e-10	-0.471224	6.16273e-06	4.52074e-07
ENSG00000163584	RPL22L1	3	170864875	170870208	-0.807429	2.2261e-11	1.5324e-12	-0.471692	0.000153146	1.72815e-05
ENSG00000105640	RPL18A	19	17859910	17864153	-0.309645	0.00067279	0.000162692	-0.472321	7.83029e-06	5.91749e-07
ENSG00000076641	PAG1	8	80967810	81112068	-0.400194	6.24783e-07	7.84308e-08	-0.473271	5.7017e-05	5.6147e-06
ENSG00000183166	CALN1	7	71779491	72447151	-0.42528	2.63847e-11	1.84173e-12	-0.47337	0.00239694	0.000443988
ENSG00000135063	FAM189A2	9	69324567	69392558	0.27964	0.0286666	0.0116395	-0.473415	0.00360939	0.000730039
ENSG00000108582	CPD	17	30378927	30469989	-0.279996	9.74694e-06	1.53931e-06	-0.474737	1.24022e-05	1.00497e-06
ENSG00000151914	DST	6	56457987	56954649	-0.410905	5.88707e-11	4.32239e-12	-0.475222	2.69762e-07	1.33632e-08
ENSG00000173852	DPY19L1	7	34928876	35038271	-0.278343	1.05347e-05	1.67319e-06	-0.475562	4.81911e-07	2.55886e-08
ENSG00000267980	AC007292.1	19	4363789	4364640	-0.57363	0.00653056	0.00211698	-0.47584	0.0278826	0.00869332
ENSG00000267041	ZNF850	19	36714383	36772825	-0.535273	6.52368e-10	5.4141e-11	-0.47781	2.85201e-07	1.42183e-08
ENSG00000165097	KDM1B	6	18155329	18223854	-0.399973	5.99071e-08	6.3978e-09	-0.478943	0.000109993	1.18549e-05
ENSG00000064102	INTS13	12	26905181	26938326	-0.479371	1.09347e-15	4.54621e-17	-0.479157	1.86174e-09	5.75146e-11
ENSG00000119397	CNTRL	9	121074863	121177610	-0.541054	5.25819e-18	1.7633e-19	-0.479887	0.0119559	0.00307483
ENSG00000231889	TRAF3IP2-AS1	6	111483511	111598302	-0.281382	0.0430916	0.0186436	-0.480007	0.0330129	0.0107761
ENSG00000165704	HPRT1	X	134460165	134520513	-0.270607	0.020844	0.0080734	-0.480476	0.000521452	7.23768e-05
ENSG00000203666	EFCAB2	1	244969705	245127164	-0.874692	2.73774e-31	3.91892e-33	-0.481317	1.94632e-06	1.23368e-07
ENSG00000165494	PCF11	11	83156988	83187451	-0.484608	1.42768e-08	1.38347e-09	-0.484469	9.01734e-05	9.49757e-06
ENSG00000205339	IPO7	11	9384652	9448127	-0.477917	3.15015e-15	1.40598e-16	-0.486194	1.67121e-11	3.39876e-13
ENSG00000184924	PTRHD1	2	24789734	24793382	-0.291007	0.0129779	0.00465472	-0.486373	0.00276795	0.000529847
ENSG00000136161	RCBTB2	13	48488959	48533256	-0.298903	0.00864612	0.00292793	-0.486432	0.00170336	0.000294196
ENSG00000165185	KIAA1958	9	112486847	112669397	-0.414971	2.12806e-07	2.46263e-08	-0.486635	0.00900935	0.00219156
ENSG00000155980	KIF5A	12	57550044	57586633	-0.404493	7.09221e-08	7.65399e-09	-0.486934	2.55946e-06	1.66895e-07
ENSG00000275216	AL161431.1	13	109269634	109278512	-0.541968	0.0100744	0.00349263	-0.487465	0.004112	0.000855134
ENSG00000104529	EEF1D	8	143579697	143599541	-0.285003	0.00125576	0.000325782	-0.487535	4.09761e-06	2.86642e-07
ENSG00000128394	APOBEC3F	22	39040604	39055972	-0.5067	9.59858e-17	3.62021e-18	-0.488168	3.22488e-10	8.54897e-12
ENSG00000135740	SLC9A5	16	67237683	67272191	-0.378384	1.03312e-05	1.63754e-06	-0.488434	3.57259e-08	1.46161e-09
ENSG00000137460	FHDC1	4	152936352	152979696	-0.325855	6.88954e-05	1.31641e-05	-0.489379	3.77927e-06	2.62164e-07
ENSG00000242779	ZNF702P	19	52966896	53037898	-0.550555	2.09157e-11	1.43643e-12	-0.489429	1.28057e-06	7.68117e-08
ENSG00000251136	AF117829.1	8	89585872	89757812	-0.369403	0.0127237	0.00455842	-0.489505	0.000164574	1.88185e-05
ENSG00000186185	KIF18B	17	44924709	44947773	-0.29836	0.00177812	0.000479313	-0.489648	7.07363e-07	3.91269e-08
ENSG00000115085	ZAP70	2	97713560	97739862	-0.427991	0.00111498	0.000284506	-0.49211	0.0188307	0.00537339
ENSG00000233927	RPS28	19	8321158	8323340	-0.26787	0.0489982	0.0217034	-0.492186	0.00575629	0.00127543
ENSG00000272602	ZNF595	4	53286	88208	-0.529727	7.50283e-15	3.46934e-16	-0.492709	2.70248e-08	1.06499e-09
ENSG00000135541	AHI1	6	135283532	135497765	0.480261	4.44882e-11	3.21989e-12	-0.494711	9.44401e-05	9.98433e-06
ENSG00000143178	TBX19	1	168280877	168314426	-0.627707	1.12587e-08	1.07381e-09	-0.495483	0.0480323	0.0173246
ENSG00000172197	MBOAT1	6	20099684	20212469	-0.45971	8.87253e-08	9.73231e-09	-0.495887	0.00252184	0.000470763
ENSG00000179855	GIPC3	19	3585478	3593541	-0.783514	4.69818e-07	5.75796e-08	-0.497809	0.03362	0.011025
ENSG00000083535	PIBF1	13	72782133	73016461	-0.330402	1.70116e-05	2.8209e-06	-0.49814	0.000257667	3.13801e-05
ENSG00000044459	CNTLN	9	17134982	17503923	-0.343539	3.96813e-06	5.7659e-07	-0.4987	0.000485791	6.63755e-05
ENSG00000078081	LAMP3	3	183122215	183163839	-0.763577	3.47928e-05	6.22549e-06	-0.499961	0.0298335	0.00945268
ENSG00000100242	SUN2	22	38734725	38794143	0.27654	0.00117137	0.000300683	-0.500686	0.00169175	0.000291709
ENSG00000109762	SNX25	4	185204237	185370185	0.266456	0.00184818	0.000500873	-0.501811	1.4244e-11	2.82919e-13
ENSG00000258405	ZNF578	19	52453553	52516882	-0.656266	3.18882e-06	4.52871e-07	-0.501896	0.0197476	0.00568817
ENSG00000113240	CLK4	5	178602664	178630615	-0.676492	1.2344e-09	1.04926e-10	-0.502567	0.00247004	0.000459139
ENSG00000163638	ADAMTS9	3	64515654	64688000	-0.509181	2.8012e-13	1.5138e-14	-0.502915	0.0165213	0.00458104
ENSG00000155897	ADCY8	8	130780301	131040909	0.508198	0.00250901	0.000708012	-0.502992	0.0221881	0.00658251
ENSG00000179833	SERTAD2	2	64631621	64751005	-0.347343	2.35519e-11	1.62695e-12	-0.504817	1.4244e-11	2.82013e-13
ENSG00000163166	IWS1	2	127436207	127526886	-0.473804	2.66846e-21	6.82404e-23	-0.505408	7.22627e-13	1.17226e-14
ENSG00000130208	APOC1	19	44914247	44919349	-0.450004	4.1926e-06	6.11947e-07	-0.505558	2.71322e-06	1.77775e-07
ENSG00000160321	ZNF208	19	21932958	22010949	-3.84734	0.0052372	0.00164971	-0.505574	0.0331946	0.0108486
ENSG00000151422	FER	5	108747841	109196841	-0.265501	0.00193383	0.000526574	-0.506257	3.10799e-05	2.79884e-06
ENSG00000165895	ARHGAP42	11	100687288	100993941	-0.375964	3.55289e-05	6.37434e-06	-0.50753	0.00273389	0.000521595
ENSG00000102780	DGKH	13	42040036	42256578	-0.587785	5.34256e-06	7.96121e-07	-0.507779	0.00874813	0.0021194
ENSG00000170248	PDCD6IP	3	33798571	33869707	-0.362901	2.68234e-13	1.44525e-14	-0.508447	1.54481e-09	4.68198e-11
ENSG00000163682	RPL9	4	39452521	39458949	-0.341504	1.69042e-05	2.80038e-06	-0.509466	3.93174e-11	8.55606e-13
ENSG00000096092	TMEM14A	6	52671113	52686588	-0.427777	0.000105151	2.09372e-05	-0.509687	0.00099369	0.000154593
ENSG00000151743	AMN1	12	31671142	31729121	0.501052	1.51055e-05	2.47567e-06	-0.509926	0.0070771	0.00163865
ENSG00000106211	HSPB1	7	76302673	76304295	-0.404906	0.00436375	0.00133001	-0.511991	0.014477	0.00387215
ENSG00000269226	TMSB15B	X	104063871	104076212	-0.336619	0.0143274	0.0052459	-0.51222	0.00105468	0.000166419
ENSG00000095059	DHPS	19	12675717	12681880	-0.403022	0.00235967	0.000658468	-0.513461	0.00224285	0.00040963
ENSG00000158164	TMSB15A	X	102513682	102516739	0.250895	0.00847797	0.00285803	-0.513858	0.0390303	0.0133241
ENSG00000109472	CPE	4	165361194	165498547	-0.427736	1.89833e-11	1.28998e-12	-0.517611	2.81071e-08	1.10987e-09
ENSG00000145736	GTF2H2	5	71032670	71067689	-0.623967	2.39088e-12	1.44303e-13	-0.518123	8.07469e-06	6.13414e-07
ENSG00000158089	GALNT14	2	30910467	31155202	-0.759428	1.14994e-11	7.58305e-13	-0.518233	0.00080302	0.00011991
ENSG00000175984	DENND2C	1	114582848	114670422	-0.745505	5.09548e-14	2.54876e-15	-0.519282	0.00461063	0.000976342
ENSG00000186792	HYAL3	3	50292831	50299405	-0.923786	6.84843e-11	5.05027e-12	-0.519643	0.0363321	0.0122142
ENSG00000134775	FHOD3	18	36297714	36780055	-0.728568	1.34628e-10	1.02419e-11	-0.522807	0.0117597	0.00301694
ENSG00000100612	DHRS7	14	60144119	60169856	-0.306839	2.92225e-05	5.1395e-06	-0.523774	2.4139e-06	1.56635e-07
ENSG00000102057	KCND1	X	48961378	48971844	-0.47444	1.32316e-07	1.4865e-08	-0.524625	0.000193235	2.24069e-05
ENSG00000161912	ADCY10P1	6	41101022	41140835	0.717401	0.000743629	0.000181736	-0.52558	0.00748047	0.00175454
ENSG00000165288	BRWD3	X	80669503	80809877	-0.3713	5.86301e-05	1.1075e-05	-0.526059	0.0007884	0.000117352
ENSG00000109099	PMP22	17	15229777	15265326	-0.292173	0.0209841	0.00814051	-0.527559	0.0250151	0.00761517
ENSG00000123240	OPTN	10	13099449	13138308	-0.272898	1.55455e-09	1.33265e-10	-0.528114	8.51128e-15	1.01028e-16
ENSG00000163191	S100A11	1	152032506	152047907	-0.47159	1.04037e-17	3.59757e-19	-0.528439	1.5435e-11	3.07796e-13
ENSG00000198937	CCDC167	6	37482938	37499893	-0.267784	0.000580945	0.000137525	-0.53065	1.14618e-05	9.1154e-07
ENSG00000164099	PRSS12	4	118280038	118353003	-0.501862	0.000779695	0.000191911	-0.532172	0.0174839	0.00488959
ENSG00000129691	ASH2L	8	38105493	38144076	-0.373029	2.46968e-10	1.92252e-11	-0.533383	1.36464e-06	8.25026e-08
ENSG00000131016	AKAP12	6	151239967	151358559	-0.397791	3.09167e-08	3.15259e-09	-0.535805	1.48371e-13	2.16034e-15
ENSG00000180198	RCC1	1	28505943	28539300	-0.329748	3.21294e-12	1.98176e-13	-0.536773	1.63327e-18	1.36949e-20
ENSG00000170430	MGMT	10	129467190	129770983	-6.65153	4.76889e-184	3.06804e-187	-0.536994	0.00315583	0.000621826
ENSG00000146352	CLVS2	6	122996235	123072925	-0.939578	1.47024e-47	1.06411e-49	-0.537646	1.58995e-07	7.44839e-09
ENSG00000138778	CENPE	4	103105349	103198445	-0.306803	0.00381223	0.00114076	-0.541994	0.000790988	0.0001178
ENSG00000214455	RCN1P2	13	45390353	45391267	-0.66229	3.33795e-06	4.77003e-07	-0.542968	0.00388729	0.000799176
ENSG00000197134	ZNF257	19	22052430	22091480	-3.15791	0.000308586	6.82189e-05	-0.543058	0.0240085	0.00724036
ENSG00000262691	AC040160.2	16	67261108	67263784	-0.557044	3.30337e-06	4.71531e-07	-0.543716	4.02809e-10	1.08058e-11
ENSG00000110660	SLC35F2	11	107790991	107928293	-0.512979	2.07004e-15	8.92271e-17	-0.545461	6.69341e-07	3.68649e-08
ENSG00000197958	RPL12	9	127447674	127451406	-0.418113	9.88477e-05	1.95629e-05	-0.545863	3.64691e-09	1.1861e-10
ENSG00000279519	AC007382.1	2	36839922	36842539	-0.701296	9.44585e-08	1.04068e-08	-0.546478	0.0165092	0.0045736
ENSG00000105227	PRX	19	40393766	40414742	-0.405832	9.27431e-05	1.82354e-05	-0.54858	0.000299171	3.78314e-05
ENSG00000068650	ATP11A	13	112690329	112887168	-0.267923	2.7614e-05	4.81885e-06	-0.548751	2.80022e-12	4.89712e-14
ENSG00000224417	AL606970.1	6	168298069	168302114	-0.650205	3.0517e-05	5.38925e-06	-0.549755	0.0339704	0.0112148
ENSG00000199169	MIR367	4	112647874	112647941	-0.653715	0.00200724	0.000549631	-0.550395	0.000777512	0.000115178
ENSG00000138061	CYP1B1	2	38066973	38109902	0.448418	0.00268151	0.000763803	-0.554507	0.00173703	0.000301715
ENSG00000197467	COL13A1	10	69801867	69964275	0.36351	3.22692e-06	4.5958e-07	-0.555881	3.87128e-05	3.61181e-06
ENSG00000148677	ANKRD1	10	90912096	90921276	-0.836395	2.82149e-14	1.37692e-15	-0.556073	0.0241629	0.00729564
ENSG00000104976	SNAPC2	19	7920338	7923250	-0.296675	0.0208956	0.00809778	-0.559413	0.000495869	6.82374e-05
ENSG00000109323	MANBA	4	102630770	102760994	-0.276621	0.000784017	0.000193183	-0.561167	0.000706811	0.000103191
ENSG00000203872	C6orf163	6	87344813	87365463	-0.389571	0.0117899	0.00417932	-0.561555	0.00553068	0.00121756
ENSG00000137710	RDX	11	109864295	110296712	-0.47255	1.23974e-17	4.30243e-19	-0.562682	4.48551e-16	4.43688e-18
ENSG00000137831	UACA	15	70654554	70763558	-0.471166	5.64851e-17	2.07589e-18	-0.563208	2.43498e-10	6.32011e-12
ENSG00000058063	ATP11B	3	182793503	182921629	-0.375624	9.07128e-06	1.4247e-06	-0.564789	1.55827e-08	5.82026e-10
ENSG00000130813	SHFL	19	10086122	10093252	0.329569	0.0123693	0.00440857	-0.566587	0.0162617	0.00448075
ENSG00000081320	STK17B	2	196133583	196176503	-0.311516	0.0102824	0.0035796	-0.567678	0.00054554	7.61519e-05
ENSG00000265681	RPL17	18	49488453	49492523	-0.554562	3.56929e-22	8.38144e-24	-0.56907	7.68947e-11	1.79504e-12
ENSG00000100504	PYGL	14	50857891	50944483	-0.324841	2.25962e-07	2.62526e-08	-0.569358	0.000381889	5.03161e-05
ENSG00000162946	DISC1	1	231626815	232041272	-0.41489	0.000113567	2.28229e-05	-0.570052	4.0791e-06	2.84525e-07
ENSG00000181690	PLAG1	8	56160909	56211324	-0.254653	0.015989	0.00594011	-0.570313	0.00400783	0.000828548
ENSG00000133466	C1QTNF6	22	37180166	37199385	-0.354665	0.00147717	0.000389754	-0.572992	8.91332e-05	9.38096e-06
ENSG00000151229	SLC2A13	12	39755025	40106089	-0.282102	0.0239473	0.0095019	-0.574476	0.000626748	8.93725e-05
ENSG00000130203	APOE	19	44905791	44909393	-0.412633	0.00521907	0.00164232	-0.575592	0.00168452	0.000290195
ENSG00000164651	SP8	7	20782283	20786886	-0.350689	0.000633768	0.000152135	-0.57624	0.00144152	0.000240919
ENSG00000088826	SMOX	20	4120980	4187747	-0.582179	2.83518e-15	1.254e-16	-0.57626	1.54167e-07	7.19781e-09
ENSG00000124440	HIF3A	19	46297046	46343433	-0.255906	0.00309874	0.0008981	-0.576507	0.0014484	0.000242184
ENSG00000165757	JCAD	10	30012803	30115494	-0.834031	1.3431e-38	1.44733e-40	-0.576543	2.8805e-14	3.69265e-16
ENSG00000196284	SUPT3H	6	44809317	45377953	-0.32803	5.86658e-07	7.32202e-08	-0.576913	7.54403e-12	1.42678e-13
ENSG00000248730	EGFLAM-AS4	5	38282264	38290986	-0.449977	0.000306408	6.76143e-05	-0.577334	0.0190617	0.00545741
ENSG00000163171	CDC42EP3	2	37641882	37738468	-0.399238	6.6778e-05	1.27434e-05	-0.579382	1.28889e-07	5.86995e-09
ENSG00000092758	COL9A3	20	62816244	62841159	-0.552228	0.00314186	0.000911608	-0.579751	0.0234496	0.00701986
ENSG00000171766	GATM	15	45361124	45402327	0.376665	1.74335e-06	2.34409e-07	-0.581269	6.13706e-05	6.11909e-06
ENSG00000134954	ETS1	11	128458761	128587558	-0.298112	9.04211e-09	8.5222e-10	-0.581306	6.53726e-11	1.48468e-12
ENSG00000112167	SAYSD1	6	39104063	39115186	-0.915253	1.00358e-31	1.39621e-33	-0.581702	1.77837e-05	1.49171e-06
ENSG00000116691	MIIP	1	12019466	12032045	-0.686063	2.11212e-07	2.44248e-08	-0.582072	0.000288026	3.5989e-05
ENSG00000174021	GNG5	1	84498325	84506581	-0.55232	0.00338529	0.000994762	-0.58298	0.00982537	0.00242505
ENSG00000275464	FP565260.1	21	5130871	5154658	-0.754195	1.62961e-16	6.27731e-18	-0.58307	0.0104948	0.00262848
ENSG00000152078	TLCD4	1	95117355	95197607	-0.307784	0.0318237	0.0131287	-0.58367	0.00619616	0.00139692
ENSG00000164066	INTU	4	127623271	127726737	-0.779062	1.21414e-33	1.55246e-35	-0.583956	0.000317378	4.06695e-05
ENSG00000116667	C1orf21	1	184387029	184629019	-0.335151	8.15644e-07	1.04651e-07	-0.584383	5.31601e-09	1.77102e-10
ENSG00000152332	UHMK1	1	162497251	162529631	-0.385648	7.84711e-06	1.21162e-06	-0.584488	0.000273064	3.37738e-05
ENSG00000179750	APOBEC3B	22	38982347	38992804	-0.842088	2.22476e-10	1.71934e-11	-0.584541	0.0394102	0.0134944
ENSG00000007237	AC005747.1	17	9910609	10198551	0.367936	3.35165e-07	4.02414e-08	-0.584942	0.00415589	0.000866236
ENSG00000279656	AL132780.4	14	23023083	23024217	-1.60969	7.3688e-31	1.07258e-32	-0.586768	0.000866666	0.000130922
ENSG00000182118	FAM89A	1	231018958	231040254	-0.518581	1.15012e-19	3.36667e-21	-0.587486	8.71705e-18	7.51886e-20
ENSG00000280511	AL591030.1	6	76561328	76562590	-0.617448	7.7687e-16	3.17995e-17	-0.58933	0.0311155	0.0100041
ENSG00000129521	EGLN3	14	33924227	34462774	-0.602903	0.00817896	0.00274079	-0.59014	0.0481016	0.0173648
ENSG00000255666	LINC02700	11	94638045	94652884	-0.435959	1.88789e-06	2.54882e-07	-0.593908	1.36183e-06	8.22248e-08
ENSG00000124839	RAB17	2	237574322	237601614	-0.593517	2.04121e-11	1.39856e-12	-0.594093	3.65257e-07	1.87874e-08
ENSG00000171365	CLCN5	X	49922596	50099235	-1.04266	2.34802e-34	2.87012e-36	-0.594503	5.68758e-08	2.40789e-09
ENSG00000133317	LGALS12	11	63506084	63516774	-0.582412	1.12401e-06	1.46523e-07	-0.595379	0.00222957	0.000405793
ENSG00000107242	PIP5K1B	9	68705240	69009176	-0.623427	1.87026e-09	1.61833e-10	-0.595485	1.91935e-07	9.23449e-09
ENSG00000185104	FAF1	1	50437028	50960267	-0.578537	7.91236e-30	1.22169e-31	-0.596845	1.47986e-17	1.28816e-19
ENSG00000167645	YIF1B	19	38303558	38317273	-0.276995	0.00711676	0.00234535	-0.597726	0.00167307	0.000287693
ENSG00000274602	PI4KAP1	22	18533646	18577968	-3.65302	1.9298e-191	1.08633e-194	-0.598179	3.12799e-13	4.82676e-15
ENSG00000196458	ZNF605	12	132918306	132956306	-0.471794	1.2513e-11	8.30173e-13	-0.598307	1.17064e-09	3.39973e-11
ENSG00000106089	STX1A	7	73699206	73719672	-0.346403	0.0085103	0.00287212	-0.599226	6.30039e-05	6.31186e-06
ENSG00000184983	NDUFA6	22	42085526	42090884	-0.539273	4.84415e-12	3.03465e-13	-0.599748	5.13535e-05	4.96183e-06
ENSG00000174652	ZNF266	19	9412461	9435571	-0.909916	2.21807e-42	2.01561e-44	-0.600405	0.00103525	0.000162452
ENSG00000140022	STON2	14	81260656	81436465	-0.360892	0.000635879	0.000152744	-0.603143	0.00202735	0.000364495
ENSG00000092929	UNC13D	17	75827225	75844717	-0.392515	0.0162447	0.00604979	-0.603582	0.00312421	0.000614853
ENSG00000197043	ANXA6	5	151100706	151157785	-0.520547	1.4583e-29	2.33375e-31	-0.603809	4.75769e-29	1.35872e-31
ENSG00000124225	PMEPA1	20	57648392	57711536	-0.43601	7.08503e-17	2.62662e-18	-0.60514	5.84083e-12	1.07693e-13
ENSG00000187240	DYNC2H1	11	103109410	103479863	-0.687932	8.62142e-30	1.35197e-31	-0.605188	2.32439e-10	5.9963e-12
ENSG00000285205	AL121612.2	14	94770271	94774858	-0.307042	0.000672119	0.000162476	-0.605992	1.46046e-08	5.43179e-10
ENSG00000188643	S100A16	1	153606886	153613145	-1.24518	5.68473e-22	1.36232e-23	-0.606933	7.9516e-05	8.23664e-06
ENSG00000128335	APOL2	22	36226209	36239954	0.619956	0.00133092	0.000346886	-0.607744	0.0123891	0.0032039
ENSG00000140743	CDR2	16	22345936	22437165	-0.256762	0.01039	0.00362208	-0.608864	7.23804e-07	4.02082e-08
ENSG00000113790	EHHADH	3	185190624	185281990	-0.562419	4.94875e-24	1.06656e-25	-0.609968	0.0149035	0.00400745
ENSG00000189171	S100A13	1	153618787	153631360	-0.807235	6.60248e-08	7.083e-09	-0.614307	1.5143e-15	1.62969e-17
ENSG00000174485	DENND4A	15	65658046	65792293	-0.258752	0.00935714	0.00320784	-0.614429	1.22597e-06	7.29545e-08
ENSG00000162817	C1orf115	1	220690363	220699153	0.969887	1.11211e-56	5.99204e-59	-0.615532	0.000367425	4.82068e-05
ENSG00000182263	FIGN	2	163593396	163736012	-0.492274	3.09613e-08	3.15962e-09	-0.615666	7.35541e-06	5.52369e-07
ENSG00000103995	CEP152	15	48712928	48811146	-0.40373	0.000120578	2.43968e-05	-0.616092	1.18197e-05	9.4842e-07
ENSG00000168000	BSCL2	11	62690275	62709845	-0.750729	7.54127e-08	8.17501e-09	-0.616514	4.99071e-05	4.80628e-06
ENSG00000168824	NSG1	4	4348140	4419058	-0.777343	2.51179e-13	1.34932e-14	-0.616806	0.0339704	0.0112125
ENSG00000247572	CKMT2-AS1	5	81201341	81301565	-0.578376	1.54171e-09	1.3204e-10	-0.618063	0.000221637	2.63607e-05
ENSG00000057704	TMCC3	12	94567122	94650557	-0.714882	2.82149e-14	1.37728e-15	-0.618414	4.53751e-05	4.32315e-06
ENSG00000112984	KIF20A	5	138178719	138187723	-0.254729	0.0162383	0.0060448	-0.621357	1.08752e-06	6.34249e-08
ENSG00000146574	CCZ1B	7	6794134	6826770	-1.35086	2.70331e-62	1.13046e-64	-0.623277	2.55946e-06	1.66716e-07
ENSG00000196456	ZNF775	7	150368790	150398630	-0.523484	5.66526e-07	7.04797e-08	-0.625396	7.10049e-05	7.20893e-06
ENSG00000084636	COL16A1	1	31652263	31704319	-0.559451	2.60804e-06	3.63679e-07	-0.626215	7.8205e-05	8.0699e-06
ENSG00000107438	PDLIM1	10	95237572	95291012	-0.36961	1.58031e-16	6.07471e-18	-0.626383	1.26725e-16	1.1432e-18
ENSG00000176485	PLAAT3	11	63573195	63616883	0.645503	3.70243e-10	2.95854e-11	-0.626956	2.52033e-05	2.17989e-06
ENSG00000117280	RAB29	1	205767986	205775482	-0.433875	0.00146224	0.000385109	-0.628501	0.000425849	5.71865e-05
ENSG00000115828	QPCT	2	37342827	37373322	0.424955	2.1675e-06	2.95972e-07	-0.62946	1.00385e-06	5.73537e-08
ENSG00000157445	CACNA2D3	3	54122547	55074557	-0.355902	0.00678856	0.00221918	-0.637	3.52251e-05	3.24181e-06
ENSG00000153814	JAZF1	7	27830573	28180795	-0.590898	2.96291e-15	1.31526e-16	-0.638085	5.33342e-06	3.84803e-07
ENSG00000116883	RP11-268J15.5	1	36789335	36794822	-0.556175	9.34544e-06	1.47221e-06	-0.639797	0.00161521	0.000275443
ENSG00000285589	AC010422.8	19	12668071	12681834	-0.99553	7.95755e-13	4.52432e-14	-0.641984	0.00898705	0.00218542
ENSG00000197296	FITM2	20	44302840	44311202	-0.549347	1.66932e-08	1.62972e-09	-0.646344	4.59022e-06	3.25823e-07
ENSG00000248508	SRP14-AS1	15	40039242	40076539	-0.490757	5.68462e-05	1.07064e-05	-0.646869	0.0137528	0.00363165
ENSG00000003989	SLC7A2	8	17497088	17570573	-0.424891	0.000470516	0.000108822	-0.647004	1.39186e-13	2.0156e-15
ENSG00000109854	HTATIP2	11	20363685	20383783	-0.289147	4.49231e-06	6.58944e-07	-0.648207	1.29343e-07	5.90575e-09
ENSG00000103742	IGDCC4	15	65381484	65422947	-0.39267	1.40086e-05	2.28689e-06	-0.648762	2.50304e-05	2.16295e-06
ENSG00000080298	RFX3	9	3218297	3526004	-0.38228	0.00219234	0.000605779	-0.650674	0.000805043	0.000120339
ENSG00000073605	GSDMB	17	39904595	39919854	-0.330871	0.00642957	0.00207752	-0.650824	0.00470939	0.00100265
ENSG00000023608	SNAPC1	14	61762420	61796428	-0.286828	0.0449223	0.0195549	-0.65893	0.00275053	0.000525423
ENSG00000162604	TM2D1	1	61681046	61725423	-0.360854	2.29199e-05	3.92411e-06	-0.659703	5.37448e-07	2.89627e-08
ENSG00000183840	GPR39	2	132416805	132646582	-0.703324	3.02549e-28	5.13372e-30	-0.661813	3.68152e-05	3.4072e-06
ENSG00000134013	LOXL2	8	23296897	23425328	-0.396422	8.74982e-12	5.67841e-13	-0.662234	5.35048e-14	7.07075e-16
ENSG00000095777	MYO3A	10	25934229	26212532	-0.603612	1.85668e-18	6.09189e-20	-0.663038	5.77576e-13	9.14104e-15
ENSG00000232063	AL691447.2	9	94332459	94363013	-0.859053	8.79666e-09	8.26257e-10	-0.663468	0.000202102	2.36215e-05
ENSG00000097096	SYDE2	1	85156889	85201016	-0.839598	5.15661e-22	1.22747e-23	-0.664947	1.69049e-06	1.05279e-07
ENSG00000144645	OSBPL10	3	31657890	32077580	-0.407517	4.79174e-09	4.34208e-10	-0.670362	2.99499e-06	2.02162e-07
ENSG00000067082	KLF6	10	3775996	3785281	-0.666995	1.65768e-24	3.47933e-26	-0.672461	1.87098e-23	8.43915e-26
ENSG00000270804	AC010326.5	19	57867885	57868834	-0.436174	0.000102093	2.02461e-05	-0.672697	0.00402948	0.00083429
ENSG00000099725	PRKY	Y	7273972	7381548	-0.423052	3.40854e-06	4.88187e-07	-0.674201	9.24998e-12	1.76406e-13
ENSG00000120875	DUSP4	8	29333064	29350684	-0.340435	4.60565e-15	2.07782e-16	-0.676735	2.52489e-14	3.19682e-16
ENSG00000079156	OSBPL6	2	178194481	178402893	-0.591186	1.96387e-11	1.34083e-12	-0.677975	1.72914e-14	2.14825e-16
ENSG00000171617	ENC1	5	74627406	74641424	0.376366	0.0103712	0.00361469	-0.680128	2.28669e-15	2.53332e-17
ENSG00000050767	COL23A1	5	178237618	178590393	-0.355989	1.45886e-05	2.38862e-06	-0.682193	6.64903e-08	2.89912e-09
ENSG00000125430	HS3ST3B1	17	14301081	14349404	-0.533754	3.11764e-10	2.4545e-11	-0.682936	4.38647e-06	3.09278e-07
ENSG00000172175	MALT1	18	58671465	58754477	-0.542283	1.37284e-16	5.22199e-18	-0.683004	2.65446e-15	3.00378e-17
ENSG00000158711	ELK4	1	205597556	205632011	-0.300507	0.00876632	0.00297569	-0.685789	0.000777768	0.000115361
ENSG00000197563	PIGN	18	61905255	62187118	-0.367689	3.26645e-09	2.89738e-10	-0.686576	1.54043e-10	3.79104e-12
ENSG00000152217	SETBP1	18	44680173	45068510	-0.596492	5.39376e-17	1.97793e-18	-0.687542	8.77533e-09	3.10404e-10
ENSG00000279041	AC102945.2	8	30552345	30553766	-0.537505	1.95624e-05	3.30051e-06	-0.688093	1.0493e-05	8.23694e-07
ENSG00000162636	FAM102B	1	108560089	108644900	-0.609849	3.01533e-09	2.66009e-10	-0.688714	1.08201e-14	1.30145e-16
ENSG00000156110	ADK	10	74151202	74709963	-0.253854	0.00500081	0.00155956	-0.69042	1.52534e-12	2.60722e-14
ENSG00000132205	EMILIN2	18	2847006	2916003	-0.43217	9.44101e-05	1.86011e-05	-0.693189	0.000460799	6.26456e-05
ENSG00000133104	SPART	13	36301638	36370180	-0.386076	7.44059e-07	9.478e-08	-0.69347	1.5143e-15	1.62499e-17
ENSG00000276644	DACH1	13	71437966	71867204	-0.335903	0.0136177	0.00494444	-0.694998	0.000926026	0.000142161
ENSG00000163710	PCOLCE2	3	142815922	142889206	-0.876612	8.77687e-23	2.00453e-24	-0.696603	5.3875e-05	5.24383e-06
ENSG00000130159	ECSIT	19	11505929	11529172	-0.284571	0.00388444	0.00116674	-0.697798	8.77308e-08	3.92244e-09
ENSG00000137834	SMAD6	15	66702236	66782849	-1.07257	2.50682e-18	8.30568e-20	-0.697997	7.35078e-06	5.51439e-07
ENSG00000196569	LAMA2	6	128883141	129516569	-0.520338	1.80572e-06	2.43522e-07	-0.698067	6.17792e-05	6.17449e-06
ENSG00000156869	FRRS1	1	99708632	99766631	-0.987839	1.20638e-30	1.80447e-32	-0.699162	7.65677e-11	1.78135e-12
ENSG00000156381	ANKRD9	14	102501767	102509799	-0.642785	1.08777e-15	4.50728e-17	-0.699591	1.91543e-11	3.97123e-13
ENSG00000085465	OVGP1	1	111414319	111427735	-0.671022	0.00024915	5.39774e-05	-0.700131	0.00525958	0.00114664
ENSG00000196139	AKR1C3	10	5035354	5107686	1.04507	2.55342e-15	1.12117e-16	-0.701065	0.00487299	0.00104385
ENSG00000140795	MYLK3	16	46702282	46790407	-0.99691	1.46035e-12	8.54953e-14	-0.701448	6.67387e-05	6.71243e-06
ENSG00000254088	SLC2A3P4	8	86503591	86505061	-1.01592	3.77391e-06	5.44462e-07	-0.701477	0.00110837	0.000176293
ENSG00000162931	TRIM17	1	228407935	228416861	-0.594915	4.83742e-07	5.94806e-08	-0.702673	4.44831e-05	4.22853e-06
ENSG00000134352	IL6ST	5	55935095	55995022	-0.528622	1.56112e-18	5.07192e-20	-0.704026	8.45309e-14	1.16913e-15
ENSG00000260852	FBXL19-AS1	16	30919319	30923269	-0.722649	1.23182e-07	1.37496e-08	-0.705093	4.56423e-05	4.35222e-06
ENSG00000142089	IFITM3	11	319676	327537	-0.553057	1.48842e-07	1.69131e-08	-0.707031	6.37369e-13	1.02387e-14
ENSG00000101680	LAMA1	18	6941742	7117797	-0.352103	1.64817e-08	1.60775e-09	-0.717182	2.47825e-11	5.27537e-13
ENSG00000251408	AC113615.1	4	6202328	6206649	-0.820279	7.14289e-14	3.63607e-15	-0.725576	1.17661e-05	9.4152e-07
ENSG00000231991	ANXA2P2	9	33624274	33625293	-0.604215	0.0173218	0.00651499	-0.727244	0.00420642	0.000879097
ENSG00000132669	RIN2	20	19757606	20002459	-0.987518	2.16902e-18	7.15157e-20	-0.729028	3.01405e-07	1.51454e-08
ENSG00000214548	MEG3	14	100779410	100861031	-3.19357	5.34323e-07	6.60867e-08	-0.731533	0.00938026	0.00229886
ENSG00000117616	RSRP1	1	25242249	25338213	-0.712559	1.69271e-26	3.14448e-28	-0.734447	3.98954e-18	3.4096e-20
ENSG00000137948	BRDT	1	91949371	92014426	-0.718294	2.14114e-12	1.28107e-13	-0.734786	0.0332352	0.0108703
ENSG00000140835	CHST4	16	71525233	71538746	-2.56988	8.74822e-43	7.66832e-45	-0.73673	0.0214378	0.00631581
ENSG00000279355	AGPAT4-IT1	6	161160114	161161982	-0.646275	0.00337556	0.000990951	-0.737047	1.15614e-05	9.21292e-07
ENSG00000129295	LRRC6	8	132570416	132675592	-0.479102	7.34193e-06	1.12889e-06	-0.737667	1.47188e-06	8.99179e-08
ENSG00000106018	VIPR2	7	159028175	159144867	-0.763652	7.39617e-13	4.19325e-14	-0.738012	0.00794509	0.00189055
ENSG00000112697	TMEM30A	6	75252924	75284948	-0.893849	1.26827e-28	2.14182e-30	-0.738043	2.11651e-08	8.19002e-10
ENSG00000277352	AP001065.4	21	44494874	44495519	-0.463706	0.0497938	0.0221319	-0.74162	0.0423826	0.0147771
ENSG00000177576	C18orf32	18	49477250	49487252	-0.635464	4.45224e-07	5.4279e-08	-0.744968	2.90488e-06	1.93321e-07
ENSG00000166343	MSS51	10	73423579	73433561	-0.44804	0.00552781	0.00175014	-0.745363	0.0074124	0.00173451
ENSG00000180616	SSTR2	17	73165010	73176633	-0.595498	1.5581e-15	6.61584e-17	-0.746072	2.91903e-08	1.16419e-09
ENSG00000250067	YJEFN3	19	19528861	19537581	-0.633491	9.50324e-05	1.87314e-05	-0.746417	1.79858e-06	1.12723e-07
ENSG00000204305	AGER	6	32180968	32184322	-0.511972	6.54811e-07	8.25689e-08	-0.748963	4.87954e-14	6.40977e-16
ENSG00000090013	BLVRB	19	40447765	40465764	-0.368981	0.000115226	2.31935e-05	-0.756002	3.39763e-06	2.32298e-07
ENSG00000261490	AC005674.2	4	10068089	10073019	-0.966635	3.70243e-10	2.95956e-11	-0.75821	0.000471069	6.42282e-05
ENSG00000230074	AL162231.2	9	34665607	34681981	-0.866442	2.25587e-16	8.83482e-18	-0.758441	0.0149949	0.00404287
ENSG00000204172	AGAP9	10	47501854	47523638	-0.903807	2.65392e-11	1.85465e-12	-0.758681	5.38437e-05	5.23652e-06
ENSG00000198468	FLVCR1-DT	1	212852105	212858126	-0.360397	9.55616e-05	1.8851e-05	-0.761128	0.000105519	1.12975e-05
ENSG00000186010	NDUFA13	19	19515736	19529054	-0.690663	1.40923e-05	2.30395e-06	-0.767759	2.02337e-05	1.71803e-06
ENSG00000183273	CCDC60	12	119334712	119541040	-1.07335	0.00182859	0.00049483	-0.769767	6.08473e-05	6.04765e-06
ENSG00000121236	TRIM6	11	5596109	5612958	-0.816797	4.86578e-19	1.4791e-20	-0.771853	1.78747e-16	1.64079e-18
ENSG00000105552	BCAT2	19	48795062	48811029	-0.408257	3.20557e-07	3.80493e-08	-0.772766	3.50393e-19	2.63412e-21
ENSG00000255031	AP002807.1	11	68050740	68053762	-0.414168	0.00110088	0.000280466	-0.77502	8.07848e-08	3.58632e-09
ENSG00000188177	ZC3H6	2	112275597	112340063	-0.468531	4.79439e-06	7.08267e-07	-0.778488	0.0346521	0.0114922
ENSG00000138193	PLCE1	10	94030812	94332823	-0.513581	7.6649e-20	2.2067e-21	-0.778673	2.20184e-22	1.08027e-24
ENSG00000198910	L1CAM	X	153861514	153886173	-0.257788	0.000912449	0.000228351	-0.782548	1.7727e-12	3.05808e-14
ENSG00000181029	TRAPPC5	19	7680833	7687703	-0.572503	0.00232728	0.000648681	-0.783944	0.00122041	0.000196626
ENSG00000135596	MICAL1	6	109444062	109465968	-0.292615	0.000134915	2.75472e-05	-0.785385	2.69411e-22	1.36443e-24
ENSG00000174738	NR1D2	3	23945286	23980617	-0.375541	0.0124756	0.00445251	-0.789365	0.00267239	0.000505421
ENSG00000078295	ADCY2	5	7396138	7830081	0.385591	7.68079e-07	9.81486e-08	-0.792929	0.000440634	5.95555e-05
ENSG00000168621	GDNF	5	37812677	37840041	-1.52584	3.13983e-23	6.94373e-25	-0.796821	1.94649e-06	1.23533e-07
ENSG00000099377	HSD3B7	16	30985207	30989147	-0.768099	1.60006e-06	2.1347e-07	-0.797852	2.8168e-05	2.49872e-06
ENSG00000091129	NRCAM	7	108147623	108456717	-0.482303	0.000260877	5.66858e-05	-0.79845	0.0155179	0.00423037
ENSG00000188856	RPSAP47	8	80558870	80559757	-1.26395	5.58072e-21	1.48101e-22	-0.800202	1.24616e-09	3.64865e-11
ENSG00000156509	FBXO43	8	100133351	100145817	-0.301551	0.0145528	0.00533894	-0.800644	0.000154942	1.75209e-05
ENSG00000268575	AL031282.2	1	1702736	1737688	-0.568267	3.343e-06	4.78263e-07	-0.803645	0.00361107	0.00073153
ENSG00000178568	ERBB4	2	211375717	212538841	-0.97626	1.16902e-47	8.2729e-50	-0.804587	1.25466e-11	2.43248e-13
ENSG00000042493	CAPG	2	85394753	85418432	-0.31332	5.30712e-07	6.55974e-08	-0.808196	2.12715e-13	3.19821e-15
ENSG00000162552	WNT4	1	22117313	22143969	0.399128	0.00330474	0.000967106	-0.808739	0.0142266	0.00378377
ENSG00000164318	EGFLAM	5	38258409	38465480	-0.754711	5.91187e-13	3.31369e-14	-0.808983	0.000286719	3.5803e-05
ENSG00000229256	ST13P13	10	103215709	103216800	-1.55968	1.37244e-20	3.73048e-22	-0.813775	0.000224325	2.67337e-05
ENSG00000066739	ATG2B	14	96279195	96363341	-1.28498	1.08387e-89	2.44056e-92	-0.82024	7.84644e-15	9.18947e-17
ENSG00000137449	CPEB2	4	15002674	15070153	-0.985389	7.29509e-25	1.50771e-26	-0.820857	1.63205e-09	4.97222e-11
ENSG00000149294	NCAM1	11	112961247	113278436	0.58311	3.4613e-12	2.14052e-13	-0.821089	0.0017308	0.000300359
ENSG00000065621	GSTO2	10	104268873	104304950	-0.941164	0.0219703	0.00861675	-0.821158	0.000169238	1.94188e-05
ENSG00000260266	PPIAP46	15	74350768	74364620	-0.672807	8.33267e-35	9.91745e-37	-0.822048	1.38856e-09	4.12051e-11
ENSG00000164142	FAM160A1	4	151409176	151670503	-0.636449	5.89746e-10	4.87542e-11	-0.822073	0.000904164	0.000137589
ENSG00000251364	AC107884.1	11	7418826	7513644	-0.908134	4.30656e-17	1.55847e-18	-0.824806	0.0277466	0.0086292
ENSG00000073464	CLCN4	X	10156945	10237660	-0.344909	5.14437e-05	9.58959e-06	-0.829004	5.43337e-12	9.88902e-14
ENSG00000164463	CREBRF	5	173056352	173139284	-0.588976	5.7506e-06	8.64787e-07	-0.830364	0.00129275	0.000210429
ENSG00000128342	LIF	22	30240453	30246759	-0.312232	0.0306461	0.0125887	-0.830662	5.46171e-05	5.34199e-06
ENSG00000152137	HSPB8	12	119178642	119221131	-0.851975	0.0139097	0.00506947	-0.831199	1.07105e-19	7.28895e-22
ENSG00000117620	SLC35A3	1	99969351	100035634	-0.765046	1.62131e-40	1.59067e-42	-0.832878	4.26455e-25	1.68733e-27
ENSG00000203875	SNHG5	6	85650491	85678932	-0.339621	5.40896e-07	6.69867e-08	-0.834137	4.20152e-07	2.19768e-08
ENSG00000013441	CLK1	2	200853009	200864744	-0.895995	3.63425e-09	3.23531e-10	-0.835736	1.86985e-08	7.08757e-10
ENSG00000213398	LCAT	16	67939750	67944131	-0.500383	1.01656e-05	1.60884e-06	-0.839969	7.54284e-11	1.74887e-12
ENSG00000162461	SLC25A34	1	15736258	15741392	-1.66739	1.30051e-11	8.64914e-13	-0.840728	0.00086457	0.000130537
ENSG00000101076	HNF4A	20	44355700	44434596	-1.25838	5.04248e-58	2.6358e-60	-0.842854	1.05541e-05	8.29327e-07
ENSG00000233016	SNHG7	9	136721366	136728184	-1.44112	1.40571e-47	1.0061e-49	-0.847913	5.39296e-21	3.15802e-23
ENSG00000235946	H2BW3P	X	104062542	104063037	-0.421453	0.00306663	0.000887312	-0.849746	4.78837e-06	3.42919e-07
ENSG00000125257	ABCC4	13	95019835	95301475	-1.03186	4.71991e-58	2.42923e-60	-0.850353	5.58974e-11	1.24737e-12
ENSG00000213199	ASIC3	7	151048292	151052756	-0.473521	0.0148891	0.00548389	-0.852854	8.4272e-07	4.72809e-08
ENSG00000267283	AC005306.1	19	1989401	1990370	-1.1991	1.52188e-16	5.83785e-18	-0.855377	0.00104391	0.000164306
ENSG00000233223	AC016876.2	17	7581964	7584086	-0.448361	0.00164171	0.00043779	-0.859146	7.23419e-05	7.3733e-06
ENSG00000184344	GDF3	12	7689784	7695775	-1.40595	4.09645e-21	1.07723e-22	-0.860158	0.0245266	0.00743591
ENSG00000147862	NFIB	9	14081843	14398983	-0.459634	2.20503e-05	3.75396e-06	-0.862642	1.08666e-07	4.91866e-09
ENSG00000090661	CERS4	19	8206736	8262421	-0.81479	1.19316e-42	1.05547e-44	-0.865146	6.04552e-12	1.11945e-13
ENSG00000197258	EIF4BP6	7	104667749	104669576	-0.886926	0.000124006	2.51503e-05	-0.867055	0.000317378	4.06397e-05
ENSG00000220323	H2BC19P	1	149842875	149846486	-1.04512	4.44917e-16	1.78181e-17	-0.868181	2.73376e-05	2.40126e-06
ENSG00000115232	ITGA4	2	181457202	181538940	-0.818618	7.80638e-12	4.99081e-13	-0.870092	5.76729e-06	4.19893e-07
ENSG00000131480	AOC2	17	42844580	42850707	-0.611153	2.32762e-08	2.32294e-09	-0.870453	5.73318e-08	2.43173e-09
ENSG00000136842	TMOD1	9	97501180	97601743	-0.78349	1.96179e-52	1.199e-54	-0.872936	6.67002e-34	1.47789e-36
ENSG00000187688	TRPV2	17	16415571	16437003	-0.536516	6.21163e-06	9.41111e-07	-0.874911	1.29871e-09	3.82307e-11
ENSG00000137496	IL18BP	11	71998613	72005715	-0.68146	2.42553e-11	1.68529e-12	-0.87509	2.00965e-15	2.2105e-17
ENSG00000259005	AC005479.1	14	74474007	74474864	-1.06918	6.12863e-15	2.81419e-16	-0.875556	3.51619e-06	2.4096e-07
ENSG00000049769	PPP1R3F	X	49269793	49301461	-0.280067	0.00082916	0.000205773	-0.87884	5.06738e-07	2.71816e-08
ENSG00000235823	OLMALINC	10	100373099	100454043	-0.676373	2.72066e-33	3.56629e-35	-0.887744	8.68347e-06	6.63783e-07
ENSG00000059804	SLC2A3	12	7919230	7936187	-1.09191	4.31596e-77	1.35362e-79	-0.889071	1.53927e-21	8.52648e-24
ENSG00000169126	ARMC4	10	27775186	27999079	-0.856023	7.66067e-17	2.85235e-18	-0.890035	7.03745e-15	8.18632e-17
ENSG00000104327	CALB1	8	90058608	90095475	-0.678321	1.52118e-18	4.9177e-20	-0.893483	2.469e-09	7.75654e-11
ENSG00000274265	AC245297.4	1	149175748	149259987	-1.25624	3.44259e-39	3.62669e-41	-0.893537	3.09765e-09	9.92759e-11
ENSG00000261087	ZNNT1	8	101166805	101169629	-0.980396	8.2915e-09	7.74807e-10	-0.893594	6.27092e-05	6.27737e-06
ENSG00000005020	SKAP2	7	26667068	26995239	-0.481715	0.000827217	0.000205224	-0.894515	3.14758e-07	1.58954e-08
ENSG00000100625	SIX4	14	60709539	60724351	-0.520744	1.12587e-08	1.07337e-09	-0.903776	2.09418e-13	3.13207e-15
ENSG00000104447	TRPS1	8	115408496	115809673	-0.366638	0.0038645	0.00115888	-0.905223	2.20151e-08	8.58861e-10
ENSG00000260563	AC132872.1	17	82293716	82294910	-0.362493	0.0172572	0.00648377	-0.918149	0.000283102	3.52393e-05
ENSG00000104518	GSDMD	8	143553207	143563062	-0.952491	5.86695e-17	2.17032e-18	-0.921936	5.95571e-08	2.54049e-09
ENSG00000183506	PI4KAP2	22	21473000	21517533	-0.448487	4.06297e-05	7.37444e-06	-0.924705	1.62309e-11	3.28806e-13
ENSG00000239713	APOBEC3G	22	39077067	39087743	-0.597185	6.43958e-26	1.26652e-27	-0.926162	1.01535e-21	5.46363e-24
ENSG00000120279	MYCT1	6	152697895	152724567	-0.98697	1.69384e-38	1.85253e-40	-0.932381	2.97146e-06	1.99399e-07
ENSG00000100767	PAPLN	14	73237497	73274640	-0.736825	2.36914e-15	1.03454e-16	-0.934734	1.984e-10	4.99259e-12
ENSG00000188818	ZDHHC11	5	795606	850986	-1.26483	1.381e-25	2.74313e-27	-0.936881	6.13596e-13	9.75966e-15
ENSG00000154310	TNIK	3	171058414	171460408	-0.352708	0.0143423	0.00525251	-0.93798	1.02879e-05	8.0597e-07
ENSG00000253217	AP001574.1	8	100337595	100350707	-1.14943	2.73757e-19	8.23361e-21	-0.940247	2.92776e-06	1.95076e-07
ENSG00000125378	BMP4	14	53949736	53958761	-0.8094	3.1898e-15	1.42624e-16	-0.944773	1.22491e-10	2.95637e-12
ENSG00000197721	CR1L	1	207645113	207738416	-0.556616	1.24665e-07	1.39352e-08	-0.94661	8.14955e-10	2.27003e-11
ENSG00000133739	LRRCC1	8	85107215	85146080	-1.04851	1.50752e-41	1.43054e-43	-0.950243	5.25143e-15	6.06717e-17
ENSG00000283930	AL117339.5	10	38094368	38360098	-0.954091	3.21473e-08	3.29585e-09	-0.950908	1.23422e-05	9.99136e-07
ENSG00000182472	CAPN12	19	38730187	38769904	-0.400199	0.00178407	0.000481324	-0.953472	7.32011e-06	5.4856e-07
ENSG00000184304	PRKD1	14	29576479	30191898	-0.407399	1.67831e-08	1.63985e-09	-0.953643	5.18702e-19	3.98149e-21
ENSG00000147437	GNRH1	8	25419258	25424654	-0.780658	1.35099e-08	1.30373e-09	-0.955151	1.43003e-06	8.71346e-08
ENSG00000242028	HYPK	15	43796142	43803043	-0.638392	5.42794e-05	1.01968e-05	-0.961784	3.53756e-05	3.25846e-06
ENSG00000175928	LRRN1	3	3799431	3849834	-0.301785	0.0292833	0.0119276	-0.96182	1.38691e-13	1.98648e-15
ENSG00000120457	KCNJ5	11	128891356	128921163	0.502947	0.00258023	0.000730599	-0.964412	4.89461e-05	4.69049e-06
ENSG00000164692	COL1A2	7	94394895	94431227	0.278767	0.0299629	0.0122695	-0.964959	1.89854e-10	4.74747e-12
ENSG00000074410	CA12	15	63321378	63381846	0.798773	0.00122398	0.000316355	-0.965557	0.00469914	0.000999175
ENSG00000101871	MID1	X	10445310	10833654	-0.479285	3.50013e-08	3.6282e-09	-0.988915	1.79767e-11	3.71285e-13
ENSG00000101282	RSPO4	20	958452	1002311	-0.787432	1.92065e-13	1.02095e-14	-0.992123	1.53967e-09	4.65423e-11
ENSG00000243811	APOBEC3D	22	39021113	39033277	-0.545497	1.08894e-05	1.73215e-06	-0.99434	1.3992e-11	2.75699e-13
ENSG00000228084	AC118553.1	1	99968383	99969864	-0.892925	3.0297e-09	2.6752e-10	-0.99455	0.000120711	1.31916e-05
ENSG00000168004	PLAAT5	11	63461404	63491194	-0.8531	5.05597e-29	8.25381e-31	-1.01046	5.75253e-33	1.36564e-35
ENSG00000121716	PILRB	7	100352176	100367733	-0.543958	0.00192477	0.000523894	-1.01504	0.00493928	0.0010604
ENSG00000171310	CHST11	12	104455295	104762014	-0.311463	0.000909562	0.000227482	-1.01529	1.23175e-40	1.55955e-43
ENSG00000244879	GABPB1-AS1	15	50354959	50372202	-0.311069	0.00848148	0.00286058	-1.01948	1.00087e-05	7.81723e-07
ENSG00000214110	LDHAP4	9	14921337	14922334	0.562716	7.35676e-05	1.41337e-05	-1.02085	0.0355575	0.0118769
ENSG00000075673	ATP12A	13	24680411	24712493	0.387645	0.000136077	2.78282e-05	-1.02269	2.59531e-13	3.96371e-15
ENSG00000278978	RP11-164P12.5	4	151669786	151670503	-0.74604	5.16654e-06	7.65737e-07	-1.03118	0.00204209	0.000367469
ENSG00000112041	TULP1	6	35497874	35512896	0.359982	0.0247754	0.00987231	-1.03568	0.000460397	6.25545e-05
ENSG00000248587	GDNF-AS1	5	37811589	37953827	-1.29468	4.8335e-33	6.3747e-35	-1.04167	1.65056e-14	2.02451e-16
ENSG00000138080	EMILIN1	2	27078615	27086403	-0.866145	4.21396e-05	7.67561e-06	-1.04575	0.000681923	9.9021e-05
ENSG00000221994	ZNF630	X	47983356	48071658	-0.967751	1.39953e-26	2.5886e-28	-1.04847	1.01391e-12	1.67688e-14
ENSG00000049089	COL9A2	1	40300489	40317813	-0.766327	1.29496e-11	8.60183e-13	-1.05433	1.67109e-16	1.52074e-18
ENSG00000189337	KAZN	1	13892792	15118043	-0.306065	0.00440437	0.00134582	-1.05478	1.78425e-11	3.671e-13
ENSG00000255389	Z97989.1	6	111599875	111602295	-0.418618	0.00387694	0.00116417	-1.0619	0.000191704	2.2209e-05
ENSG00000261325	LINC02192	16	47849314	47887130	-1.37836	8.71461e-12	5.64855e-13	-1.06268	7.55098e-05	7.74924e-06
ENSG00000164393	ADGRF2	6	47656436	47697797	-0.270728	0.0252047	0.0100636	-1.06483	1.03126e-08	3.72942e-10
ENSG00000136574	GATA4	8	11676959	11760002	-1.08456	1.59767e-19	4.71906e-21	-1.06966	1.75792e-08	6.6494e-10
ENSG00000139364	TMEM132B	12	125186836	125662377	0.271295	0.019537	0.00749116	-1.07207	2.27172e-10	5.82447e-12
ENSG00000183891	TTC32	2	19896631	19901983	-0.400049	0.000476581	0.000110466	-1.07715	2.26876e-08	8.86896e-10
ENSG00000093072	ADA2	22	17178790	17258235	0.849849	6.43958e-26	1.26557e-27	-1.07892	3.23429e-05	2.93561e-06
ENSG00000173451	THAP2	12	71664301	71680644	-0.854667	1.35217e-12	7.87272e-14	-1.0819	2.1347e-08	8.27732e-10
ENSG00000280099	AL603750.1	1	85152487	85154203	-1.40428	5.23156e-23	1.16958e-24	-1.08233	1.32577e-08	4.86791e-10
ENSG00000174827	PDZK1	1	145670852	145708148	-1.30187	1.061e-47	7.42316e-50	-1.08476	8.71055e-14	1.21315e-15
ENSG00000199145	MIR302D	4	112648004	112648071	-1.46644	7.67599e-07	9.80255e-08	-1.08482	1.72662e-05	1.44283e-06
ENSG00000117834	SLC5A9	1	48222685	48248644	-0.610137	3.45908e-17	1.24622e-18	-1.08499	6.17592e-07	3.36726e-08
ENSG00000234745	HLA-B	6	31269491	31357188	-3.02587	2.15372e-168	1.55878e-171	-1.08624	0.0068784	0.00158258
ENSG00000224546	EIF4BP3	9	96146007	96147856	-1.18345	4.61769e-40	4.64183e-42	-1.11545	3.30562e-08	1.33669e-09
ENSG00000199102	MIR302C	4	112648363	112648430	-1.32436	9.02671e-09	8.50042e-10	-1.12386	1.02063e-07	4.59554e-09
ENSG00000134107	BHLHE40	3	4979437	4985323	-0.562583	0.0118597	0.00420979	-1.12601	0.0031457	0.000619331
ENSG00000131471	AOC3	17	42851184	42858130	-0.784899	5.42476e-06	8.09771e-07	-1.12823	2.22496e-09	6.97226e-11
ENSG00000242715	CCDC169	13	36222008	36297840	-0.620023	5.27919e-09	4.81432e-10	-1.14224	9.74116e-07	5.54237e-08
ENSG00000106404	CLDN15	7	101232092	101238820	-0.691385	1.55726e-08	1.51531e-09	-1.15079	2.59712e-14	3.30882e-16
ENSG00000261578	AP003119.3	11	76800364	76804555	-1.84008	3.04627e-37	3.42966e-39	-1.15252	0.000310931	3.94907e-05
ENSG00000117245	KIF17	1	20664014	20718017	-1.30128	5.56751e-25	1.13723e-26	-1.15776	0.00348224	0.00069744
ENSG00000211451	GNRHR2	1	145919013	145925341	-0.601406	1.8564e-05	3.10818e-06	-1.15939	5.18482e-06	3.71788e-07
ENSG00000166394	CYB5R2	11	7665100	7677222	-0.524087	4.02031e-09	3.59839e-10	-1.17211	5.33154e-28	1.72979e-30
ENSG00000152583	SPARCL1	4	87473335	87531061	0.309563	0.0442941	0.0192564	-1.17801	0.00272097	0.000516977
ENSG00000125462	C1orf61	1	156404250	156456763	-1.14051	2.65414e-26	5.10124e-28	-1.18208	1.27996e-09	3.75773e-11
ENSG00000227740	LINC02803	1	175904762	175921057	-0.901467	8.19218e-15	3.81445e-16	-1.2036	1.22798e-14	1.48676e-16
ENSG00000187984	ANKRD19P	9	92809568	92838457	-1.83405	1.18002e-32	1.57526e-34	-1.20391	0.00238022	0.000439806
ENSG00000271815	AC008897.3	5	75363760	75364242	-0.811015	0.000434499	9.97233e-05	-1.21455	7.14004e-05	7.26039e-06
ENSG00000206503	HLA-A	6	29941260	29945884	0.903736	2.92892e-74	1.01282e-76	-1.21657	0.0127051	0.00329767
ENSG00000183378	OVCH2	11	7689437	7706421	-0.463874	2.21153e-05	3.76858e-06	-1.21773	7.61884e-20	5.06435e-22
ENSG00000215784	FAM72D	1	145095974	145112696	-0.662279	2.09348e-06	2.85023e-07	-1.22709	4.92937e-07	2.6213e-08
ENSG00000172578	KLHL6	3	183487551	183555706	0.257358	0.00917046	0.0031313	-1.23602	8.8477e-06	6.78438e-07
ENSG00000177398	UMODL1	21	42062959	42143453	-0.569507	5.47473e-18	1.84032e-19	-1.23836	2.85237e-05	2.53253e-06
ENSG00000152208	GRID2	4	92303966	93810157	-2.5548	6.62752e-108	1.17254e-110	-1.24196	3.01978e-06	2.04075e-07
ENSG00000185269	NOTUM	17	81952507	81961840	-0.49441	0.0145573	0.00534207	-1.24855	0.000661242	9.55166e-05
ENSG00000260276	AC022167.2	16	8848105	8860456	-1.22645	2.46704e-13	1.32131e-14	-1.25219	2.99067e-06	2.01634e-07
ENSG00000186642	PDE2A	11	72576141	72674591	-0.905585	9.11392e-12	5.94402e-13	-1.25369	0.00310549	0.000609581
ENSG00000173991	TCAP	17	39665349	39666554	-0.757793	1.27133e-05	2.04885e-06	-1.25525	6.43131e-14	8.60087e-16
ENSG00000153976	HS3ST3A1	17	13494032	13601929	-0.660156	0.0132087	0.00476407	-1.25738	0.000166351	1.9048e-05
ENSG00000138161	CUZD1	10	122832158	122846175	-0.608383	3.34346e-07	4.00892e-08	-1.27838	3.32072e-16	3.23216e-18
ENSG00000184371	CSF1	1	109910242	109930992	-0.548218	0.00066652	0.000160962	-1.28061	3.67458e-07	1.89298e-08
ENSG00000183379	SYNDIG1L	14	74405894	74426210	-0.785222	8.24726e-07	1.05984e-07	-1.28288	1.89436e-06	1.19325e-07
ENSG00000014257	ACPP	3	132317369	132368298	-0.603218	4.47152e-05	8.18789e-06	-1.28348	1.69105e-07	7.9755e-09
ENSG00000188859	FAM78B	1	166057426	166167001	-1.03803	3.47815e-21	9.06248e-23	-1.28577	3.91087e-19	2.97099e-21
ENSG00000102007	PLP2	X	49171898	49175235	-0.369729	4.78343e-05	8.82059e-06	-1.28664	2.39248e-15	2.66947e-17
ENSG00000269113	TRABD2B	1	47760528	47997385	-1.18754	9.50164e-51	6.18925e-53	-1.28916	4.32234e-20	2.83892e-22
ENSG00000258376	AC004846.1	14	73242651	73245979	-0.320384	0.0100537	0.00348463	-1.30741	1.09013e-06	6.36637e-08
ENSG00000108950	FAM20A	17	68535113	68601367	-0.640742	2.44727e-12	1.48391e-13	-1.31306	7.85264e-21	4.78478e-23
ENSG00000232110	AL353751.1	10	89283765	89292125	-0.640007	0.00953209	0.00328085	-1.35107	6.71235e-06	4.96945e-07
ENSG00000224420	ADM5	19	49688664	49690575	-0.879442	0.00012637	2.56703e-05	-1.35318	6.26654e-08	2.69763e-09
ENSG00000183569	SERHL2	22	42553617	42574382	-0.407969	0.000388435	8.78078e-05	-1.35903	7.00829e-12	1.31991e-13
ENSG00000259479	SORD2P	15	44825747	44884694	-2.01614	5.67813e-56	3.19638e-58	-1.38154	1.3556e-10	3.29325e-12
ENSG00000196126	HLA-DRB1	6	32578769	32589848	-3.10408	1.12104e-87	2.6144e-90	-1.39129	1.69551e-14	2.09305e-16
ENSG00000238077	NMNAT1P3	3	190166764	190167651	-1.38219	1.16409e-15	4.8773e-17	-1.40882	1.06939e-07	4.83201e-09
ENSG00000254721	AP000879.1	11	70206291	70207390	-0.897299	5.24734e-12	3.29567e-13	-1.43291	0.000406883	5.4221e-05
ENSG00000078053	AMPH	7	38383704	38631420	0.499073	0.0365295	0.0154255	-1.44676	6.52894e-09	2.24744e-10
ENSG00000163141	BNIPL	1	151036321	151047720	-0.770545	1.30794e-05	2.11522e-06	-1.46405	1.90496e-08	7.26589e-10
ENSG00000128438	TBC1D27P	17	16922915	16934839	-1.24475	1.71651e-12	1.0132e-13	-1.47153	1.82243e-13	2.6968e-15
ENSG00000124587	PEX6	6	42963865	42979181	-1.16034	5.8893e-77	1.89443e-79	-1.47592	6.06907e-40	8.64471e-43
ENSG00000089847	ANKRD24	19	4183354	4224814	-0.541939	0.000438843	0.000100862	-1.4796	1.32052e-07	6.0608e-09
ENSG00000010671	BTK	X	101349447	101390796	-1.53432	4.91258e-47	3.75307e-49	-1.53385	4.75769e-29	1.32721e-31
ENSG00000123080	CDKN2C	1	50960745	50974634	-1.44509	4.90844e-15	2.21837e-16	-1.5995	3.83416e-52	1.82044e-55
ENSG00000239653	PSMD6-AS2	3	64004022	64012148	-1.12847	2.50319e-14	1.21788e-15	-1.64777	1.70814e-12	2.93319e-14
ENSG00000198796	ALPK2	18	58481247	58629091	-1.17547	1.86714e-26	3.51355e-28	-1.69769	9.32872e-19	7.38207e-21
ENSG00000185201	IFITM2	11	307631	315272	-0.618826	2.32016e-12	1.39191e-13	-1.73742	1.65071e-42	1.69812e-45
ENSG00000123243	ITIH5	10	7559270	7666998	-1.03098	1.37862e-23	3.02665e-25	-1.77329	0.00019631	2.28358e-05
ENSG00000259363	AC090825.1	15	99805793	99916818	-0.938844	1.65563e-10	1.26618e-11	-1.83489	9.99874e-07	5.70475e-08
ENSG00000164619	BMPER	7	33904308	34156427	-1.51565	7.62626e-15	3.53255e-16	-1.86251	7.38676e-09	2.56531e-10
ENSG00000179761	PIPOX	17	28950513	29057216	-0.958747	3.13012e-10	2.4709e-11	-1.86471	1.83694e-34	3.92477e-37
ENSG00000104435	STMN2	8	79610814	79666175	-1.21887	5.3029e-16	2.13651e-17	-2.104	6.2292e-07	3.40124e-08
ENSG00000063015	SEZ6	17	28954901	29006440	-0.788222	1.94372e-07	2.24149e-08	-2.12373	1.21808e-18	9.92813e-21
ENSG00000131126	TEX101	19	43401496	43418597	-2.51018	3.51422e-41	3.39129e-43	-2.13211	0.00107662	0.000170477
ENSG00000187699	C2orf88	2	189879609	190203484	-2.46813	2.32881e-77	7.11659e-80	-2.28996	2.433e-07	1.20138e-08
ENSG00000164344	KLKB1	4	186208979	186258471	-4.49732	0	0	-2.69501	0.00201422	0.000361657
ENSG00000179344	HLA-DQB1	6	32659467	32668383	-12.594	0	0	-3.13112	0.00601476	0.00134507

## Sheet: X-Linked DEGS-DE
Table S7
					47,XXY Vs 46,XY			48-49,KS Vs 46,XY			Gene status
Gene stable ID	Gene name	Chromosome	Gene start (bp)	Gene end (bp)	LogFC 47,XXY Vs 46,XY	FDR	pvalue	logFC 48-49 KS Vs 46 XY	FDR	pvalue	Biallelic	Monoallelic
ENSG00000229807	XIST	X	73820649	73852723	12.7468	0	0	14.2572	0	0	Biallelic	#N/A
ENSG00000281566	AL157778.1	X	98450688	98892061	1.98109	2.10976e-26	4.02101e-28	2.87105	6.80493e-51	3.76945e-54	#N/A	Monoallelic
ENSG00000102290	PCDH11X	X	91779261	92623230	1.54762	7.8398e-22	1.89769e-23	1.84831	5.33054e-25	2.19346e-27	Biallelic	#N/A
ENSG00000006756	ARSD	X	2903972	2929349	0.890037	2.07584e-08	2.04829e-09	1.6588	8.21406e-42	9.10001e-45	Biallelic	#N/A
ENSG00000146938	NLGN4X	X	5840637	6228867	1.24931	1.38316e-53	8.2311e-56	1.51309	1.65327e-63	5.2331e-67	#N/A	Monoallelic
ENSG00000236871	LINC00106	X	1396427	1399402	0.473428	0.00176008	0.0004736	1.50454	6.14076e-09	2.08952e-10	#N/A	Monoallelic
ENSG00000186310	NAP1L3	X	93670930	93673578	0.644163	0.00168832	0.000451985	1.50316	8.45309e-14	1.1706e-15	#N/A	Monoallelic
ENSG00000236017	ASMTL-AS1	X	1401769	1414028	0.353999	0.0197634	0.00759385	1.48941	9.63337e-12	1.8448e-13	Biallelic	#N/A
ENSG00000214717	ZBED1	X	2486414	2500976	0.471538	9.60862e-14	4.92215e-15	1.32353	9.85244e-25	4.13215e-27	Biallelic	#N/A
ENSG00000077274	CAPN6	X	111245099	111270483	1.82918	9.47838e-48	6.55521e-50	1.30893	9.99021e-17	8.93324e-19	#N/A	Monoallelic
ENSG00000056998	GYG2	X	2828822	2882820	0.849728	6.42914e-41	6.25593e-43	1.26408	2.79461e-53	1.10572e-56	Biallelic	#N/A
ENSG00000182378	PLCXD1	X	276322	303356	0.795828	8.77202e-37	1.00876e-38	1.26164	9.65382e-20	6.49343e-22	Biallelic	#N/A
ENSG00000126010	GRPR	X	16123565	16153518	0.992986	6.78202e-10	5.63941e-11	1.2483	2.24888e-07	1.10513e-08	Biallelic	#N/A
ENSG00000196972	SMIM10L2B	X	135094985	135098712	0.905603	9.92296e-12	6.48763e-13	1.23573	1.47669e-09	4.41711e-11	#N/A	Monoallelic
ENSG00000169093	ASMTL	X	1403139	1453762	0.900792	6.04125e-25	1.23886e-26	1.21221	1.62542e-26	5.78806e-29	Biallelic	#N/A
ENSG00000169249	ZRSR2	X	15790472	15823260	0.741042	1.21015e-22	2.78329e-24	1.18799	1.83982e-20	1.16472e-22	Biallelic	#N/A
ENSG00000197976	AKAP17A	X	1591604	1602520	0.414256	1.58096e-09	1.36165e-10	1.18614	7.60251e-16	7.82089e-18	Biallelic	#N/A
ENSG00000225470	JPX	X	73944182	74070408	0.435879	1.38089e-11	9.19483e-13	1.13208	5.14031e-38	8.54211e-41	#N/A	Monoallelic
ENSG00000242732	RTL5	X	72127110	72131901	0.796507	1.63729e-11	1.10337e-12	1.12949	5.64142e-07	3.05352e-08	#N/A	Monoallelic
ENSG00000238178	AC078993.1	X	16152941	16170869	0.556379	5.50274e-09	5.03145e-10	0.985074	5.53536e-21	3.28521e-23	#N/A	Monoallelic
ENSG00000102096	PIM2	X	48913182	48919024	0.791699	8.45584e-61	3.87602e-63	0.94854	4.93177e-12	8.89802e-14	#N/A	Monoallelic
ENSG00000167393	PPP2R3B	X	333933	386955	0.394384	8.03837e-05	1.56566e-05	0.946606	3.12174e-10	8.17676e-12	Biallelic	#N/A
ENSG00000130021	PUDP	X	6667865	7148190	0.395609	1.57409e-06	2.09625e-07	0.925197	5.816e-23	2.71539e-25	Biallelic	#N/A
ENSG00000173698	ADGRG2	X	18989307	19122637	1.42565	4.76431e-59	2.41376e-61	0.903745	1.27239e-14	1.55059e-16	#N/A	Monoallelic
ENSG00000169297	NR0B1	X	30304206	30309390	0.502875	1.24525e-05	2.00181e-06	0.898209	1.29739e-06	7.79233e-08	#N/A	Monoallelic
ENSG00000169084	DHRSX	X	2219506	2502805	0.40518	1.21059e-12	7.00947e-14	0.837569	3.60574e-21	2.05439e-23	Biallelic	#N/A
ENSG00000169100	SLC25A6	X	1386152	1392113	0.408677	0.000215407	4.58877e-05	0.829237	4.64822e-06	3.30308e-07	Biallelic	#N/A
ENSG00000102271	KLHL4	X	87517409	87670050	0.693343	5.76668e-16	2.34655e-17	0.808055	0.00010073	1.06907e-05	Biallelic	#N/A
ENSG00000198934	MAGEE1	X	76427710	76431342	0.483468	1.7334e-10	1.32706e-11	0.805476	2.91201e-16	2.76523e-18	#N/A	Monoallelic
ENSG00000133169	BEX1	X	103062651	103064171	0.421304	0.000148324	3.0619e-05	0.787139	1.9065e-05	1.60522e-06	#N/A	Monoallelic
ENSG00000130985	UBA1	X	47190861	47215128	0.275419	1.64785e-07	1.88704e-08	0.764996	5.37492e-38	9.3573e-41	Biallelic	#N/A
ENSG00000174460	ZCCHC12	X	118823824	118826968	0.561375	1.63191e-05	2.69032e-06	0.710688	0.00141542	0.000235548	#N/A	Monoallelic
ENSG00000182287	AP1S2	X	15825806	15854931	0.568155	3.14545e-09	2.78499e-10	0.690888	9.23411e-10	2.62328e-11	#N/A	Monoallelic
ENSG00000067177	PHKA1	X	72578814	72714319	0.565843	7.54746e-11	5.60217e-12	0.657797	1.63656e-07	7.69262e-09	#N/A	Monoallelic
ENSG00000285756	BX890604.2	X	3817528	3937855	0.469537	1.44072e-08	1.39727e-09	0.626307	4.85295e-14	6.33644e-16	#N/A	Monoallelic
ENSG00000006757	PNPLA4	X	7898247	7927739	0.274476	0.00274342	0.000783644	0.61913	3.75276e-07	1.93919e-08	#N/A	Monoallelic
ENSG00000182492	BGN	X	153494980	153509546	0.419354	0.01151	0.00406899	0.608061	0.00770995	0.00182545	#N/A	Monoallelic
ENSG00000157514	TSC22D3	X	107713221	107777342	0.339727	0.000547336	0.000128482	0.555243	0.00558658	0.00123297	#N/A	Monoallelic
ENSG00000090776	EFNB1	X	68829021	68842160	0.392182	0.00864834	0.00292938	0.535515	0.0143134	0.00381592	#N/A	Monoallelic
ENSG00000130821	SLC6A8	X	153687926	153696588	0.309781	0.000178822	3.74042e-05	0.493119	7.13538e-08	3.13376e-09	#N/A	Monoallelic
ENSG00000212747	RTL8B	X	135020513	135022542	0.892607	3.29186e-12	2.03309e-13	0.48789	0.0399176	0.013706	Biallelic	#N/A
ENSG00000102317	RBM3	X	48574449	48581162	0.402421	8.54897e-17	3.21747e-18	0.476879	2.89775e-07	1.44922e-08	#N/A	Monoallelic
ENSG00000158301	GPRASP2	X	102712176	102717733	0.671931	1.62255e-17	5.75429e-19	0.4694	0.000656929	9.45599e-05	#N/A	Monoallelic
ENSG00000047230	CTPS2	X	16587999	16712936	0.411868	2.02603e-11	1.38653e-12	0.468911	6.33417e-09	2.16536e-10	#N/A	Monoallelic
ENSG00000102225	CDK16	X	47217860	47229997	0.355398	4.05227e-11	2.91659e-12	0.457753	6.34663e-11	1.43637e-12	Biallelic	#N/A
ENSG00000169895	SYAP1	X	16719612	16765340	0.287288	3.52597e-06	5.05856e-07	0.440388	3.19528e-05	2.89262e-06	Biallelic	#N/A
ENSG00000155961	RAB39B	X	155258235	155264491	0.264916	0.0318813	0.0131551	0.429033	0.00360939	0.000730047	#N/A	Monoallelic
ENSG00000089472	HEPH	X	66162549	66268867	0.606846	1.91363e-20	5.27846e-22	0.381947	0.0260657	0.00799896	#N/A	Monoallelic
ENSG00000123130	ACOT9	X	23701055	23766475	0.301689	2.74855e-06	3.86366e-07	0.35162	0.000269451	3.32843e-05	#N/A	Monoallelic
ENSG00000165195	PIGA	X	15319451	15335580	0.266118	0.00634775	0.00204598	0.334757	0.00704521	0.00162959	#N/A	Monoallelic
ENSG00000102181	CD99L2	X	150766336	150898816	0.273399	0.00120756	0.000311335	0.301201	0.00367565	0.000747812	#N/A	Monoallelic
ENSG00000123562	MORF4L2	X	103675496	103688158	0.355321	2.59491e-10	2.02418e-11	0.288504	2.84567e-06	1.87925e-07	#N/A	Monoallelic
ENSG00000147155	EBP	X	48521799	48528716	-0.274444	3.08854e-08	3.14691e-09	-0.258322	5.58873e-05	5.4795e-06	#N/A	Monoallelic
ENSG00000012211	PRICKLE3	X	49174802	49186528	-0.354734	0.0104212	0.00363381	-0.29144	0.0418037	0.0145186	#N/A	Monoallelic
ENSG00000172534	HCFC1	X	153947557	153971818	-0.28577	0.00252037	0.000711825	-0.319945	0.00529524	0.00115609	#N/A	Monoallelic
ENSG00000165359	INTS6L	X	135520643	135582510	-0.452282	7.57895e-10	6.35084e-11	-0.325717	0.00301229	0.000587453	#N/A	Monoallelic
ENSG00000177189	RPS6KA3	X	20149911	20267519	-0.315565	0.000143159	2.94492e-05	-0.368735	0.00325068	0.000642698	#N/A	Monoallelic
ENSG00000269556	TMEM185A	X	149596556	149631912	-0.350959	0.00238014	0.000665329	-0.382179	0.0006632	9.58825e-05	#N/A	Monoallelic
ENSG00000085224	ATRX	X	77504878	77786233	-0.266696	0.00448829	0.00137626	-0.3922	0.0162617	0.00448005	#N/A	Monoallelic
ENSG00000158352	SHROOM4	X	50591647	50814302	-0.61822	5.87359e-36	6.84898e-38	-0.399795	0.00248468	0.000462253	#N/A	Monoallelic
ENSG00000158813	EDA	X	69616067	70039472	-0.368948	4.64268e-06	6.83615e-07	-0.430019	0.000664886	9.62314e-05	#N/A	Monoallelic
ENSG00000232593	KANTR	X	53094145	53170914	-0.375283	0.00437393	0.00133381	-0.46974	0.0110707	0.0028095	#N/A	Monoallelic
ENSG00000165704	HPRT1	X	134460165	134520513	-0.270607	0.020844	0.0080734	-0.480476	0.000521452	7.23768e-05	#N/A	Monoallelic
ENSG00000269226	TMSB15B	X	104063871	104076212	-0.336619	0.0143274	0.0052459	-0.51222	0.00105468	0.000166419	#N/A	Monoallelic
ENSG00000158164	TMSB15A	X	102513682	102516739	0.250895	0.00847797	0.00285803	-0.513858	0.0390303	0.0133241	#N/A	Monoallelic
ENSG00000102057	KCND1	X	48961378	48971844	-0.47444	1.32316e-07	1.4865e-08	-0.524625	0.000193235	2.24069e-05	#N/A	Monoallelic
ENSG00000165288	BRWD3	X	80669503	80809877	-0.3713	5.86301e-05	1.1075e-05	-0.526059	0.0007884	0.000117352	#N/A	Monoallelic
ENSG00000171365	CLCN5	X	49922596	50099235	-1.04266	2.34802e-34	2.87012e-36	-0.594503	5.68758e-08	2.40789e-09	#N/A	Monoallelic
ENSG00000198910	L1CAM	X	153861514	153886173	-0.257788	0.000912449	0.000228351	-0.782548	1.7727e-12	3.05808e-14	#N/A	Monoallelic
ENSG00000073464	CLCN4	X	10156945	10237660	-0.344909	5.14437e-05	9.58959e-06	-0.829004	5.43337e-12	9.88902e-14	#N/A	Monoallelic
ENSG00000235946	H2BW3P	X	104062542	104063037	-0.421453	0.00306663	0.000887312	-0.849746	4.78837e-06	3.42919e-07	#N/A	Monoallelic
ENSG00000049769	PPP1R3F	X	49269793	49301461	-0.280067	0.00082916	0.000205773	-0.87884	5.06738e-07	2.71816e-08	#N/A	Monoallelic
ENSG00000101871	MID1	X	10445310	10833654	-0.479285	3.50013e-08	3.6282e-09	-0.988915	1.79767e-11	3.71285e-13	#N/A	Monoallelic
ENSG00000221994	ZNF630	X	47983356	48071658	-0.967751	1.39953e-26	2.5886e-28	-1.04847	1.01391e-12	1.67688e-14	#N/A	Monoallelic
ENSG00000102007	PLP2	X	49171898	49175235	-0.369729	4.78343e-05	8.82059e-06	-1.28664	2.39248e-15	2.66947e-17	#N/A	Monoallelic
ENSG00000010671	BTK	X	101349447	101390796	-1.53432	4.91258e-47	3.75307e-49	-1.53385	4.75769e-29	1.32721e-31	#N/A	Monoallelic
